# Supplementary material for: Phylum Level Change in the Cecal and Fecal Gut Communities of Rats Fed Diets Containing Different Fermentable Substrates Supports a Role for Nitrogen as a Factor Contributing to Community Structure
Source: Nutrients. 2015 May 6;7(5):3279–99. doi: 10.3390/nu7053279 (PMC4446752; doi:10.3390/nu7053279)
Supplement: Supplementary File 1 [file nutrients-07-03279-s001.xlsx]

## Sheet: Table Legends
	Supplementary Information
	Table S1. Phylotype, DNA sequence, Ribosome database identification, quality and taxonomy; and changes in phylotype abundance (normalized) in the cecum and feces of rats fed purified diets containing different substrates.
	Table S2. SEED assignment as determined using MEGAN in the cecum and feces of rats fed purified diets containing different substrates. Abundance data has been normalized and with the bottom 5% (least abundant) of assignments removed.
	Table S3. Occurrence and abundance of contigous DNA hits against the CAZy data base.

## Sheet: Table 1
							Abundance
Phylotype	DNA Sequence	S_Ab number	Similarity	Phylum	Family		Cecal AC	Fecal ACF	Cecal WB	Fecal WB	Cecal RS	Fecal RS
>AcF04JK	GGATGAACGCTAGCTACAGGCCTAACACATGCAAGTCGAGGGGCATCGGGATTGTGGTTTACCACAGTTGCCGGCGACCGGCGCACGGGTGCGTAACGCGTATCGAACCTGCCCATTACTCCGGGATAGCCTTGCGAAAGCAAGTTTAATACCGGATGTTCTCAATTCGGCACCTGCTGTATTGAGCAAAGATTTATCGGTAATGGATAGCGATGCGTCC	S000678867	0.972	Bacteroidetes	Prevotellaceae	AcF04JK	0.677966	0	0.375171	0	0	0
>AcF083I	GATGAACGCTAGCGACAGGCTTAACACATGCAAGTCGAGGGGCAGCGGGAGGAAAGCTTGCTTTCCTTGCCGGCGACCGGCGCACGGGTGAGTAACACGTATGCAACCTGCCCATGACAGGGGGATAAGCGGGAGAAATTCCGTCTAATACCGCATAACACCCCCGGGAGACATCTCTCGGGAGTCAAAGGAGCGATCCGGTCATGGATGGGCATGCGGC	S001011661	0.967	Bacteroidetes	Porphyromonadaceae	AcF083I	0.745763	0	0	0	0.134409	1.18203
>AcF2NN0	GATGAACGCTGGCGGCGTGCTTAACACATGCAAGTCGAACGAAGCGATAGCGAGGAAGTTTTCGGATGGAATCGATATTGACTGAGTGGCGGACGGGTGAGTAACGCGTGGGTAACCTGCCTCATACAGGGGATAACAGTTAGAAATGGCTGCTAATACCGCATAAGCGCACGGGGTCGCATGATCTTGTGTGAAAAACCGAGGTGGTATGAGATGGACC	S001106574	0.775	Firmicutes	Lachnospiraceae	AcF2NN0	0.610169	0	0.341064	0	0.134409	0
>AcF4CMO	GATGAACGCTGGCGGCGTGCTTAACACATGCAAGTCGAACGAAGATACTGAGAATGAGAGCTTCGGCAGGAATTTTCTTTATCTTAGTGGCGGACGGGTGAGTAACGTGTGGGCAACCTGCCCTGCACTGGGGAATAATCATTGGAAACGATGACTAATACCGCATACGGTTCTTTGGAGGCATCTCCGAGGAAAGAAAGGAATTATTCGGTGCAGGATG	S001379812	1	Firmicutes	Lachnospiraceae	AcF4CMO	0.847458	0.169434	0.784447	0.203046	0.201613	0.540358
>AcF6UCZ	GATGAACGCTGGCGGCGTGCCTAACACATGCAAGTCGAGCGATTTACTTCGGTAAAGAGCGGCGGACGGGTGAGTAACGCGTGGGTAACCTGCCCTGTACACACGGATAACATACCGAAAGGTATGCTAATACGAGATAAAATACTTTTATCGCATGGTAGAAGTATCAAAGCTTTTGCGGTACAGGATGGACCCGCGTCTGATTAGCTAGTTGGTAAGG	S000707521	1	Firmicutes	Peptostreptococcaceae	AcF6UCZ	0.237288	0.677736	1.56889	3.01184	0.436828	0.236407
>AcF8Z6O	GACGAACGCTGGCGGCGTGCCTAACACATGCAAGTCGAACGAAGCTTGAAGATTGATTCTTCGGATGAAATCTGATATGACTGAGTGGCGGACGGGTGAGTAACGCGTGAGCAACCTGCCCTTCGGAGGGGGATAGTGTCTGGAAACGGACAGTAATACCGCATAACGTATTTTTACCGCATGATAGAAATACCAAAACTGAGGTGCCGAAGGATGGGCT	S000637977	1	Firmicutes	unclassified_Clostridiales	AcF8Z6O	1.49153	0.10166	0.341064	0.575296	0.504032	0.168862
>AcF9UMH	GATGAACGCTAGCTACAGGCTTAACACATGCAAGTCGAGGGGCAGCATGAACTTAGCTTGCTAAGTTTGATGGCGACCGGCGCACGGGTGAGTAACACGTATCCAACCTGCCGATGACTCGGGGATAGCCTTTCGAAAGAAAGATTAATACCCGATGGCATAGTTCTTCCGCATGGTAGAACTATTAAAGAATTTCGGTCATCGATGGGGATGCGTTCCA	S000387983	1	Bacteroidetes	Bacteroidaceae	AcF9UMH	0.542373	0.406642	0	0	2.52016	6.21412
>AcFIMYH	GATGAACGCTGGCGGCATGCCTAATACATGCAAGTCGAACGAAGGATTTTTAAAAGCTTGCTTTTGAAAAGACTTAGTGGCGAACGGGTGAGTAACACGTAGGGAACCTGCCCATGTACCCGGGATAACAGATGGAAACGTCTGCTAAAACCGGATAGGTATAGACAAGGCATCTTGACTATATTAAAGCACCTATGGGTGTGGACATGGATGGACCTGC	S002308887	0.854	Firmicutes	Erysipelotrichaceae	AcFIMYH	0.135593	0	0	0	0	0
>AcFJRN7	GACGAACGCTGGCGGCGTGCCTAACACATGCAAGTCGAGCGGAGACAGGAAGTTAGCTTGCTAACATTCTGTTTTAGCGGCGGACGGGTGAGTAACGCGTGAGCAACCTGTCCCAAACAGGGGGATAAGATCTCGAAAGGGATTCTAATACCGCATGAGACCACGGTTCCGCATGGAACAGGGGTCAAAGGAGCAATCCAGTTTGGGGTGGGCTCGCGTC	S000715078	1	unclassified_Bacteria		AcFJRN7	0.135593	0	0	0	0	0
>AcFMSJY	GATAAACGCTGGCGGCGCACATAAGACATGCAAGTCGAACGGAAGTCGTTATAATTGATTCAGATTGAAAGATTTATCCGGATTGAAGAAGATTTTATAACAATGGCTTTAGTGGCGGACTGGTGAGTAACGCGTAAGCAATCTACCTATTAGAGGGGGAATAACAGTGAGAAATCATTGCTAATACTGCATATGCCGTGAACATCGCATGATGAAAACG	S000650398	0.825	Firmicutes	Ruminococcaceae	AcFMSJY	0.576271	0.474415	0	0	0.100806	0
>AcFPDQS	GACGAACGCTGGCGGCGTGCCTAACACATGCAAGTCGAACGGAGTACCCACGAATGAGACTTCGGTTGAATGAATGGACTACTTAGTGGCGGACGGGTGAGTAACGCGTGAGCAACCTGCCTTACAGAGGGGGACAACAGTTGGAAACGACTGCTAATACCGCATAACATAGCGGAGCCGCATGACTCTGCTATCAAAGATTTATCGCTGTAAGATGGGC	S001381829	1	Firmicutes	Ruminococcaceae	AcFPDQS	0.372881	0.10166	0	0.135364	0	0.168862
>AcFV2CE	GATGAACGCTAGCTACAGGCTTAACACATGCAAGTCGAGGGGCAGCATATTTCTAGCAATAGAGATGATGGCGACCGGCGCACGGGTGAGTAACACGTATCCAACCTGCCTTATACTCGGGGATAGCCTTTCGAAAGAAAGATTAATACCCGATGTTATAGTCTAACCGCATGATTTGACTATAAAAGATTTTCGGTATAAGATGGGGATGCGTTCCATT	S002949152	1	Bacteroidetes	Bacteroidaceae	AcFV2CE	0.101695	0	0	0.101523	0	0.236407
>AcFVGQK	GATGAACGCTGGCGGCATGCCTAATACATGCAAGTCGAACGGAGTGAAGCCTTCGGGTTTCATTCAGTGGCGAACGGGTGAGTAATACGCAGGGAACCTGGCCATGGCAGGGGGATACACTCTGGAAACGGAGCATAAGACCCCATAGGCAGTAAGGCGGCATCGCCTTACTGTTAAAGAAAGCTGAAAGGCTTTGGCGATGGATGGACCTGCGGTGCAT	S001379655	1	Firmicutes	Erysipelotrichaceae	AcFVGQK	7.22034	15.3507	5.45703	8.15567	23.3535	3.10706
>AcFXEAK	GATGAACGCTGGCGGCGTGCTTAACACATGCAAGTCGAACGGAGGTCTTAGGAGTGCTTGCACTCAGAAGACTTTAGTGGCGGACGGGTGAGTAACGCGTGGGGAACCTGCCCCGTACCGGGGGATAACAGCCGGAAACGGCTGCTAAAACCGCATAAGCGCACAGTATCGCATGATACAGTGTGAAAAACTCCGGTGGTACGGGATGGACCCGCGTCTG	S001081116	0.967	Firmicutes	Lachnospiraceae	AcFXEAK	0.440678	0	0.341064	0.236887	0	0
>AcFY1DY	ATTGAACGCTGGCGGAACGCTTTACACATGCAAGTCGAACGGTAACGCGGAGAGAAGCTTGCTTCTCTCCGGCGACGAGTGGCGAACGGGTGAGTAATACATCGGAACGTGTCCGCTCGTGGGGGACAACCAGCCGAAAGGTTGGCTAATACCGCATGAGTTCTACGGAAGAAAGAGGGGGACCCGCAAGGGCCTCTCGCGAGCGGAGCGGCCGATGACT	S000517258	1	Proteobacteria	Sutterellaceae	AcFY1DY	0.677966	0	0.545703	1.04907	0	0.57413
>AcG5SKJ	ATTGAACGCTGGCGGCGTGCTTAACACATGCAAGTCGAACGCGAAAGGGGCTTCGGTCCCGAGTAGAGTGGCGCACGGGTGAGTAACGCGTGGACAATCTGCCCTTATGACCGGGATAACAGTTGGAAACGACTGCTAATACCGGATACGCTCCTTATTTGTGGATATGGAGGAAAGGCGGCCTCTGCTTGCAAGCTGTCGTATAAGGATGAGTCCGCGT	S001380230	1	Proteobacteria	Desulfovibrionaceae	AcG5SKJ	0.440678	0	0	0.169205	0.100806	0
>AcG79Y2	GATGAACGCTGGCGGCGTGCCTAATACATGCAAGTCGAACGAAACTTCTTTATCACCGAGTGCTTGCACTCACCGATAAAGAGTTGAGTGGCGAACGGGTGAGTAACACGTGGGCAACCTGCCCAAAAGAGGGGGATAACACTTGGAAACAGGTGCTAATACCGCATAACCATAGTTACCGCATGGTAACTATGTAAAAGGTGGCTATGCTACCGCTTTT	S000100343	1	Firmicutes	Lactobacillaceae	AcG79Y2	0.169492	3.96476	0.545703	0.169205	0.403226	0.101317
>AcG8DTA	GACGAACGCTGGCGGCGTGCCTAACACATGCAAGTCGAACGGAGCTCCGCCCTTCGGGACGGAACTTAGTGGCGAACGGGTGAGTAACGCGTGAAGAACCTGCCTTCCAGTGGGGGACAACAGTTGGAAACGACTGCTAATACCGCATGATACTTTTGAGGGGCATCCCTTAAAAGTCAAAGCTTTAAGTGCTGGAAGATGGCTTCGCGTCTGATTAGCT	S003455581	1	Firmicutes	Ruminococcaceae	AcG8DTA	5.28814	6.87902	0.920873	1.89509	0.974462	2.33029
>AcGA3FZ	GATGAACGCTGGCGGCGTGCTTAACACATGCAAGTCGAACGGAGTGCCTTTGAAAGAGGATTCGTCCAATAGATAAGGTTACTTAGTGGCGGACGGGTGAGTAACGCGTGAGGAACCTGCCTTGGAGTGGGGAATAACACAACGAAAGCTGTGCTAATACCGCATAAAGCAGTTGGGCCGCATGGCTCTGACTGCCAAAGATTTATCGCTCTGAGATGGA	S002311682	0.877	Firmicutes	Ruminococcaceae	AcGA3FZ	0.440678	0	0	0	0	0
>AcGBVMS	GATGAACGCTGGCGGCGTGCTTAACACATGCAAGTCGAGCGAAGCACTGGGGCGGATTCCTCCGGGATGAAGGCCCTTTGACTGAGCGGCGGACGGGTGAGTAACGCGTGGGCAACCTGCCCCATACCGGGGGATAACAGCCAGAAATGGCTGCTAATACCGCATAAGCGCACAGTGCCGCATGGCACGGTGTGAAAAACTCCGGTGGTATGGGATGGGC	S001381262	1	Firmicutes	Lachnospiraceae	AcGBVMS	0.135593	0	0	0	0	0.101317
>AcGD57V	GACGAACGCTGGCGGCGCGCCTAACACATGCAAGTCGAACGGAGCTGTTTTCTCTGAAGTTTTCGGATGGAAGAGAGTTCAGCTTAGTGGCGAACGGGTGAGTAACACGTGAGCAACCTGCCTTTCAGTGGGGACAACATTTGGAAACGAATGCTAATACCGCATAAGACCACAGTGTCGCATGGCACAGGGGTCAAAGGATTTATCCGCTGAAAGATGG	S000518511	0.995	Firmicutes	Ruminococcaceae	AcGD57V	0.101695	0	0	0	0.268817	0.371496
>AcGFCOU	GATGAACGCTGGCGGCGTGCTTAACACATGCAAGTCGAGCGGAGCTTTTCCGCGGAATTTTTCGGAAGGAAGCGGGAAGGACTTAGCGGCGGACGGGTGAGTAACGCGTGGGCAACCTGCCCCATACCGGGGGATAACAGTTAGAAATGACTGCTAATACCGCATAAGCGCACGGAAGCGCATGAATCTGTGTGAAAAACTCCGGTGGTATGGGATGGGC	S000760275	0.757	Firmicutes	Lachnospiraceae	AcGFCOU	0.169492	0	0	0	0.235215	0
>AcGFLOS	GATGAACGCTGGCGGCGTGCCTAACACATGCAAGTCGAACGGGTGCGCGGCGGGGAAGGCTCCGGCCGGAAGCGCGGCGCATGAGTGGCGGACGGGTGAGTAACGCGTGGGCAACCTGCCCTGTACAGGGGGATAACACCTGGAAACAGGTGCTAATACCGCATAACGGGGGAGGCCGCATGGCCTCCTCCTGAAAACTCCGGTGGTACAGGATGGGCCC	S001379936	1	Firmicutes	Lachnospiraceae	AcGFLOS	2.0339	1.21993	0	0	0	0.168862
>AcGGI84	GATGAACGCTGGCGGCGTGCCTAACACATGCAAGTCGAGCGAAGCGACTAAGAAGAAATTTTCGGATGGATTTTTGGTTGACTGAGCGGCGGACGGGTGAGTAACGCGTGGGTAACCTGCCTCATACAGGGGGATAACAGTTAGAAATGACTGCTAATACCGCATAAGCGCACGAGGTCGCATGACCAGGTGCGAAAAGCCAAGACGGTATGAGATGGAC	S001380205	0.967	Firmicutes	Lachnospiraceae	AcGGI84	0.745763	0	0.613915	0.135364	0	0
>AcGL4Z3	GATGAACGCTAGCGACAGGCTTAACACATGCAAGTCGAGGGGCAGCGGGGAAGTAAGCTTGCTTACTTCCGCCGGCGACCGGCGCACGGGTGAGTAACACGTATGCAACCTGGCCGTCACAGAGGGATAACCGGGAGAAATCCCGCCTAATACCGCATAATACCTTCCGGGGACATCCCGGGAGGTCAAAGGAGAGATCCGGTGACGGATGGGCATGCGC	S001081092	0.991	Bacteroidetes	Porphyromonadaceae	AcGL4Z3	0.305085	0.74551	1.02319	1.96277	0	0.168862
>AcGLAA5	GATAAACGCTGGCGGCATGCCTAACACATGCAAGTCGAACGGGGTACCTCTGAAGGAGGCTTCGGCCAACGGAAGGGACTACCTAGTGGCGGACGGGTGAGTAACGCGTGAGGAACCTGCCTCAGAGTGGGGGATAACACACCGAAAGGTGTGCTAATACCGCATAACATATGGGAGGGGCATCCTTTTCATATCAAAGATTTATTGCTCTGAGATGGCC	S001381225	1	Firmicutes	Ruminococcaceae	AcGLAA5	0.711864	0	0.750341	0	0	0
>AcGN7QF	GATGAACGCTGGCGGCGTGTCTAACACATGCAAGTCGAACGGGGTACCCGGAAGCGAGGCTTCGGCCAAGCGGAAGGACTACCTAGTGGCGGACGGGTGAGTAACGCGTGAGCAACCTGCCTTTCAGAGGGGGATAACGGCTGGAAACGGCCGCTAATACCGCATAACATATACTGGTCGCATGGCTGGTATATCAAAGATTTATCGCTGAAAGATGGGC	S001379623	1	Firmicutes	Ruminococcaceae	AcGN7QF	0.237288	0.135547	0.136426	0.101523	0	0.101317
>AcGQMO4	GATGAACGCTAGCGACAGGCTTAACACATGCAAGTCGAGGGGCAGCACGGTGTAGCAATACATTGGTGGCGACCGGCGCACGGGTGAGTAACGCGTATGCAACCTACCTATCAGAGGGGAATAACCCGGCGAAAGTCGGACTAATACCGCATAAAACAGGGGTTCCACATGGAAATATTTGTTAAAGAATTATCGCTGATAGATGGGCATGCGTTCCATT	S000858070	1	Bacteroidetes	Porphyromonadaceae	AcGQMO4	0.169492	0.135547	0	0.203046	0.168011	0.270179
>AcGXAN0	GATGAACGCTAGCGACAGGCTTAACACATGCAAGTCGAGGGGCAGCGGAGGTGAAGGCTTGCCTTCACCTGCCGGCGACCGGCGCACGGGTGAGTAACACGTATGCAACCTGCCTGCCACAGCCGGATAATCGGGAGAAATCCCGTCTAATACGGCATGACACACTGCGGGGACATCCCTGTGGTGTCAAAGGTTAATTCCGGTGGCGGATGGGCATGCG	S001380180	1	Bacteroidetes	Porphyromonadaceae	AcGXAN0	0.508475	0.881057	0.920873	2.94416	0	0.979399
>AcGXEH2	GATAAACGCTGGCGGCGCACATAAGACATGCAAGTCGAACGAACTTAATACCTTGCTTGCAAGGTAAGCGGTTAGTGGCGGACTGGTGAGTAACACGTAAGAAATCTGCCTATCAGAGGGGAATAACAGTGAGAAATCATTGCTAATACCGCATATGCCATAAGAATCGCATGATTCTAGTGGGAAAGGAGCAATCCGCTGATAGATGAGCTTGCGTCTG	S002256944	0.924	Firmicutes	Ruminococcaceae	AcGXEH2	0.20339	0	0.204638	0.101523	0	0
>AcGXGA1	GATGAACGCTGGCGGCGTGCTTAACACATGCAAGCCGAACGAAGCACTTTATTAGATTTCTTCGGAATGAAGATTTTGTGACTGAGTGGCGGACGGGTGAGTAACGCGTGGGTAACCTGCCTCATACAGGGGGATAACAGTTGGAAACGACTGCTAATACCGCATAAGCGCACAGGACCGCATGGTCTGGTGTGAAAAACTCCGGTGGTATGAGATGGAC	S003455571	0.939	Firmicutes	Lachnospiraceae	AcGXGA1	0.101695	0	0	0	2.15054	0.202634
>AcGZVEO	GATGAACGCTAGCGACAGGCTTAACACATGCAAGTCGAGGGGCAGCGGAGCTGGAAGCTTGCTTTCAGCTGCCGGCGACCGGCGCACGGGTGAGTAACACGTATGCAACCTGGCCGTGACAGATGGATAACCGGGAGAAATTCCGCCTAATACAGCATAATACCTGGAAAGGACATCCTTTCCAGGTCAAAGGAAGCGATTCCGGTCACGGATGGGCATG	S001080990	1	Bacteroidetes	Porphyromonadaceae	AcGZVEO	0.237288	0	0.409277	0.541455	0.100806	0.101317
>AcH11GF	GATGAACGCTGGCGGCGTGCTTAACACATGCAAGTCGAACGAGAACCATATGATAGAGGATCCGTCCAATTGAGTATGGGGAAAGTGGCGGACGGGTGAGTAACGCGTGAGCAATCTGCCTTGGAGTGGGAATAAACGGTTGGAAACAGCCGCTAATACCGCATGATGCGTCTGTATCGCATGGTACTGGGCGCCAAAGATTTAGTCGCTCTGAGATGAG	S001380686	0.93	Firmicutes	Ruminococcaceae	AcH11GF	0.20339	0.203321	0	0	0	0
>AcH377R	GACGAACGCTGGCGGCACGCTTAACACATGCAAGTCGAACGGAGAATTCTGGTTTTTAATTAGAATTCTTAGTGGCGGACGGGTGAGTAACACGTGAGCAACCTGCCTTTGAGAGAGGGATAGCTTCTGGAAACGGATGGTAATACCTCATAACATACGTAAATCGCATGGTTTATGTATCAAAGATTTATCACTCAGAGATGGGCTCGCGTCTGATTAG	S003455617	1	Firmicutes	Ruminococcaceae	AcH377R	2.94915	1.62657	0	0.406091	0	0
>AcH39DY	GATGAACGCTGGCGGCGTGCTTAACACATGCAAGTCGAACGGGGATGTACGCTGAAGAAGCTTCGGTGGAATCATGTGCATCTTAGTGGCGGACGGGTGAGTAACGCGTGGGTAACCTGCCTCACACAGGGGGATAACAGCGAGAAATGGCTGCTAATACCGCATAAGCGCACAGTGCTGCATGGCACAGTGTGAAAAAACTCCGGTGGTGTGAGATGGA	S003351732	0.886	Firmicutes	Lachnospiraceae	AcH39DY	0.101695	0.271095	0	0	0	0
>AcH8IH4	GATAAACGCTGGCGGCGCACATAAGACATGCAAGTCGAACGGACCAAATGCTTTGTTTACATTGCAAGAGGTTAGTGGCGGACTGGTGAGTAACACGTAAGCAACCTGCCTGTGAGAGGGGAATAACATTGAGAAATCAATGCTAATACCGCATAAGCTGACAGTATCGCATGATACAGTCAGAAAAGGAGCAATCCACTTACAGATGGGCTTGCGTCTG	S003455644	1	Firmicutes	Ruminococcaceae	AcH8IH4	0.576271	0	0	0.101523	0.134409	0
>AcHAL3Y	GATGAACGCTGGCGGCGTGCCTAACACATGCAAGTCGAGCGGGAAATTTTAAAATGAAGCTTCGGTAGATTTTTAAGATGGAGAGCGGCGGACGGGTGAGTAACGCGTAGGCAACCTGCCCTTTGCAGAGGGATAGCCATTGGAAACGATGATTAAAACCTCATAATACTAAATAGTCACATGGCTGTTTGGTCAAAGATTTATCGGCAAAGGATGGGCC	S000762226	1	Firmicutes	unclassified_Clostridiales	AcHAL3Y	0.20339	0	0	0	0	0
>AcHB1MZ	GATAAACGCTGGCGGCGCACATAAGACATGCAAGTCGAACGAACTTAATTCATTCTTTTAGATTGGAAGCGGTTAGTGGCGGACTGGTGAGTAACGCGTGAGCAACCTGCCTATTAGAGGGGAATAACAGTGAGAAATCATTGCTAATACCGCATATGCTTACACTATTGCATGATAGAGTAAGGAAAGGAGCAATCCGCTAATAGATGGGCTCGCGTCT	S002308877	1	Firmicutes	Ruminococcaceae	AcHB1MZ	0.508475	0.372755	0	0	0	0
>AcHBM0E	AGTGAACGCTGGCGGCGTGCCTAATACATGCAAGTCGAACGATGAAGCTCTAGCTTGCTAGAGTGGATTAGTGGCGCACGGGTGAGTAATGCATAGATAACATGCCCTTTAGTCTAGGATAGCCATTGGAAACGATGATTAATACTGGATACTCCTTACGAGGGAAAGTTTTTCGCTAAAGGATTGGTCTATGTCCTATCAGCTTGTTGGTGAGGTAATG	S000360594	1	Proteobacteria	Helicobacteraceae	AcHBM0E	0.847458	0.779397	1.39836	0.473773	0	0
>AcHCZJ2	GATGAACGCTGGCGGCGTGCTTAACACATGCAAGTCGAGCGAAGCGCTTAAGTTTGATTCTTCGGATGAAGACTTTTGTGACTGAGCGGCGGACGGGTGAGTAACGCGTGGGTAACCTGCCTCATACAGGGGATAACAGTTAGAAATGACTGCTAATACCGCATAAGACCACAGGGTCGCATGACCCGGTGGTAAAAACTCCGGTGGTATGAGATGGACC	S000789393	0.99	Firmicutes	Lachnospiraceae	AcHCZJ2	0.813559	0.677736	0.204638	0	3.29301	0.878082
>AcHFBGC	GATGAACGCTGGCGGCGTGCTTAACACATGCAAGTCGAACGGAACACCCTTGAAGGAGTTTTCGGACAACTGATAGGAATGTTTAGTGGCGGACGGGTGAGTAACGCGTGAGTAACCTGCCTTGGAGTGGGGAATAACAGCTGGAAACAGCTGCTAATACCGCATGATGCAGTTGGGTCGCATGGCTCTGACTGCCAAAGATTTATCGCTCTGAGATGGA	S001380536	1	Firmicutes	Ruminococcaceae	AcHFBGC	5.28814	0	5.42292	1.65821	0.705645	0.878082
>AcI2R2E	GATGAACGCTGGCGGCGTGCCTAACACATGCAAGTCGAACGGGTGCATTCTGCGGAAGGTTTCGGCCGGAAGGAGGATGCATGAGTGGCGGACGGGTGAGTAACGCGTGGGTAACCTGCCCTGTACAGGGGGATAACACTTGGAAACAGGTGCTAATACCGCATAAGCGCGAGGGACCGCATGGTTCCATGTGGAAAGCGAACACGGTACAGGATGGGCC	S001380037	1	Firmicutes	Lachnospiraceae	AcI2R2E	0.101695	0	0	0	0	0
>AcI31W6	GATGAACGCTAGCGACAGGCTTAACACATGCAAGTCGAGGGGCAGCGGGGGTGTAGCAATACATCTGCCGGCGACCGGCGCACGGGTGAGTAACACGTATGGAACCTGCCCCCTGCCGGGGGATAAGCGGAAGAAATTCCGTCTAATACCGCATAATACCGTAGCCGGGCCTCCGGCATCGGTCAAAGGAGCGATCCGGCAGGGGATGGACATGCGGCGC	S001380564	1	Bacteroidetes	Porphyromonadaceae	AcI31W6	0.101695	0	0.170532	0	0	0
>AcI35B9	GACGAACGCTGGCGGCGTGCCTAACACATGCAAGTCGAACGGAGTACCCATGACAGAGACTTCGGTCAATGGATTGGACTACTTAGTGGCGGACGGGTGAGTAACGCGTGAGCAACCTGCCTTACAGAGGGGACAACAGTTGGAAACGACTGCTAATACCGCATAATATAATGAGGTCGCATGGCTTTATTATCAAAGATTTATCGCTGTAAGATGGGCT	S001380437	0.991	Firmicutes	Ruminococcaceae	AcI35B9	0.305085	0	0	0	0.168011	0
>AcI4N3Q	GATGAACGCTGGCGGCGTGCTTAACACATGCAAGTCGAACGGAGGTAAACGCTGAAGAGATTTCGGTCAATTCTTGTTTATCTTAGTGGCGGACGGGTGAGTAACGCGTGGGTAACCTGCCCTGTACAGGGGGATAACACTTAGAAATAGGTGCTAAGACCGCATAAGCGCACAGTACCGCATGGTACAGTGTGAAAAGCTCCGGTGGTACAGGATGGAC	S001380752	1	Firmicutes	Lachnospiraceae	AcI4N3Q	13.2203	2.60928	1.603	0.609137	0	0
>AcI8T1X	GATGAACGCTGGCGGCGTGCCTAACACATGCAAGTCGAGCGAGAAGCTCTCGACGGATACTTCGGTTGAAGGAGAGAGTGGAAAGCGGCGGACGGGTGAGTAACGCGTAGGCAACCTGCCTTATGCACAGGGATAGCCATTGGAAACGATGATTAAAACCTGATAACACTGCATTTTCACATGGGAAAGCAGTCAAAGATTTATCGGCATAAGATGGGCC	S001379767	1	Firmicutes	unclassified_Clostridiales	AcI8T1X	0.372881	0.304981	0.443383	0.304569	0.100806	0
>AcI9MXH	GATGAACGCTGGCGGCGCGCCTAACACATGCAAGTCGAACGAGAAGCACCTCTTCGGAGGTGTGGATAGTGGCGAACGGCTGAGTAACACGTGGGCAACCTGCCCCTCTCATCGGGATAGCCTCGGGAAACCGGGATAATACCGGATACTCCAACGCTTTCGCATGGAAGCGTTGGGAAAGCTCTGGCGGAGAGGGATGGGCCCGCGGCCTGTTAGCTAG	S001379929	0.991	Actinobacteria	Coriobacteriales	AcI9MXH	0.271186	2.3043	0.204638	0.642978	0.806452	0.236407
>AcIC2QP	GACGAACGCTGGCGGCGCGCCTAACACATGCAAGTCGAACGGAGTTATACCGACTGAAGTTTTCGGATGGACGTTGATATAACTTAGTGGCGAACGGGTGAGTAACACGTGAGCAACCTGCCCTAAAGTGGGGGACAACAGTTGGAAACGACTGCTAATACCGCATAAGCCCACAGTGTCGCATGGCACAGCGGGAAAAGGATTTATTCGCTTTAGGATG	S001081034	0.925	Firmicutes	Ruminococcaceae	AcIC2QP	0.169492	0	0	0.236887	0	0
>AcIDQWJ	GACGAACGCTGGCGGCGTGCCTAACACATGCAAGTCGAGCGGAGACATGGAGTAGCTTGCTACGAGATGTTTTAGCGGCGGACGGGTGAGTAACGCGTGAGCAACCTGTCCTCTACAGGGGGATAAGATACCGAAAGGTGTTCTAATACCGCATGAGACCACAGAGTCACATGGCTTAGGGGTCAAAGGAGGAATCCGGTAGAGGGTGGGCTCGCGTCCG	S003679227	0.789	Firmicutes	unclassified_Clostridiales	AcIDQWJ	1.01695	2.64317	0	0	0	0
>AcIFDEM	GATGAACGCTGGCGGCGTGCTTAACACATGCAAGTCGAACGGGGTACCCCCAAAGGAGTTTTCGGACAACTGCGGGGAATACCTAGTGGCGGACGGGTGAGTAACGCGTGAGTAACCTGCCTTGGAGTGGGGAATAACAGTTGGAAACAATTGCTAATACCGCATGATGCAGTTGGGTCGCATGGCTCTGACTGCCAAAGATTTATCGCTCTGAGATGGA	S001379786	1	Firmicutes	Ruminococcaceae	AcIFDEM	3.15254	1.15215	2.6603	1.38748	0.638441	1.65485
>AcILHQZ	GACGAACGCTGGCGGCATGCCTAACACATGCAAGTCGAACGGGGTATGATAGCAGAAGACTACGGTTGGAAGCTAGAAATACCAAGTGGCGGACGGGTGAGTAACGCGTGGGTAACGTACCTTCCAGAGGGGAATAACCGTGAGAAATCACAGCTAATACCGCATGAGGTTCAACCATCGCATGATGGAAGAAAGAAAGGTGGCAGAGCAGAGCAGCTGC	S001381988	0.793	Firmicutes	Peptococcaceae 1	AcILHQZ	0.101695	0	0	0	0	0
>AcIMOL8	GATGAACGCTGGCGGCGTGCCTAACACATGCAAGTCGAGCGAAGCACTTTGATTGGATTCTTCGGATGAAGATGATTGTGACTGAGCGGCGGACGGGTGAGTAACGCGTGGGCAACCTGCCTTACACAGGGGGATAACAGTTAGAAATGACTGCTAATACCGCATAAGACCCCAGAACCGCATGGTTCTGAGGTAAAAACTCCGGTGGTGTAAGATGGGC	S001012660	1	Firmicutes	Lachnospiraceae	AcIMOL8	0.474576	0.406642	1.15962	0.338409	0.100806	0
>AcINOM8	GATGAACGCTGGCGGCGTGCTTAACACATGCAAGTCGAACGGGGTTAACATTTTTGAAGCAAATAGCTTGCTAGGAGTGGAGATGTTGTTAACTTAGTGGCGGACGGGTGAGTAACGCGTGGGTAACCTGCCGTATACAGGGGATAACACTTAGAAATAGGTGCTAATACCGCATAAGCGCACAGCTTTGCATGAAGCAGTGTGAAAAACTCTGGTGGTA	S001081020	0.991	Firmicutes	Lachnospiraceae	AcINOM8	0.474576	1.62657	0	0.913706	0.100806	0
>AcIOOD2	GGATGAACGCTGGCGGCGTGCCTAACACATGCAAGTCGAGCGAAGCAATTTTTCAGAAGTTTACGGATGGAAGAGAGATTGACTGAGCGGCGGACGGGTGAGTAACGCGTGGGTAACCTGCCTCATACAGGGGATAACAGTTAGAAATGACTGCTAAAACCGCATAAGCGCACAAGGACCGCATGGTCCGGTGTGAAAAACTCCGGTGGTATGAGATGGA	S003455598	0.991	Firmicutes	Lachnospiraceae	AcIOOD2	0.40678	0.135547	0.136426	0	0.235215	0.168862
>AcIP03A	GATGAACGCTGGCGGCGTGCTTAACACATGCAAGTCGAACGAAGCGCTTAAGTAGATTTCTTCGGAATGAAGCTTTTGTGACTGAGTGGCGGACGGGTGAGTAACGCGTGGGTAACCTGCCTCATACAGGGGGATAACAGTTAGAAATGACTGCTAATACCGCATAAACGCACAGGGCCGCATGGTCTAGTGTGAAAAACTCCGGTGGTATGAGATGGAC	S001057607	0.892	Firmicutes	Lachnospiraceae	AcIP03A	0.20339	0	0	0	0	0
>AcISGWO	GACGAACGCTGGCGGCATGCCTAACACATGCAAGTCGAACGGAGTTGTTATACAGAAGTTCTTCGGGATGGAAGTATAAGAACTTAGTGGCGGACGGGTGAGTAACGCGTGGGTAACCTGCCCTTTTGTGGGGAACAACTTCGAGAAATCGGAGCTAATACCGCATAATAATAGAGAATCGCATGATTCTTTAAGGAAAGATGGCCTCTGAAGATGCTAT	S001380388	1	Firmicutes	Peptococcaceae 1	AcISGWO	0.508475	0.372755	0.136426	0.101523	0	0
>AcIY061	GATGAACGCTGGCGGCGTGCTTAACACATGCAAGTCGAACGAAGCACCTCTCCCGATGAATGGACCAGCTTGCTGGGAAAGGAATCAACTGAGGTGACTGAGTGGCGGACGGGTGAGTAACGCGTGGGTAACCTGCCCCATAGAGGGGGACAACAGTTGGAAACGACTGCTAATACCGCATAGGAAGGGACTGCCGCATGACAGTTTCTTGAAAGAGTAA	S000715115	0.911	Firmicutes	Lachnospiraceae	AcIY061	0.983051	0.203321	0.272851	0.676819	0	0
>AcIYCTA	GACGAACGCTGGCGGCGTGCTTAACACATGCAAGTCGAACGGAGTGCCTCGGAAAGAGATTTCGGTCAATGGAAGGGGTTACTTAGTGGCGGACGGGTGAGTAACGCGTGAGGAACCTGCCTTTCAGAGGGGGACAACAGCTGGAAACGGCTGCTAATACCGCATAACATATGGGTATCGCATGGTATCTGTATCAAAGATTTTATCGCTGAGAGATGGC	S001381901	0.883	Firmicutes	Ruminococcaceae	AcIYCTA	0.610169	0.372755	0	0	0	0
>AcJBCS3	GATGAACGCTAGCTACAGGCTTAACACATGCAGGTCGAGGGGCAGCATTTCAGTTTGCTTGCAAACTGGAGATGGCGACCGGCGCACGGGTGAGTAACACGTATCCAACCTGCCGATAACTCGGGGATAGCCTTTCGAAAGAAAGATTAATACCCGATGGTATAATTAGACCGCATGGTCTTGTTATTAAAGAATTTCGGTTATCGATGGGGATGCGTTC	S000522867	0.972	Bacteroidetes	Bacteroidaceae	AcJBCS3	0.169492	0.135547	0	0	0	0
>AcJDFOU	GATGAACGCTGGCGGCGTGCTTAACACATGCAAGTCGAGCGAAGCACTCTGTTGGATTTCTTCGGAAGGAAGACAGTTTGACTGAGCGGCGGACGGGTGAGTAACGCGTGGGTAACCTGCCTTACACAGGGGATAACAGTTAGAAATGACTGCTAATACCGCATAACCCGCTAGGGCCACATGGCCCGGACGGAAAAGGTTATATCGGTGTAAGATGGAC	S000763135	0.835	Firmicutes	Lachnospiraceae	AcJDFOU	0.135593	0.169434	0	0	0	0
>AcJDZLU	ATTGAACGCTGGCGGCAGGCTTAACACATGCAAGTCGAACGGTAACAGGAGAAAGCTTGCTTTCTTGCCTGACGAGTGGCGGACGGGTGAGTATGCTTGGGAATCTGGCTTACGGAGGGGGATAACTGCGGGAAACTGCAGCTAATACCGCGTAATATCTTTAGGATTAAAGGGGGCGAAAGCTCTTGCCGTGAGATGAGCCCAAGTGGGATTAGGTAGT	S001873118	0.853	Proteobacteria	Pasteurellaceae	AcJDZLU	0.135593	0	0	0	0	0
>AcJFFN5	GACGAACGCTGGCGGCGTGCTTAACACATGCAAGTCGAACGGAGCACCCCTGAAAGAGTTTTCGGACAATGGATGGGAATGCTTAGTGGCGGACTGGTGAGTAACGCGTGAGGAACCTGCCTTCCAGAGGGGGACAACAGTTGGAAACGACTGCTAATACCGCATAATACATTTGAATCGCATGGTTTGAATGTCAAAGATTTATCGCTGGAAGATGGCC	S001379635	1	Firmicutes	Ruminococcaceae	AcJFFN5	2.98305	1.89766	4.43383	2.77496	0.134409	0.675447
>AcJHDCI	GATGAACGCTAGCGGCAGGCTTAACACATGCAAGTCGAAGGGCATCGGGGAGAGTGCTTGCACTCTCTGCCGGCGACTGGCGCACGGGTGAGTAACACGTATGCAACCTGCCCTCCACAGGGGACAACCTTCCGAAAGGGAGGCTAATCCCGCGTATATGGTACCGGGGCATCCCGGGGTCAGGAAAGGGTAACACCGGTGGAGGATGGGCATGCGGCGC	S001379756	0.99	Bacteroidetes	Porphyromonadaceae	AcJHDCI	17.2542	0	9.78854	14.5854	0	0
>AcJKM0W	GATGAACGCTAGCTACAGGCTTAACACATGCAAGTCGAGGGGCAGCATGGTCTTAGCTTGCTAAGACTGATGGCGACCGGCGCACGGGTGAGTAACACGTATCCAACCTGCCTTATACTCCCGGACAGCCTTCTGAAAGGAAGATTAATACGGGATGGTATCACGGGCCAGCATTTTCTCGTGATTAAAGAACTTCGGTATAAGATGGGGATGCGTTCCA	S001380119	1	Bacteroidetes	Bacteroidaceae	AcJKM0W	4.77966	4.43917	2.69441	1.11675	0.201613	1.89125
>AcJRQ67	GATGAACGCTAGCGACAGGCTTAACACATGCAAGTCGAGGGGCAGCGGGAGGAAAAGCTTGCTTTTCCTTGCCGGCGACCGGCGCACGGGTGAGTAACACGTATGCAACCTGCCCCGGGCCGGGGGATAAGCGGTGGAAACGCCGTCTAATACCGCGTATATCCCATGGGGGCATCCCTATGGGAGGAAAGGAGAGATCCGGCCTGGGATGGGCATGCGG	S001081007	1	Bacteroidetes	Porphyromonadaceae	AcJRQ67	0.847458	1.0166	1.22783	1.489	0	0
>AcJSCB8	GACGAACGCTGGCGGCGTGCTTAACACATGCAAGTCGAACGGAGTGCTCCGGAAAGAGATTTCGGTCAATGGATGGAGTTACTTAGTGGCGGACGGGTGAGTAACGCGTGAGGAACCTGCCTTTCAGAGGGGGATAACAGTTGGAAACGACTGCTAATACCGCATAACACGCGGGTGTCGCATGGCATCTGCGTCAAAGATTTATCGCTGAGAGATGGCC	S001380407	0.915	Firmicutes	Ruminococcaceae	AcJSCB8	0.644068	0.406642	3.27422	0.947547	0	0
>AcJTU78	GACGAACGCTGGCGGCGTGCCTAACACATGCAAGTCGAACGGAACTCTTTCGAAAGATTCCTTCGGGATGAATTTGGCTGAGTTTAGTGGCGGACGGGTGAGTAACGCGTGAGTAACCTGCCTTTGAGAGGGGAATAACAATCTGAAAAGATTGCTAATACCGCATAACATATGTTTGTCGCATGGCAGACATATCAAAGATTTTATCGCTCAAAGATGG	S001379824	1	Firmicutes	Ruminococcaceae	AcJTU78	0.711864	1.18604	0.102319	0.135364	2.82258	8.37555
>AcJU6TJ	GATGAACGCTGGCGGCGTGCTTAACACATGCAAGTCGAACGGGGATGTGATGTGCGAGGGAAATAGCTTGCTATAGACTAAACTTTTCACATCCTAGTGGCGGACGGGTGAGTAACACGTGGGTAACCTGCCGTATACAGGGGGATAACACCTGGAAACAGGTGCTAATACCGCATAAGCGCACAGCTTTGCATGAAGCAGTGTGAAAAACCGAGGTGGT	S002478237	0.972	Firmicutes	Lachnospiraceae	AcJU6TJ	0.101695	0	0	0	0	0
>AcJWDVN	GATGAACGCTGGCGGCGTGCTTAACACATGCAAGTCGAACGAGAACTACTGGATTGAGGATTCGTCCAAATGAAGGTAGGGAAAGTGGCGGACGGGTGAGTAACGCGTGAGGAACCTGCCTCGGAGTGGGGAATAACGGTTGGAAACAGCCGCTAATACCGCATGATGCAGCTGAGTCGCATGGCTCTGGCTGCCAAAGATTTATCGCTCTGAGATGGCC	S001380452	1	Firmicutes	Ruminococcaceae	AcJWDVN	0.372881	0	0.170532	1.18443	0	0
>AfF7IC2	GACGAACGCTGGCGGCGTGCCTAACACATGCAAGTCGAACGGAACTATGTTAAAGGATTTCTTCGGAATGAAAGTGATATAGTTTAGTGGCGGACGGGTGAGTAACGCGTGAGTAACCTGCCTCTAAGAGGGGGATAACAATCTGAAAAGATTGCTAATACCGCATAACATATCGAAATCGCATGGTTTTGATATCAAAGATTTTATCGCTTAGAGATGG	S001379680	0.947	Firmicutes	Ruminococcaceae	AfF7IC2	0	0.338868	0	0.135364	0	0
>AfF8DUQ	GATGAACGCTGGCGGCGTGCCTAACACATGCAAGTCGAACGAAGCACTTCTGATCGGAGATTCGTCAAAGATTGGATTTGACTTAGTGGCGGACGGGTGAGTAACGCGTGAGCAACCTGCCTTTCAGAGGGGGACAACAGTTGGAAACGACTGCTAATACCGCATGATGTATTTAGGAGGCATCTTCTGAATACCAAAGGAGCAATCCGCTGAAAGATGG	S001380765	0.906	Firmicutes	Ruminococcaceae	AfF8DUQ	0	0.711623	0.306958	0.304569	0	0.135089
>AfFLAKF	GATGAACGCTAGCGGCAGGCTTAACACATGCAAGTCGAAGGGCAGCGGGAGTGGTGCTTGCACCACTTGCCGGCGACTGGCGCACGGGTGAGTAACACGTATGCAACCTGCCCTCCACAGGGGACAACCTTCCGAAAGGGAGGCTAATCCCGCGTATATCTCTCGGAGGCATCTTCGGGAGAGGAAAGGATAACCGGTGGAGGATGGGCATGCGGCGCAT	S000715082	0.991	Bacteroidetes	Porphyromonadaceae	AfFLAKF	0	0.711623	0	0	0	0
>AfFO8TA	GATGAACGCTAGCGACAGGCTTAACACATGCAAGTCGAGGGGCAGCGTGGATGTAGCAATACATCTGACGGCGACCGGCGCACGGGTGAGTAACACGTATGGAACCTGCCCCCGGCCGGGGGATAAGCGGAAGAAATTCCGTCTAATACCGCATAACGCAGTACTGAGGCATCTCAGTGCTGCCAAAGGAGCGATCCGGCCGGGGATGGACATGCGGCGC	S001381439	1	Bacteroidetes	Porphyromonadaceae	AfFO8TA	0	0.474415	0.579809	0.676819	0	0
>AfFYMHX	ATGAACGCTAGCGACAGGCTTAACACATGCAAGTCGAGGGGCAGCGGGGGAGCGGCAACGCTCCTGCCGGCGACCGGCGCACGGGTGAGTAACACGTATGCAACCTGCCCGTGACTGGGGGATAAGCGGGAGAAATCCCGTCTAATACCGCATAACGCGGGAGGGGACATCCTCCTTCCGCCAAAGATTCATCGGTCACGGATGGGCATGCGTCGCATTA	S001081026	0.925	Bacteroidetes	Porphyromonadaceae	AfFYMHX	0	0.304981	0	0.879865	0	0.168862
>AfGAVSU	GATGAACGCTAGCGACAGGCTTAACACATGCAAGTCGAGGGGCATCACGGGAGGTAGCAATACCTTCTGGTGGCGACCGGCGCACGGGTGAGTAACACGTATGCAACCTGCCCTGTACAGAGGGACAAGCGGTGGAAACGCCGTCTAATCCCGCATGCACTCTTCCGGGGGCATCCCCGGGAGAGTAAAGGAGAGATCCGGTACAGGATGGACATGCGGC	S001380841	1	Bacteroidetes	Porphyromonadaceae	AfGAVSU	0	0.10166	0.341064	2.47039	0	0
>AfGPX5J	GACGAACGCTGGCGGCGTGCCTAACACATGCAAGTCGAGCGAGTGGAGTTCTTCGGAACAAAGCTAGCGGCGGACGGGTGAGTAACACGTGGGCAACCTGCCTCATAGAGGGGAATAGCCTTCCGAAAGGGAGATTAATACCGCATAAGATTGTAGCTTCGCATGAAGTAGCAATTAAAGGAGCAATCCGCTATGAGATGGGCCCGCGGCGCATTAGCTA	S000582520	1	Firmicutes	Clostridiaceae 1	AfGPX5J	0	1.25381	1.15962	3.5533	0.302419	0
>AfGZS9Q	GATAAACGCTGGCGGCGCACATAAGACATGCAAGTCGAACGGACTTAACTCATTCTTTTAGATTGAGAGCGGTTAGTGGCGGACTGGTGAGTAACACGTAAGCAACCTGCCTATTAGAGGGGAATAACAGTGAGAAATCATTGCTAATACCGCATATGCTAACAGCATCGCATGGTGCAGTTAGGAAAGGAGCAATCCGCTAATAGATGGGCTTGCGTCT	S002478441	0.892	Firmicutes	Ruminococcaceae	AfGZS9Q	0	0.10166	0	0	0	0
>AfH304D	GATGAACGCTGGCGGCGTGCCTAACACATGCAAGTCGAGCGGGAAACCTTTGAATGATCCTTCGGGAGAATGAGAAGGCGGAGAGCGGCGGACGGGTGAGTAACGCGTAGGCAACCTGCCCTTTGCAGAGGGATAGCCACTGGAAACGGTGATTAAAACCTCATAACGCCGAATGTTCACATGGACAATCGGTCAAAGATTTATCGGCAAAGGATGGGCC	S002478273	1	Firmicutes	Clostridiales_Incertae Sedis XIII	AfH304D	0	0.169434	0	0	0	0
>AfH38VO	GATGAACGCTGGCGGCATGCCTAATACATGCAAGTCGAACGAGAGACCTTCGGGTCTCTAGTGGCGAACGGGTGAGTAACACGTAGGGAACCTGCCCGCGCACCGGGAATACGCTCTGGAAACGGAGAACAAATCCCGATGTACAGGAAGGAGGCATCTTCTTTCTGTGAAACATCCTTTAGGGGATGGGGCGCGGATGGACCTGCGGTGCATTAGTTTG	S000583178	1	Firmicutes	Erysipelotrichaceae	AfH38VO	0	6.54016	0.238745	0.913706	0	0
>AfHFLCS	GATGAACGCTAGCTACAGGCTTAACACATGCAAGTCGAGGGGCAGCATGATCTTAGCTTGCTAAGATTGATGGCGACCGGCGCACGGGTGAGTAACGCGTATCCAACCTGGCCTTTACTCCGGGATAGCCTTTCGAAAGAAAGATTAATACGGGATGGTTTTGTGGTTCCGCATGGGATTATAAATAAAGATTTATCGGTAAAGGATGGGGATGCGTTCC	S001081082	1	Bacteroidetes	Prevotellaceae	AfHFLCS	1.25424	0.440529	2.72851	3.51946	0	0
>AfI0JBK	GATGAACGCTGGCGGCGTGCTTAACACATGCAAGTCGAGCGAAGCACTTTCTCGGAAGTTTTCGGATGGAAGAGGATTTGACTGAGCGGCGGACGGGTGAGTAACGCGTGGGGAACCTGCCTCATACAGGGGAATAACAGTTAGAAATGACTGCTAATGCCGCATAAGCGCACACTGTGGCATCACAGAGTGTGAAAAACTCCGGTGGTATGAGATGGCC	S000100498	0.93	Firmicutes	Lachnospiraceae	AfI0JBK	0	0.10166	0	0	0	0
>AfICQ7E	GACGAACGCTGGCGGCGCGCCTAACACATGCAAGTCGAACGGAGTTATGTTGACAGAAGCCTTCGGGTGGAAGATGAGATAACTTAGTGGCGGACGGGTGAGTAACACGTGAGCAACCTGCCTATCAGAGGGGATAACGTTCTGAAAGAACGCTAATACCGCATAACGTGCGAGGGAGACATCTCTCTTGTACCAAAGGAGCAATCCGCTGATAGATGGG	S003455595	0.976	Firmicutes	Ruminococcaceae	AfICQ7E	0	0.10166	0	0.169205	0	0
>AfIESNF	GACGAACGCTGGCGGCGTGCCTAATACATGCAAGTCGAGCGAGCTGAACCAACAGATTCACTTCGGTGATGACGTTGGGAACGCGAGCGGCGGATGGGTGAGTAACACGTGGGGAACCTGCCCCATAGTCTGGGATACCACTTGGAAACAGGTGCTAATACCGGATAAGAAAGCAGATCGCATGATCAGCTTATAAAAGGCGGCGTAAGCTGTCGCTATG	S000444202	1	Firmicutes	Lactobacillaceae	AfIESNF	0	7.48899	3.24011	3.58714	0.772849	0
>AfIF4OQ	GATGAACGCTGGCGGCGTGCGTAACACATTCAAGTCGAACGATTATGGTTCCTTCGGGAGCTATGATAGTGGCGGACGGGTGAGTAACGCGTGAGCAACCTGCCTATCAAAGTGGGATAACACAGGGAAACTTGTGCTAATACCGCATGATGCATATTAGTCGCATGTCTGATATGCCAAAGGGAACCGATGATAGATGGGCTCGCGTATGATTAGATAG	S001381658	0.953	Firmicutes	Ruminococcaceae	AfIF4OQ	0	0.10166	0	0	0	0
>AfIJQ48	GATGAACGCTGGCGGCGTGCTTAACACATGCAAGTCGAACGGAGCACCCCTGAAGGAGTTTTCGGACAACTGAAGGGAATGCTTAGTGGCGGACGGGTGAGTAACGCGTGAGTAACCTGCCTTGGAGTGGGGAATAACAGCTGGAAACAGCTGCTAATACCGCATAATATGTCTGTGTCGCATGGCACTGGACATCAAAGATTTATCGCTCTGAGATGGA	S000761443	0.947	Firmicutes	Ruminococcaceae	AfIJQ48	0	1.11826	0	0	0	0
>AfIRLEK	GATGAACGCTAGCGGCAGGCTTAACACATGCAAGTCGAAGGGTAACAGGGGGAGTGCTTGCACTTCCTGCTGACGACTGGCGCACGGGTGAGTAACACGTATGCAACCTGCCCCGTACAGGGGGACAACCTCGCGAAAGCGAGGCTAATCCCGCGTATATGTTCCCGGGGCATCCCGGGACCAGGAAAGGTTGACACCGGTACGGGATGGGCATGCGGCG	S001081046	1	Bacteroidetes	Porphyromonadaceae	AfIRLEK	0	6.84514	0	0	27.6882	45.3563
>AfJCE9Y	GACGAACGCTGGCGGCGTGCCTAATACATGCAAGTCGAGCGAGCTTGCCTAGATGATTTTAGTGCTTGCACTAAATGAAACTAGATACAAGCGAGCGGCGGACGGGTGAGTAACACGTGGGTAACCTGCCCAAGAGACTGGGATAACACCTGGAAACAGATGCTAATACCGGATAACAACACTAGACGCATGTCTAGAGTTTGAAAGATGGTTCTGCTAT	S000343691	1	Firmicutes	Lactobacillaceae	AfJCE9Y	0.237288	1.45713	0.716235	6.32826	1.27688	0.202634
>AfJDCJ5	GATAAACGCTGGCGGCGTGCCTAACACATGCAAGTCGAACGGGCGAAGCCTTTAAGTTTACTTTTAGGCCTAGCTAGTGGCGGACGGGTGAGTAATGCGTGAGCAACCTGCCTTTCAGAGGGGGACAACAGTTGGAAACGACTGCTAATACCGCATGATGTATTTTGAGGGCATCCTTGAGATACCAAAGATTTTATCGCTGAAAGATGGGCTCACGTCT	S000791143	0.897	Firmicutes	Ruminococcaceae	AfJDCJ5	0	0.135547	0.102319	0	0	0
>AfJHQBW	GATGAACGCTAGCTACAGGCTTAACACATGCAAGTCGAGGGGCAGCATGGTCTAGCAATAGGCTGATGGCGACCGGCGCACGGGTGAGTAACACGTATCCAACCTGCCGATTATTCCGGGATAGCCTTTCGAAAGAAAGATTAATACTGGATAGTATAACGAGAAGGCATCTTCTTGTTATTAAAGAATTTCGATAATTGATGGGGATGCGTTCCATTAG	S001380508	1	Bacteroidetes	Bacteroidaceae	AfJHQBW	0.135593	0.135547	0	0	0	0
>AfJHXKV	GATGAACGCTGGCGGCGTGCTTAACACATGCAAGTCGAACGGGATCCCTGGCGGCCTGGCTGTCGGGGTGAGAGTGGCGAACGGGTGAGTAATGCGTGACCAACCTGCCCTGTGCACCGGAATAGCTCCTGGAAACGGGTGGTAATACCGGATGCTCCGCCCCACCGCATGGTGGGGTGGGAAATGCTTTTTGCGGCATGGGATGGGGTCGCGTCCTATC	S001379979	1	Actinobacteria	Bifidobacteriales	AfJHXKV	0	0.914944	1.29604	2.16582	2.31855	0.57413
>AfJI38G	GATGAACGCTGGCGGCGTGCTTAACACATGCAAGTCGAACGAAGCAGGAAGAGAAGCGCAAGCAGAAGTTCCTGACTGAGTGGCGGACGGGTGAGTAACGCGTGGATAACCTGCCTTTCACAGGGGATAACAGTTGGAAACGGCTGCTAATACCGCATAAGCCTCTTTGTCGCATGAGAGAAGAGGGAAAGAGAAATCGGTGAGAGATGGATCCGCGTCC	S001381659	0.976	Firmicutes	Lachnospiraceae	AfJI38G	0	0.135547	0.306958	0	0	0
>AfJJ72N	GATGAACGCTGGCGGCGTGCTTAACACATGCAAGTCGAACGGGAATTTTATTATTGAAGCTTCGGCAGATTTAATTTAATTCTAGTGGCGGACGGGTGAGTAACGCGTGGGTAACCTGCCTCATACAGGGGGATAACAGTCAGAAATGACTGCTAATACCGCATAAGCGCACAGGAGCGCATGCTCCGGTGTGAAAAACTCCGGTGGTATGGGATGGACC	S001379679	1	Firmicutes	Lachnospiraceae	AfJJ72N	0	1.21993	0	0	0	0
>RcGVJY9	GACGAACGCTGGCGGCGTGCCTAACACATGCAAGTCGAACGGAGTTTGCGAGAGCTTGCTTTTGCAAACTTAGTGGCGGACGGGTGAGTAACGCGTGAGCAACCTGCCTTTCAGAGGGGGATAACGTTTTGAAAGAACGCTAATACCGCATAACATATCGGTGCCGCATGACACTGATATCAAAGGAGCAATCCGCTGAGAGATGGGCTCGCGTCCGATT	S002478449	0.986	Firmicutes	Ruminococcaceae	RcGVJY9	0	0	0	0	0.168011	0
>RcHAPCR	GACGAACGCTGGCGGCGTGCCTAACACATGCAAGTCGAACGGAACTATTTTAAAAGATTTCTTCGGAATGATTTTGGCTTAGTTTAGTGGCGGACGGGTGAGTAACGCGTGAGTAACCTGCCTTCAAGAGGGGGATAACGTTCTGAAAAGGACGCTAATACCGCATAACATATCGGAATCGCATGGTTCTGATATCAAAGATTTTATCGCTTGAAGATGG	S003455559	1	Firmicutes	Ruminococcaceae	RcHAPCR	1.15254	1.45713	1.26194	0.778342	12.1304	6.24789
>RcHCPXI	GATGAACGCCGGCGGTGTGCCTAATACATGCAAGTCGTACGCACTGGCCCAACTGATTGATGGTGCTTGCACCTGATTGACGATGGATCACCAGTGAGTGGCGGACGGGTGAGTAACACGTAGGTAACCTGCCCCGGAGCGGGGGATAACATTTGGAAACAGATGCTAATACCGCATAACAACAAAAGCCACATGGCTTTTGTTTGAAAGATGGCTTTGG	S000582106	1	Firmicutes	Lactobacillaceae	RcHCPXI	0	0	0.136426	0.338409	0.268817	0
>RcHGC40	GATGAACGCTAGCGGCAGGCTTAACACATGCAAGTCGAGGGGCAGCGGGGCGGAAGCTTGCTTTCGCCGCCGGCGACCGGCGCACGGGTGAGTAACACGTATGCAACCTGCCTCCGTCAGGGGGACAACCCGGCGAAAGCCGGGCTAATCCCCCGTACATCCCTTCCGGGGCATCCCGGGAGGGAGGAAAGGCTTCGGCCGGACGGGGATGGGCATGCGG	S002478293	0.887	Bacteroidetes	Porphyromonadaceae	RcHGC40	0	0	0	0	0.100806	0
>RcI0GRD	GATGAACGCTGGCGGCGTGCTTAACACATGCAAGTCGAACGGGGATCAATCTGACAGAGACTTCGGTTGAAGTTGTTTTGATCCTAGTGGCGGACGGGTGAGTAACGCGTGGGTAACCTGCCCCATACAGGGGGATAACAGCCAGAAATGGCTGCTAAAACCGCATAAGCGCACAGAGACGCATGTCTCAGTGTGAAAAACTCCGGTGGTATGGGATGGA	S001381162	1	Firmicutes	Lachnospiraceae	RcI0GRD	0	0	0	0	4.13306	2.43161
>RcI2GNM	GATGAACGCTGGCGGCATGCCTAATACATGCAAGTCGAACGGATATCTTCGGATATCAGTGGCGAACGGGTGAGTAACACGTAGATAACCTGCCCATACCCGGGGGATACGCTTTGGAAACGAAGTCTAAAACCCCATAGGAAAGAAGAAGGCATCTTCTTCTTTTGAAACAGGCGTTTGCCTGGGGGACGGATGGATCTGCGGTGCATTAGTTAGTTGG	S000584232	1	Firmicutes	Erysipelotrichaceae	RcI2GNM	0	0	0	0	5.40995	0.70922
>RcI7FIN	GATGAACGCTGGCAGCGTGCTTAACACATGCAAGTCGAACGGGGTGCTCATGACGGAGGATTCGTCCAACGGATTGAGTTACCTAGTGGCGGACGGGTGAGTAACGCGTGAGGAACCTGCCTTGGAGAGGGGATAACACTCCGAAAGGGGTGCTAATACCGCATGATGCAGTTGGGTCGCATGGCTCTGACTGCCAAAGATTTATCGCTCTGAGATGGCC	S000858226	0.933	Firmicutes	Ruminococcaceae	RcI7FIN	0	0	0	0	0.100806	0.168862
>RcIP87G	GATGAACGCTAGCGACAGGCTTAACACATGCAAGTCGAGGGGCAGCGGGGCTGAAGCTTGCTTCAGCTGCCGGCGACCGGCGCACGGGTGAGTAACACGTATGCAACCTGCCCTATGCAGGGGGATAACCGGAAGAAATTCCGACTAATACCGCATAACACCTCTGGAGGACATCCTCCGGAGGTCAAAGGAAGTGATTCCGGCATAGGATGGGCATGCG	S001380274	1	Bacteroidetes	Porphyromonadaceae	RcIP87G	0.779661	0	0	0	0.302419	0
>RcIVQNW	GATGAACGCTGGCGGCGTGCTTAACACATGCAAGTCGAACGGAGCACCCCTGACGGAGTTTTCGGACAACGAAAGGGAATGCTTAGTGGCGGACGGGTGAGTAACGCGTGAGTAACCTGCCTTGGAGTGGGGAATAACAGCCGGAAACGGCTGCTAATACCGCATGATGTATCTGGATCGCATGGTTCTGGATACCAAAGATTTATCGCTCTGAGATGGA	S003301754	1	Firmicutes	Ruminococcaceae	RcIVQNW	0	0	0.136426	0	0.436828	0.439041
>RcIZJE1	GATGAACGCTGGCGGCGTGCTTAACACATGCAAGTCGAACGGGGATTAATCTGACAGAGGCTTCGGTTGAAGTCGTTTTAATCCTAGTGGCGGACGGGTGAGTAACGCGTGGGTAACCTGCCCTGTACTGGGGGATAACAGCCAGAAATGGCTGCTAATACCGCATAAGCGCACAGAGACGCATGTCTCAGTGTGAAAAACTCCGGTGGTACAGGATGGA	S001380576	0.92	Firmicutes	Lachnospiraceae	RcIZJE1	0	0	0	0	0.907258	0
>RcJ1024	GACGAACGCTGGCGGCGTGCCTAACACATGCAAGTCGAACGGAGTCGAGCCCTTCGGGACTTGACTTAGTGGCGAACGGGTGAGTAACGCGTGAATAACCTGCCTTTCAGTGGGGGACAACAGTCGGAAACGACTGCTAATACCGCATGATACTTTTTGGAGGCATCTCTGAAAAGTCAAAGCTTTATGTGCTGAAAGATGGATTCGCGTCTGATTAGCT	S001126336	0.896	Firmicutes	Ruminococcaceae	RcJ1024	0	0	0	0	0.806452	0
>RcJICED	GATGAACGCTGGCGGCGTGCTTAACACATGCAAGTCGAACGAAGCACTTCTCCTTCTTCGGAAAGAGAGGTGACTGAGTGGCGGACGGGTGAGTAACGCGTGGGTAACCTGCCTCATACAGGGGGGATAACAGTTAGAAATGACTGCTAATACCGCATAAGCGCACAGGGCCGCATGGTCCGGTGTGAAAAACTGAGGTGGTATGAGATGGACCCGCGTC	S001380948	0.991	Firmicutes	Lachnospiraceae	RcJICED	0	0	0	0	0.134409	0
>RcJJP7L	GACGAACGCTGGCGGCGTGCCTAACACATGCAAGTCGAGCGGGGATGGCAAGGAGCTTGCTCCGGGTCATTCCAGCGGCGGACGGGTGAGTAACGCGTGAGCAACCTGGCTTTCACAGGGGGATAACGCATCGAAAGATGTGCTAATACCGCGTAAGACCACAGCATCACATGGTGCAGGGGTCAAAGGAGGAATCCGGTGAAAGATGGGCTCGCGTCCG	S002179701	0.848	Firmicutes	unclassified_Clostridiales	RcJJP7L	0.169492	0	0	0.439932	0.100806	0
>RcJL50T	GATGAATGCTGGCGGCGTGCCTAATACATGCAAGTCGAGCGGTAACAGGGCTTCACCGTTCTCTTGTCGCACTTGGCCTTTGAGCAAGTGATCTGATACGAGGGAACAGTGAAGCCGCTGACGAGCGGCGGACGGCTGAGTAACGCGTGGGAACATACCCTAAAGTGAGGGATAACTACTCGAAAGAGTGGCTAATACCGCATATGATCTTCGGATTAAA	S001380434	1	TM7	TM7_genera_incertae_sedis	RcJL50T	0	0	0	0.304569	0.134409	0.202634
>RfFPP85	GATGAACGCTAGCGACAGGCTTAACACATGCAAGTCGAGGGGCAGCACAGGTAGCAATACCGGGTGGCGACCGGCGCACGGGTGAGTAACGCGTATGCAACTTACCTATCAGAGGGGGATAACCCGGCGAAAGTCGGACTAATACCGCATGAAGCAGGGGCCCCGCATGGGGATATTTGCTAAAGATTCATCGCTGATAGATAGGCATGCGTTCCATTAG	S000516939	1	Bacteroidetes	Porphyromonadaceae	RfFPP85	0.610169	0.169434	0.341064	0.575296	0	3.98514
>RfGA795	GATGAACGCTAGCGACAGGCTTAACACATGCAAGTCGAGGGGCAGCGGGGAGAGTGTTCGCACTCTCCGCCGGCGACCGGCGCACGGGTGAGTAACACGTATGGAACCTGCCCTTTCCAGGGGGATAATCGGCGGAAACGCCGTCTAATACCGCGTATATGTCCGGGAGGCATCTCCGGGGCAGGAAAGGTCTTCGGGCCGGGAAAGGATGGCCATGCGG	S001379762	1	Bacteroidetes	Porphyromonadaceae	RfGA795	0	0	0	0	0	0.742992
>RfINVXN	GATGAACGCTAGCTACAGGCTTAACACATGCAAGTCGAGGGGCAGCATTAAAGTTTGCTTGCAAACTTTAGATGGCGACCGGCGCACGGGTGAGTAACACGTATCCAACCTGCCGATAACTCGGGGATAGCCTTTCGAAAGAAAGATTAATACCCGATGGTATATTTTCACCGCATGGTGAAACTATTAAAGAATTTCGGTTATCGATGGGGATGCGTTC	S000667790	1	Bacteroidetes	Bacteroidaceae	RfINVXN	0	0	0.306958	0	0	0.439041
>RfIUGOO	GACGAACGCTGGCGGCGCGCCTAACACATGCAAGTCGAACGGAGTTATAGGAACAGCTTGCTGGGAATATAACTTAGTGGCGGACGGGTGAGTAACACGTGAGCAACCTGCCTTTCAGAGGGGAATAACGTTTGGAAACGAACGCTAATACCGCATAACACCGGGGGATGGCATCATTTCCTGGTCAAAGATTTTATCGCTGAAAGATGGGCTCGCGTCC	S001381879	1	Firmicutes	Ruminococcaceae	RfIUGOO	0.644068	0.372755	0	0	0.235215	0.405268
>RfJCJC2	AACGAACGCTGGCGGCAGGTCTTAGGCATGCAAGTCGAACGGGTGAAGCAGAGCTTGCTCTGTGGATCTAGTGGCGCACGAGTGAGTAACGCGTGGGAAACTGCCCACCACTGGGGAATAACGTTTGGAAACGAACGCTAATACCGCATACGCCGGAAACGGGAAAGATTTATCGGTGGTGGATGTGCCCGCGTTGGATTAGCTTGTTGGTGGGGTAACG	S001603798	0.875	Proteobacteria	unclassified_"Proteobacteria"	RfJCJC2	0	0	0.136426	0.304569	0	0.101317
>RfJI0R0	GATAAACGCTGGCGGCGCACATAAGACATGCAAGTCGAACGGACTTAACCATTAGTTTACTATTGGAGCGGTTAGTGGCGGACTGGTGAGTAACACGTAAGCAACCTGCCTATCAGAGGGGAACAACAGTTAGAAATGACTGCTAATACCGCATATGCCTTGAGTATCACATGATACAAAAGGGAAAGGAGCAATCCGCTGATAGATGGGCTTGCGTCTG	S003455596	1	Firmicutes	Ruminococcaceae	RfJI0R0	0.135593	0	0.204638	0	0.100806	2.22898
>RfJKAYN	GACGAACGCTGGCGGCGTGCCTAACACATGCAAGTCGAGCGGGGATCATGTTGTGAAGTTTTCGGACGGAACGATATGATTCTAGCGGCGGACGGGTGAGTAACGCGTGAGCAACCTGCCCTCCACAGGGGATAACGCACCGAAAGGTGTGCTAATACCGCATAAGACCACAGTGGGGACATCCCACAGGGGTCAAAGGAGCAATCCGGTGGAAGATGGG	S003668566	1	Firmicutes	Lachnospiraceae	WcF1HVN	0.542373	0	6.30969	0	0	0
>WcF8R2N	GATTAACGCTGGCGGCGTGCCTAATACATGCAAGTCGAACGGAATTACCTTTGTGGTAATTTAGTGGCGAACGGGTGAGTAATACGTAGGTAACCTACCATTAAGACGAGGATAGCCATTGGAAACGATGGATAAGACTGGATAGGATAGAGGGAAGCATTTTCCTGTATTTAAAGGGAGCGATCTGCTTAATGAGGGGCCTGCGGCGCATTAGCTAGTT	S001381998	1	Tenericutes	Anaeroplasmataceae	WcF8R2N	0	0	0.238745	0	0	0
>WcFK36Q	GATGAACGCTGGCGGCGTGCCTAACACATGCAAGTCGAACGGGCATGCGCCTGAAACCTAGTGAAGGTGCATGCGAGTGGCGGACGGGTGAGTAACGCGTGGACAACCTGCCGCATGCAGGGGATACCGGCTGGAAACAGCCGCTAATACCGCATATGCGCACGAGGGCCGCATGGCCCGGTGCGGAAAGGGAGAAATCCCGGCATGCGATGGGTCCGCG	S001381546	0.966	Firmicutes	Lachnospiraceae	WcFK36Q	0	0	2.31924	0	0	0
>WcFTBXP	GATGAACGCTGGCGGCGTGCTTAACACATGCAAGTCGAACGGGGATGTCACGCTGACGAGACTTCGGTCAAATCTTGTGGCATCTTAGTGGCGGACGGGTGAGTAACGCGTGGGTAACCTGCCGTATACCGGGGGATAACACCTGGAAACAGGTGCTAATACCGCATAAGCGCACGGTCTCGCATGAGACAGTGTGAAAAACTCCGGTGGTATATGATGG	S001081068	1	Firmicutes	Lachnospiraceae	WcFTBXP	4.98305	4.06642	7.50341	3.35025	0	0.168862
>WcFW8Y3	GATGAACGCTGGCGGCGTGCTTAACACATGCAAGTCGAACGGAGTTATCATTTTTGAAGCGATTAGCTTGCTAAGAGTGGAAATGTTGATAACTTAGTGGCGGACGGGTGAGTAACGCGTGGGTAACCTGCCATATACAGGGGGATAACACTTAGAAATAGGTGCTAATACCGCATAAGCGCACAGAGCTGCATGGCTCAGTGTGAAAAACTCCGGTGGT	S001381686	0.972	Firmicutes	Lachnospiraceae	WcFW8Y3	0	0	1.90996	1.25212	0	0
>WcFZSBE	GATAAACGCTGGCGGCATGCCTAACACATGCAAGTCGAACGGGGTTTATGTGGCGGAACTCTCCGGAGGGAAAACATATAAACCTAGTGGCGGGCGGGTGAGTAACGCGTGGGGAACCTGCCCTGTACCGGGGGACAACAGCCAGAAATGGCTGCTAATACCGCATAATCCTGCGCTGCCGCATGGCAGCGCAGGGAAAACTCCGGTGGTACAGGATGGT	S001380949	0.933	Firmicutes	Lachnospiraceae	WcFZSBE	0	0	0.136426	0	0	0
>WcG4GQX	GATGAACGCTGGCGGCACGCCTAACACATGCAAGTCGAACGAGGTTAGTATGATTGAAGCTTCAGCTGATTGACTGCTAACCTAGTGGCGGACGGGTGAGTAACACGTGAGCAATCTGCCTTTCAGAGTGGGATACCGTTTGGAAACGAACGTTAATACCGCATAACGTAGCAAGGCCGCATGACCATGCTACCAAAGATTTTATCGCTGAAAGATGAGC	S001381605	1	Firmicutes	Ruminococcaceae	WcG4GQX	0	0	0.102319	0	0	0
>WcG568E	GATGAACGCTGGCGGCGTGCTTAACACATGCAAGTCGAGCGAAGCGTAGAAGCGGAATTTTTCGGAAGGAAGCTTCTGTGACTGAGCGGCGGACGGGTGAGTAACGCGTGGATAACCTGCCTCATACAGGGGATAACAGTTAGAAATGACTGCTAATACCGCATAAGCGCACGGGAACGCATGTTCTTGTGTGAAAAACTCCGGTGGTATGAGATGGATC	S003668611	0.774	Firmicutes	Lachnospiraceae	WcG568E	0	0	0.102319	0.101523	0	0
>WcGB328	GATGAACGCTAGCGACAGGCTTAACACATGCAAGTCGAGGGGCAGCGGGGCTGAAGCTTGCTTCAGCTGCCGGCGACCGGCGCACGGGTGAGTAACACGTATGCAACCTGCCCTATGCAGGGGATAACCGGAAGAAATTCCGACTAATACCGCATAACACAAGGGAAAGACATCTTTTCCTTGTCAAAGGAAGCGATTCCGGCATAGGATGGGCATGCGG	S001380141	0.991	Bacteroidetes	Porphyromonadaceae	WcGB328	0	2.91427	1.94407	3.21489	0	2.43161
>WcGB5J8	GATGAACGCTGGCGGCGTGCTTAACACATGCAAGTCGAACGAAGGCTTTACGACAGAACTCTTCGGAGGGAAGATGGAAAGACTTAGTGGCGGACGGGTGAGTAACGCGTGGGTAACCTGCCCCATACAGGGGAATAACAGCCGGAAACGGCTGCTAATGCCGCATAAGCGCACAGTACCGCATGGCACAGTGTGAAAAGCTCCGGCAGTATGGGATGGG	S001081017	0.906	Firmicutes	Lachnospiraceae	WcGB5J8	0	0	0.306958	0.169205	0	0
>WcGX85F	GATGAACGCTGGCGGCGTGCTTAACACATGCAAGTCGAACGAAGCACTTGAGGACGATTCTTCGGATGAGGACTTTTGTGACTTAGTGGCGGACGGGTGAGTAACGCGTGGGTAACCTGCCTCACACAGGGGGATAACAGTTGGAAACGACCGCTAATACCGCATAACCCGCTGGTGCCGCATGGCACTGACGGAAAAGATTTTATCGGTGTGAGATGGA	S002478502	0.915	Firmicutes	Lachnospiraceae	WcGX85F	0	0	0.272851	0.135364	0	0
>WcH1LY5	GATGAACGCTGGCGGCGTGCTTAACACATGCAAGTCGAACGAGAATCTACGGAAAGAGGCTTCGGCCAATGGAAATAGAGGAAAGTGGCGGACGGGTGAGTAACGCGTGAGCAATCTGCCTTGGAGTGGGGAATAACAGTTGGAAACAGCTGCTAATACCGCATGATACAGTTGGGTCGCATGGCTCTGACTGTCAAAGATTTATCGCTCTGAGATGAGC	S001381762	1	Firmicutes	Ruminococcaceae	WcH1LY5	0	0.84717	1.84175	1.69205	0	0
>WcH5G9A	GATGAACGCTGGCGGCGTGCCTAACACATGCAAGTCGAACGGGAATAGAAGGAAACCTAGTGAATTCTATTTTAGTGGCGGACGGGTGAGTAACGCGTGGGCAACCTGCCCCATACCGGGGGATACCAGCCGGAAACGGCTGCTAAAACCGCATAAGCGCACAGTATCGCATGGTACAGTGTGAAAAACTCCGGTGGTATGGGATGGGCCCGCGTCCGAT	S001381734	0.958	Firmicutes	Lachnospiraceae	WcH5G9A	0	0	0.136426	0	0	0
>WcH84TO	GACGAACGCTGGCGGCGCGCCTAACACATGCAAGTCGAACGGGGCGTTATCAGCTGAAGTTTTCGGATGGAAGCAGGTAACGCTTAGTGGCGAACGGGTGAGTAACACGTGAGGAACCTGCCCCAGAATGGGGGACAACAGTTGGAAACGACTGCTAATACCGCATAAGCCCACAGTACCGCATGGTACAGGGGGAAAAGGAGCAATCCGTTTTGGGATG	S001011582	0.943	unclassified_Bacteria	unclassified_Bacteria	WcH84TO	0	0	0.47749	0.101523	0	0
>WcH8R54	GATGAACGCTAGCGACAGGCTTAACACATGCAAGTCGAGGGGCATCGGGGGTGAAAGCTTGCTTTCACCTGCCGGCGACCGGCGCACGGGTGAGTAACACGTATGCAACCTGCCCTCCACTGGGGGATAAGCGGAAGAAATTCCGTCTAATACCGCATAACAACCCGAGGGGACATCCCCTTGGGTTTAAAGGAGTGATCCGGTGGCGGATGGGCATGCG	S001381749	1	Bacteroidetes	Porphyromonadaceae	WcH8R54	0	1.59268	0.716235	1.99662	0	0
>WcHEFWK	GATGAACGCTAGCGACAGGCCTAACACATGCAAGTCGAGGGGCATCGGGGCTAGGAGCTATCCTTGCCGCCGGCGACCGGCGCACGGGTGAGTAACGCGTATGCGACCTGCCCGTTGCAGGGGGATAATCGGGAGAAATCCCGTCTAATACCGCGTAACGCCGCGGGCTGCATGGCCCTGCGGCCAAAGGGAGCGATTCCGGCAACGGATGGGCATGCGT	S001380149	0.986	Bacteroidetes	Porphyromonadaceae	WcHEFWK	0	0	0.204638	0.37225	0	0
>WcI1EWF	GATGAACGCTGGCGGCGTGCTTAACACATGCAAGTCGAACGGGGCCAAGGGGAGCTTGCTTTTCTTGGCTTAGTGGCGGACGGGTGAGTAACGCGTGGATAACCTGGCCCATACAGGGGGATAGCAGCTGGAAACGGCTGGTAAGACCGCATAAGCGCACGGAGGCGCATGCTTCTGTGTGAAAAGCTCCGGTGGTATGGGATGGGTCCGCGTCTGATTA	S001011671	0.751	Firmicutes	Lachnospiraceae	WcI1EWF	0	0	0.170532	0	0	0
>WcI355N	GATGAACGCTGGCGGCGTGCTTAACACATGCAAGTCGAACGGACGTAGCAATACGTTAGTGGCGGACGGGTGAGTAACGCGTGAGCAATCTGCCCATATCAGGGGAATAACAGTTAGAAATGACTGCTAATACCGCATAGGACCACGGGAAGGCATCTTCCTGCGGTGAAAGATTTATCGGATATGGATGAGCTCGCGTCCCATTAGGTAGTTGGTGAGG	S002276937	0.836	Firmicutes	unclassified_Clostridiales	WcI355N	0	0	0.136426	0	0	0
>WcI9AEC	GATGAACGCTGGCGGCGTGCTTAACACATGCAAGTCGAACGGGGTTATCATTTTTGAAGCGATCAGTTTACTGAGAGTGGAAATGTTGATAACCTAGTGGCGGACGGGTGAGTAACGCGTGGGTAACCTGCCGTATACCGGGGATAACACCTGGAAACAGGTGCTAATACCGCATAAGCGCACGGGACCGCATGGTCTAGTGTGAAAAACTCCGGTGGTA	S001381869	0.92	Firmicutes	Lachnospiraceae	WcI9AEC	0.135593	0	6.8895	0	0	0
>WcIFRMK	GATGAACGCTGGCGGCGTGCTTAACACATGCAAGTCGAACGAAGCGTTTGAGAACGATTCTTCGGATGAGTTTTCTTATGACTGAGTGGCGGACGGGTGAGTAACGCGTGGGTAACCTGCCCTATACAGGGGGATAACAGTTAGAAATGACTGCTAATACCGCATAAGCGCACGGAATCGCGTGGTTCAGTGTGAAAAACTGAGGTGGTATAGGATGGAC	S001380987	0.915	Firmicutes	Lachnospiraceae	WcIFRMK	0	0	0.306958	0.169205	0	0
>WcINFOS	GATGAACGCTGGCGGCGTGCCTAACACATGCAAGTCGAACGGACTTAACTTGAAACCTAGTGATTGTTAAGTTAGTGGCGGACGGGTGAGTAACGCGTGGATAACCTGCCGTATGCAGGGGGATAACAGCTGGAAACAGCTGCTAATACCGCATAAGCGCACGGTACCGCATGGTACAGTGTGAAAAGATTTATCGGCATACGATGGATCCGCGTCCGAT	S001379702	0.966	Firmicutes	Lachnospiraceae	WcINFOS	0	0	0.545703	0.203046	0	0
>WcITJLS	ATGAACGCTGGCGGCGTGCCTAACACATGCAAGTCGGACGGGCATGCGCGCGGGAAGGCCACGGCCGGAAGGCGCGCATGCGAGTGGCGGACGGGTGAGTAACGCGTGGGCAACCTGCCCCGTGCTGGGGATAACACCTGGAAACAGGTGCTAATACCGCACAAGCGCGCGGCGGCGCATGCCGCGGCGCGGAAAGCCGGAAGGCGGCACGGGATGGGCC	S001381916	0.995	Firmicutes	Lachnospiraceae	WcITJLS	0	0	0.204638	0	0	0
>WcIVIQP	GATGAACGCTGGCGGCGTGCTTAACACATGCAAGTCGAACGATTAAACTGGCTTCGGCCAGATATAGAGTGGCGAACGGGTGAGTAACACGTGACCAACCTGCCCCGCGCTCCGGGACAACCGCTGGAAACGGCGGCTAATACCGGATGCTCCGGGGAGGCCCATGGCCTCCCCGGGAAAGCCTTAACGGCGCGGGATGGGGTCGCGGCCCATTAGGTAG	S000964266	0.909	Actinobacteria	Coriobacteriales	WcIVIQP	0	0	0.375171	0.135364	0.336022	0.202634
>WcIVPYC	GACGAACGCTGGCGGCGTGCTTAACACATGCAAGTCGAACGGAGCACCCCTGAAGGAGTTTTCGGACAACGGAAGGGAATGCTTAGTGGCGGACTGGTGAGTAACGCGTGAGGAACCTGCCTTCCAGAGGGGGACAACGGTTGGAAACGACTGCTAATACCGCATGACATATTCTAATCGCATGGTTGGAATATCAAAGATTTATCGCTGGAAGATGGCC	S001380280	0.981	Firmicutes	Ruminococcaceae	WcIVPYC	0	0	0.716235	0	0	0
>WcJCBD3	GATGAACGCTGGCGGCGTGCTTAACACATGCAAGTCGAACGGGGATGCATCTGGAAGGTGTGCTTGCACATTGGAAGGATGTATCCTAGTGGCGGACGGGTGAGTAACGCGTGGGTAACCTGCCCCATACCGGGGATACCACCTGGAAACAGGTGCTAATACCGCATAAGCGCACAAAGGCGCATGCCTTAGTGTGAAAAACTCCGGTGGTATGGGATGG	S001381713	0.886	Firmicutes	Lachnospiraceae	WcJCBD3	0	0	0.204638	0	0	0
>WcJMJC4	GATGAACGCTGGCGGCGTGCTTAACACATGCAAGTCGAGCGAAGCGTTTCTGCGGAATTTTTCGGAAGGAAGCGGGGATGACTTAGCGGCGGACGGGTGAGTAACGCGTGGGTAACCTGCCCCATACAGGGGGATAACAGTTAGAAATGACTGCTAAGACCGCATAAGCGCACGGGAGCGCATGCTTCTGTGTGAAAAACTCCGGTGGTATGGGATGGAC	S001381050	1	Firmicutes	Lachnospiraceae	WcJMJC4	0	0	0.204638	0	0	0
>WcJOE9A	GACGAACGCTGGCGGCACGCTTAACACATGCAAGTCGAACGGACGAGAGAGAGCTTGCTCTCTCAAGTTAGTGGCGGACGGGTGAGTAACACGTGAGCAACCTGCCTTTAAGAGTGGGATAACGGTCGGAAACGACCGCTAATACCGCATAATATACTTGTATCGCATGGTATGGGTATCAAAGATTTATCGCTTAAAGATGGGCTCGCGTCTGATTAGC	S001379805	1	Firmicutes	Ruminococcaceae	WcJOE9A	0	0	0.443383	0.406091	0	0
>WfF2K7F	GATGAACGCTGGCGGCATGCCTAACACATGCAAGTCGAACGGGGTTTATATAACGGAACTCCCCGGAGGGAAGATATATAAACCTAGTGGCGGACGGGTGAGTAACGCGTGGGCAACCTGCCCTGTACCGGGGACAACAGCCAGAAATGGCTGCTAATACCGCATAAGCCTGCTGTGCCGCATGGCACAGCAGGGAAACCACGGTGGTACAGGATGGGCC	S000763101	0.958	Firmicutes	Lachnospiraceae	WfF2K7F	0	0	0	2.16582	0	0
>WfFKX2D	GATGAACGCTGGCGGCGTGCTTAACACATGCAAGTCGAACGGGTATTTCGAATGAGACTTCGGTGGATTTTGAGATACCTAGTGGCGGACGGGTGAGTAACGCGTGGGCAACCTGCCCTGTACAGGGGGACAACAGCTGGAAACGGCTGCTAATACCGCATAAGCGCACAGGACCGCATGGTCTGGTGTGAAAAACTCCGGTGGTACAGGATGGGCCCGG	S001381046	0.957	Firmicutes	Lachnospiraceae	WfFKX2D	0	0	0	0.37225	0	0
>WfFM8CY	GACGAACGCTGGCGGCGTGCCTAATACATGCAAGTCGAGCGAGCTGAACCAGCAGATTCACTTCGGTGATGACGCTGGGAACGCGAGCGGCGGATGGGTGAGTAACACGTGGGTAACCTGCCCTAAAGTCTGGGATACCACTTGGAAACAGGTGCTAATACCGGATAACAACAATAGCTGCATGGCTATTGCTTAAAAGGCAGCGAAAGCTGTCGCTAAA	S000100640	0.976	Firmicutes	Lactobacillaceae	WfFM8CY	0	0	0	0.203046	0	0
>WfFWOR8	GGACGAACGCTGGCGGCATGCCTAACACATGCAAGTCGAACGGGGATACAAGAGCTTGCTTTTTGTATCTTAGTGGCGGACGGGCGAGTAACGCGTGAGCAACCTGCCCTTCAGTGGGGAATAACGTCGTGGAAACGGACGCTAATACCGCATAACACAACGGAGCCGCATGACTTTGTTGGTCAAAGGATTTATTCGCTGAAGGATGGGCTCGCGTCCG	S000814012	0.901	Firmicutes	Ruminococcaceae	WfFWOR8	0	0	0	0.135364	0	0
>WfFWSGN	GACGAACGCTGGCGGCGTGCCTAACACATGCAAGTCGAGCGGGGAATCGTGGAATGAAGCTTCGGCAGAAGGAAGCGGTTTCTAGCGGCGGACGGGTGAGTAACGCGTGAGCAATCTGCCTTTCACAGGGGGGATAACACACCGAAAGGTGTACTAATACCGCATGAGACCACGGGGAGGACATCTTCCAGGGGTCAAAAGGAGCAATCCGGTGAAAGAT	S001380604	0.91	Firmicutes	unclassified_Clostridiales	WfFWSGN	0	0	0	0.101523	0	0
>WfFZ4KM	GATGAACGCTAGCTACAGGCTTAACACATGCAAGTCGAGGGGCAGCATTTTAGTTTGCTTGCAAACTAAAGATGGCGACCGGCGCACGGGTGAGTAACACGTATCCAACCTGCCGATAACTCGGGGATAGCCTTTCGAAAGAAAGATTAATATCCGATAGTATATTAAAACCGCATGGTTTTACTATTAAAGAATTTCGGTTATCGATGGGGATGCGTTC	S000360393	1	Bacteroidetes	Bacteroidaceae	WfFZ4KM	0	0	0	0.203046	0	0
>WfG3SUS	GATGAACGCTGGCGGCGTGCCTAATACATGCAAGTCGAGCGAACCACTTCGGTGGGAAGCGGCGAACGGGTGAGTAACACGTAGGTGATCTGCCCATCAGACGGGGACAACGATTGGAAACGATCGCTAATACCGGATAGGACGAAAGTTTAAAGATGCTCCTGGCATCACTGATGGATGAGCCTGCGGCGCATTAGCTAGTTGGTGGGGTAAAGGCCTA	S000582664	1	Firmicutes	Erysipelotrichaceae	WfG3SUS	0	0	0	0.541455	0.302419	0.101317
>WfG91W0	GATGAACGCCGGCGGTGTGCCTAATACATGCAAGTCGAGCGCACTGGCCCAACTGATATGACGTGCTTGCACTGAATTGACGTTGGATTCCCAGTGAGCGGCGGACGGGTGAGTAACACGTGGGCAACCTGCCCTGAAGCGGGGGATAACATCTGGAAACAGGTGCTAATACCGCATAACAACGAAACCACATGGTTTTCGTTTCAAAGATGGTTTCGGC	S000536215	0.986	Firmicutes	Lactobacillaceae	WfG91W0	0	0	0	0.406091	0	0
>WfGCLNN	GATGAACGCTGGCGGCGTGCTTAACACATGCAAGTCGAACGGGAATGGCACAGCGGGGAGATTTCGGTCAAGCCAAGTGCCGTTTTAGTGGCGGACGGGTGAGTAACGCGTGGGTAACCTGCCTCACACAGGGGGATAACGACTTAGAAATAGGTGCTAATACCGCATAAGCGCACGGGACTGCATGGTCCAGTGTGAAAAGCCCCGGCGGTGTGAGATG	S001381877	0.967	Firmicutes	Lachnospiraceae	WfGCLNN	0	0	0	0.406091	0	0
>WfGDDIE	GATGAACGCTGGCGGCGTGCCTAACACATGCAAGTCGAACGATGAAGACGCCCTCGGGCGTGTATGAAGTGGCGAACGGGTGAGTAACACGTGACCAACCTGCCCCGGGCCCCGGGACAACCGCCGGAAACGGCGGCTAATACCGGGTACTCCGGGCCGGCCGCATGGCCGGCCCGGGAAAGCCCAGACGGCCCGGGATGGGGTCGCGGCCCATTAGGTA	S000580739	0.773	Actinobacteria	Coriobacteriales	WfGDDIE	0	0	0	0.135364	0	0
>WfGMCQR	GATGAACGCTAGCTACAGGCTTAACACATGCAAGTCGCGGGGCAGCATGTACGACCCTTCGGGGTAGTATGATGGCGACCGGCGCACGGGTGAGTAACGCGTATCCAACCTGCCCGTCACCACGGGATAGCCTGCCGAAAGGCAGATTAATACCGTATGTAGTCCGGAGACGGCATCAGATCCGGACTAAAGGCTCAGCGGTGACGGATGGGGATGCGTC	S001380751	0.92	Bacteroidetes	Prevotellaceae	WfGMCQR	0	0	0.238745	0.135364	0	0
>WfGO5Y2	GATGAACGCTGGCGGCGTGCTTAACACATGCAAGTCGAATGTAGCAATACATGGCGGACGGGTGAGTAACGCGTGAGCAATCTGCCCATGTCTGGGGAATAACAGTTGGAAACGACTGATAATACCGCATAAGACCACAGGAAGGCATCTTCCAGGGGTAAAAGATTTATCGGATATGGATGAGCTCGCGTCTGATTAGCTTGTTGGTGAGGTAACGGCC	S001006919	1	Firmicutes	unclassified_Clostridiales	WfGO5Y2	0	0	0	0.169205	0	0
>WfGV4JB	GATGAACGCTGGCGGCGTGCTTAACACATGCAAGTCGAACGGAGTTACAATGAAACCTAGTGATTTGTAACTTAGTGGCGGACGGGTGAGTAACGCGTGGGGTAACCTGCCGTATACAGGGGGGATAACACTTAGAAATAGGTGGCTAATACCGCATAAGCGCACAGGACCGCATGGTCGAGTGTGAAAAACTTCGGTGGTATACGATGGACCCGCGTCT	S001380787	0.953	Firmicutes	Lachnospiraceae	WfGV4JB	0	0	0	0.270728	0	0
>WfGXP7O	GACGAACGCTGGCGGCGTGCCTAACACATGCAAGTCGAACGAGAAATTCATTTGTGATCCCTTCGGGGTGAACTGTTGAATGGAAAGTGGCGGACGGGCGAGTAACGCGTGAGTAACCTGCCCATAAGAGGGGGATAATCCTTGGAAACGAGGACTAATACCGCATATTGAAATGGAATCGCATGGTTTCATTTTGAAAGATTTATCGCTTATGGATGGA	S000760940	0.843	Firmicutes	Ruminococcaceae	WfGXP7O	0	0.135547	0	0.135364	0	0
>WfGXYSD	GATGAACGCTGGCGGCGTGCTTAACACATGCAAGTCGAACGGGGATGCATTTGGAAGGTGTGCTTGCATACCGGAAGGATGTATCCTAGTGGGCGACGGTGAGTAACGCGTGGTAACCTGCCTCATACAGGGGAGTACCACCTGGAAACAGGTGCTAATACCGCATAAGCGCACGAGGACGCATGTTTTTGTGTGAAAAACTTAGGTGGTATGAGATGGA	S001380989	0.92	Firmicutes	Lachnospiraceae	WfGXYSD	0	0	0	0.135364	0	0
>WfGYFLM	GATGAACGCTGGCGGCGTGCTTAACACATGCAAGTCGAACGGGATCCCTGGCAGCTTGCTGCCGGGGTGAGAGTGGCGAACGGGTGAGTAATGCGTGACCGACCTGCCCCATGCACCGGAATAGCTCCTGGAAACGGGTGGTAATGCCGGATGTTCCACATGAGCGCATGCGAGTGTGGGAAAGGCTTTTTTGCGGCATGGGATGGGGTCGCGTCCTATC	S000414127	0.99	Actinobacteria	Bifidobacteriales	WfGYFLM	0	0	0	1.28596	0	0

## Sheet: Table 2
		SEED I	SEED II	SEED III	SEED IV	Cecal AC	Cecal WB	Cecal RS	Fecal AC	Fecal WB	Fecal RS
1	SEED	Amino Acids and Derivatives	Lysine, threonine, methionine, and cysteine.1	Threonine_and_Homoserine_Biosynthesis	Aspartate aminotransferase (EC 2.6.1.1)	0.232777	0.195645	0.2761	0.252465	0.281574	0.22338
2	SEED	Amino Acids and Derivatives	Alanine, serine, and glycine	Alanine_biosynthesis	Cysteine desulfurase (EC 2.8.1.7)	0.250683	0.271379	0.212827	0.270498	0.260971	0.17374
3	SEED	Amino Acids and Derivatives	Lysine, threonine, methionine, and cysteine.1	Methionine_Degradation	S-adenosylmethionine synthetase (EC 2.5.1.6)	0.161153	0.151467	0.224331	0.22842	0.254103	0.14892
4	SEED	Amino Acids and Derivatives	Arginine	urea cycle, polyamines	Cyanophycin_Metabolism	0.174583	0.16409	0.195571	0.192354	0.0755443	0.204765
5	SEED	Amino Acids and Derivatives	Arginine	urea cycle, polyamines	Arginine_Biosynthesis_extended	0.085053	0.151467	0.235835	0.22842	0.0961472	0.167535
6	SEED	Amino Acids and Derivatives	Branched-chain amino acids	Leucine_Biosynthesis	2-isopropylmalate synthase (EC 2.3.3.13)	0.188012	0.214579	0.201323	0.102188	0.0549413	0.16133
7	SEED	Amino Acids and Derivatives	Lysine, threonine, methionine, and cysteine.1	Threonine_and_Homoserine_Biosynthesis	Aspartokinase (EC 2.7.2.4)	0.134294	0.170401	0.143802	0.186343	0.130486	0.14892
8	SEED	Amino Acids and Derivatives	Lysine, threonine, methionine, and cysteine.1	Methionine_Degradation	Methionine ABC transporter ATP-binding protein	0.196965	0.170401	0.0747771	0.144265	0.137353	0.179945
9	SEED	Amino Acids and Derivatives	Alanine, serine, and glycine	Serine_Biosynthesis	D-3-phosphoglycerate dehydrogenase (EC 1.1.1.95)	0.129818	0.107289	0.13805	0.16831	0.178559	0.13651
10	SEED	Amino Acids and Derivatives	Branched-chain amino acids	Branched-Chain_Amino_Acid_Biosynthesis	Dihydroxy-acid dehydratase (EC 4.2.1.9)	0.188012	0.145156	0.218579	0.132243	0.0755443	0.0930752
11	SEED	Amino Acids and Derivatives	Alanine, serine, and glycine	Glycine_Biosynthesis	Serine hydroxymethyltransferase (EC 2.1.2.1)	0.138771	0.138845	0.178315	0.144265	0.11675	0.105485
12	SEED	Amino Acids and Derivatives	Alanine, serine, and glycine	Glycine_and_Serine_Utilization	Seryl-tRNA synthetase (EC 6.1.1.11)	0.102959	0.0883559	0.189819	0.186343	0.109883	0.130305
13	SEED	Amino Acids and Derivatives	Lysine, threonine, methionine, and cysteine.1	Methionine_Biosynthesis	5-methyltetrahydrofolate--homocysteine methyltransferase (EC 2.1.1.13)	0.094006	0.0946671	0.172563	0.156288	0.109883	0.117895
14	SEED	Amino Acids and Derivatives	Branched-chain amino acids	Isoleucine_degradation	Branched-chain amino acid aminotransferase (EC 2.6.1.42)	0.0581942	0.157778	0.13805	0.102188	0.171692	0.105485
15	SEED	Amino Acids and Derivatives	Arginine	urea cycle, polyamines	Arginine_and_Ornithine_Degradation	0.183536	0.16409	0.115042	0.108199	0.0618089	0.0496401
16	SEED	Amino Acids and Derivatives	Lysine, threonine, methionine, and cysteine.1	Lysine_Biosynthesis_DAP_Pathway	Diaminopimelate decarboxylase (EC 4.1.1.20)	0.0716236	0.119912	0.10929	0.126232	0.103015	0.130305
17	SEED	Amino Acids and Derivatives	Branched-chain amino acids	Leucine_Biosynthesis	3-isopropylmalate dehydratase large subunit (EC 4.2.1.33)	0.102959	0.126223	0.126546	0.0540995	0.137353	0.105485
18	SEED	Amino Acids and Derivatives	Arginine	urea cycle, polyamines	Arginine_Biosynthesis_extended	0.0805766	0.0694225	0.143802	0.0721327	0.0892796	0.192355
19	SEED	Amino Acids and Derivatives	Alanine, serine, and glycine	Serine_Biosynthesis	Phosphoserine aminotransferase (EC 2.6.1.52)	0.0716236	0.0631114	0.149554	0.108199	0.103015	0.142715
20	SEED	Amino Acids and Derivatives	Lysine, threonine, methionine, and cysteine.1	Threonine_and_Homoserine_Biosynthesis	Threonine synthase (EC 4.2.3.1)	0.120865	0.0820448	0.0805292	0.102188	0.164824	0.0868702
21	SEED	Amino Acids and Derivatives	Lysine, threonine, methionine, and cysteine.1	Threonine_and_Homoserine_Biosynthesis	Aspartate-semialdehyde dehydrogenase (EC 1.2.1.11)	0.0895295	0.0694225	0.132298	0.108199	0.11675	0.11169
22	SEED	Amino Acids and Derivatives	Lysine, threonine, methionine, and cysteine.1	Methionine_Biosynthesis	Cysteine synthase (EC 2.5.1.47)	0.0805766	0.0757337	0.149554	0.096177	0.0755443	0.130305
23	SEED	Amino Acids and Derivatives	Arginine	urea cycle, polyamines	Polyamine_Metabolism	0.0895295	0.0504891	0.0977854	0.0601106	0.109883	0.142715
24	SEED	Amino Acids and Derivatives	Lysine, threonine, methionine, and cysteine.1	Cysteine_Biosynthesis	Sulfate permease	0.0537177	0.113601	0.0862813	0.0661217	0.11675	0.11169
25	SEED	Amino Acids and Derivatives	Lysine, threonine, methionine, and cysteine.1	Lysine_Biosynthesis_DAP_Pathway	Dihydrodipicolinate synthase (EC 4.2.1.52)	0.0671471	0.138845	0.0747771	0.0721327	0.109883	0.0806652
26	SEED	Amino Acids and Derivatives	Histidine Metabolism	Histidine_Biosynthesis	Histidinol-phosphate aminotransferase (EC 2.6.1.9)	0.111912	0.0568003	0.0862813	0.132243	0.0618089	0.0744602
27	SEED	Amino Acids and Derivatives	Glutamine, glutamate, aspartate, asparagine	ammonia assimilation	Glutamate_dehydrogenases	0.0313353	0.0252446	0.0977854	0.0601106	0.144221	0.13651
28	SEED	Amino Acids and Derivatives	Lysine, threonine, methionine, and cysteine.1	Lysine_Biosynthesis_DAP_Pathway	L,L-diaminopimelate aminotransferase (EC 2.6.1.83)	0.0716236	0.107289	0.0920334	0.0360664	0.0755443	0.0992802
29	SEED	Amino Acids and Derivatives	Proline and 4-hydroxyproline	Proline_Synthesis	Gamma-glutamyl phosphate reductase (EC 1.2.1.41)	0.0492412	0.107289	0.0977854	0.0601106	0.0480736	0.117895
30	SEED	Amino Acids and Derivatives	Arginine	urea cycle, polyamines	Arginine_Biosynthesis_extended	0.0447648	0.0378668	0.0517688	0.096177	0.0892796	0.14892
31	SEED	Amino Acids and Derivatives	Alanine, serine, and glycine	Glycine_cleavage_system	Sodium/glycine symporter GlyP	0.0895295	0.113601	0.0862813	0.0721327	0.0618089	0.0310251
32	SEED	Amino Acids and Derivatives	Arginine	urea cycle, polyamines	Arginine_Biosynthesis_extended	0.0402883	0.0820448	0.069025	0.0901659	0.0892796	0.0744602
33	SEED	Amino Acids and Derivatives	Proline and 4-hydroxyproline	Proline_Synthesis	Pyrroline-5-carboxylate reductase (EC 1.5.1.2)	0.0492412	0.0883559	0.0632729	0.0721327	0.0824119	0.0868702
34	SEED	Amino Acids and Derivatives	Proline and 4-hydroxyproline	Proline_Synthesis	Glutamate 5-kinase (EC 2.7.2.11)	0.094006	0.0757337	0.0632729	0.0841548	0.0618089	0.0620501
35	SEED	Amino Acids and Derivatives	Arginine	urea cycle, polyamines	Arginine_and_Ornithine_Degradation	0.0671471	0.119912	0.0575209	0.0601106	0.0618089	0.0744602
36	SEED	Amino Acids and Derivatives	Branched-chain amino acids	Leucine_Biosynthesis	3-isopropylmalate dehydrogenase (EC 1.1.1.85)	0.102959	0.0378668	0.10929	0.0601106	0.0549413	0.0744602
37	SEED	Amino Acids and Derivatives	Histidine Metabolism	Histidine_Biosynthesis	Histidinol dehydrogenase (EC 1.1.1.23)	0.0671471	0.100978	0.0977854	0.0540995	0.0480736	0.0682552
38	SEED	Amino Acids and Derivatives	Glutamine, glutamate, aspartate, asparagine	ammonia assimilation	Glutamine,_Glutamate,_Aspartate_and_Asparagine_Biosynthesis	0.0492412	0.0694225	0.0460167	0.108199	0.0549413	0.105485
39	SEED	Amino Acids and Derivatives	Lysine, threonine, methionine, and cysteine.1	Lysine_Biosynthesis_DAP_Pathway	Dihydrodipicolinate reductase (EC 1.3.1.26)	0.094006	0.0757337	0.0632729	0.0540995	0.0549413	0.0868702
40	SEED	Amino Acids and Derivatives	Histidine Metabolism	Histidine_Biosynthesis	Histidinol-phosphatase (EC 3.1.3.15)	0.085053	0.0757337	0.0747771	0.0540995	0.0824119	0.0558451
41	SEED	Amino Acids and Derivatives	Lysine, threonine, methionine, and cysteine.1	Methionine_Biosynthesis	Serine acetyltransferase (EC 2.3.1.30)	0.0223824	0.0694225	0.0805292	0.0480885	0.0755443	0.1241
42	SEED	Amino Acids and Derivatives	Lysine, threonine, methionine, and cysteine.1	Threonine_and_Homoserine_Biosynthesis	Homoserine dehydrogenase (EC 1.1.1.3)	0.0581942	0.0820448	0.0747771	0.0901659	0.041206	0.0682552
43	SEED	Amino Acids and Derivatives	Glutamine, glutamate, aspartate, asparagine	ammonia assimilation	Glutamine,_Glutamate,_Aspartate_and_Asparagine_Biosynthesis	0.0537177	0.0631114	0.0460167	0.0781438	0.0618089	0.105485
44	SEED	Amino Acids and Derivatives	Lysine, threonine, methionine, and cysteine.1	Lysine_Biosynthesis_DAP_Pathway	Diaminopimelate epimerase (EC 5.1.1.7)	0.0492412	0.0378668	0.120794	0.0540995	0.0549413	0.0868702
45	SEED	Amino Acids and Derivatives	Aromatic amino acids and derivatives	Aromatic_amino_acid_interconversions_with_aryl_acids	Phenylacetate-coenzyme A ligase (EC 6.2.1.30)	0.0537177	0.044178	0.120794	0.0540995	0.020603	0.0868702
46	SEED	Amino Acids and Derivatives	Histidine Metabolism	Histidine_Degradation	Urocanate hydratase (EC 4.2.1.49)	0.094006	0.044178	0.0402646	0.0721327	0.0480736	0.0744602
47	SEED	Amino Acids and Derivatives	Arginine	urea cycle, polyamines	Arginine_Biosynthesis_extended	0.0492412	0.0504891	0.069025	0.0781438	0.0480736	0.0744602
48	SEED	Amino Acids and Derivatives	Histidine Metabolism	Histidine_Degradation	Histidine ammonia-lyase (EC 4.3.1.3)	0.0537177	0.044178	0.0172563	0.0540995	0.130486	0.0682552
49	SEED	Amino Acids and Derivatives	Alanine, serine, and glycine	Serine_Biosynthesis	Phosphoserine phosphatase (EC 3.1.3.3)	0.0358118	0.0252446	0.0632729	0.0601106	0.0961472	0.0868702
50	SEED	Amino Acids and Derivatives	Lysine, threonine, methionine, and cysteine.1	Threonine_degradation	Threonine dehydratase (EC 4.3.1.19)	0.0626707	0.0504891	0.0460167	0.0661217	0.0892796	0.0310251
51	SEED	Amino Acids and Derivatives	Lysine, threonine, methionine, and cysteine.1	Threonine_degradation	Low-specificity L-threonine aldolase (EC 4.1.2.5)	0.0671471	0.0757337	0.0575209	0.0360664	0.0686766	0.0372301
52	SEED	Amino Acids and Derivatives	Lysine, threonine, methionine, and cysteine.1	Threonine_and_Homoserine_Biosynthesis	Predicted functional analog of homoserine kinase (EC 2.7.1.-)	0.0358118	0.0694225	0.10929	0.0300553	0.0274706	0.0682552
53	SEED	Amino Acids and Derivatives	Lysine, threonine, methionine, and cysteine.1	Lysine_Biosynthesis_DAP_Pathway	Meso-diaminopimelate D-dehydrogenase (EC 1.4.1.16)	0.0671471	0.0189334	0.0517688	0.0781438	0.0343383	0.0682552
54	SEED	Amino Acids and Derivatives	Histidine Metabolism	Histidine_Biosynthesis	Imidazole glycerol phosphate synthase cyclase subunit (EC 4.1.3.-)	0.0268589	0.044178	0.0920334	0.0540995	0.020603	0.0806652
55	SEED	Amino Acids and Derivatives	Arginine	urea cycle, polyamines	Polyamine_Metabolism	0.0492412	0.0631114	0.0345125	0.0480885	0.0961472	0.0248201
56	SEED	Amino Acids and Derivatives	Lysine, threonine, methionine, and cysteine.1	Cysteine_Biosynthesis	Cys regulon transcriptional activator CysB	0.0358118	0.100978	0.069025	0.0420774	0.041206	0.00620501
57	SEED	Amino Acids and Derivatives	Aromatic amino acids and derivatives	Aromatic_amino_acid_interconversions_with_aryl_acids	Indolepyruvate oxidoreductase subunit IorA (EC 1.2.7.8)	0.0581942	0.0568003	0.0402646	0.0540995	0.0480736	0.0310251
58	SEED	Amino Acids and Derivatives	Histidine Metabolism	Histidine_Biosynthesis	Imidazoleglycerol-phosphate dehydratase (EC 4.2.1.19)	0.0358118	0.0631114	0.0345125	0.0420774	0.0686766	0.0372301
59	SEED	Amino Acids and Derivatives	Glutamine, glutamate, aspartate, asparagine	ammonia assimilation	Glutamine,_Glutamate,_Aspartate_and_Asparagine_Biosynthesis	0.0447648	0.044178	0.0287604	0.0841548	0.0480736	0.01241
60	SEED	Amino Acids and Derivatives	Arginine	urea cycle, polyamines	Arginine_and_Ornithine_Degradation	0.0492412	0.0378668	0.0230083	0.0240442	0.0137353	0.11169
61	SEED	Amino Acids and Derivatives	Arginine	urea cycle, polyamines	Polyamine_Metabolism	0.0492412	0.0378668	0.0230083	0.0240442	0.0137353	0.11169
62	SEED	Amino Acids and Derivatives	Alanine, serine, and glycine	Glycine_and_Serine_Utilization	L-serine dehydratase (EC 4.3.1.17)	0.0761001	0.0189334	0.0115042	0.0480885	0.0480736	0.0496401
63	SEED	Amino Acids and Derivatives	Arginine	urea cycle, polyamines	Polyamine_Metabolism	0.0492412	0.0252446	0.0517688	0.0120221	0.0686766	0.0372301
64	SEED	Amino Acids and Derivatives	Lysine, threonine, methionine, and cysteine.1	Threonine_degradation	Threonine dehydrogenase and related Zn-dependent dehydrogenases	0.0313353	0.0189334	0.0575209	0.0300553	0.0343383	0.0682552
65	SEED	Amino Acids and Derivatives	Lysine, threonine, methionine, and cysteine.1	Methionine_Degradation	Methionine transporter MetT	0.0447648	0.0252446	0.0402646	0.0300553	0.00686766	0.0868702
66	SEED	Amino Acids and Derivatives	Branched-chain amino acids	Leucine_Biosynthesis	3-isopropylmalate dehydratase small subunit (EC 4.2.1.33)	0.0268589	0.0189334	0.0402646	0.0540995	0.0686766	0.0248201
67	SEED	Amino Acids and Derivatives	Alanine, serine, and glycine	Glycine_Biosynthesis	2-amino-3-ketobutyrate coenzyme A ligase (EC 2.3.1.29)	0.0358118	0.0189334	0.0517688	0.0420774	0.0137353	0.0682552
68	SEED	Amino Acids and Derivatives	Histidine Metabolism	Histidine_Biosynthesis	ATP phosphoribosyltransferase regulatory subunit (EC 2.4.2.17)	0.0402883	0.113601	0.0345125	0.00601106	0.0137353	0.018615
69	SEED	Amino Acids and Derivatives	Lysine, threonine, methionine, and cysteine.1	Methionine_Biosynthesis	Homoserine O-succinyltransferase (EC 2.3.1.46)	0.0223824	0.0631114	0.0287604	0.0540995	0.020603	0.0372301
70	SEED	Amino Acids and Derivatives	Arginine	urea cycle, polyamines	Polyamine_Metabolism	0.0223824	0.044178	0.0287604	0.0420774	0.0343383	0.0496401
71	SEED	Amino Acids and Derivatives	Arginine	urea cycle, polyamines	Polyamine_Metabolism	0.0223824	0	0.0460167	0.0360664	0.041206	0.0744602
72	SEED	Amino Acids and Derivatives	Histidine Metabolism	Histidine_Biosynthesis	Imidazole glycerol phosphate synthase amidotransferase subunit (EC 2.4.2.-)	0.0313353	0.044178	0.0517688	0.0420774	0.0274706	0.01241
73	SEED	Amino Acids and Derivatives	Lysine, threonine, methionine, and cysteine.1	Lysine_Biosynthesis_DAP_Pathway	N-acetyl-L,L-diaminopimelate aminotransferase (EC 2.6.1.-)	0.0402883	0.0378668	0.0230083	0.0661217	0.0137353	0.018615
74	SEED	Amino Acids and Derivatives	Lysine, threonine, methionine, and cysteine.1	Threonine_degradation	L-threonine 3-dehydrogenase (EC 1.1.1.103)	0.0402883	0.00631114	0.0460167	0.0420774	0.020603	0.0434351
75	SEED	Amino Acids and Derivatives	Lysine, threonine, methionine, and cysteine.1	Methionine_Degradation	Adenosylhomocysteinase (EC 3.3.1.1)	0.0537177	0.0252446	0.0115042	0.0601106	0.0343383	0.01241
76	SEED	Amino Acids and Derivatives	Glutamine, glutamate, aspartate, asparagine	ammonia assimilation	Glutamine,_Glutamate,_Aspartate_and_Asparagine_Biosynthesis	0.0268589	0.0189334	0.0287604	0.0360664	0.041206	0.0434351
77	SEED	Amino Acids and Derivatives	Branched-chain amino acids	Leucine_Degradation_and_HMG-CoA_Metabolism	Dihydrolipoamide dehydrogenase (EC 1.8.1.4)	0.0358118	0.0126223	0.0230083	0.0420774	0.041206	0.0310251
78	SEED	Amino Acids and Derivatives	Arginine	urea cycle, polyamines	Arginine_Biosynthesis_extended	0.0223824	0.0252446	0.0287604	0.0240442	0.0480736	0.0372301
79	SEED	Amino Acids and Derivatives	Histidine Metabolism	Histidine_Biosynthesis	Phosphoribosylformimino-5-aminoimidazole carboxamide ribotide isomerase (EC 5.3.1.16)	0.0223824	0.0378668	0.0402646	0.0240442	0.041206	0.018615
80	SEED	Amino Acids and Derivatives	Aromatic amino acids and derivatives	Aromatic_amino_acid_degradation	Tryptophanase (EC 4.1.99.1)	0.0223824	0.0126223	0.00575209	0.0120221	0.0755443	0.0558451
81	SEED	Amino Acids and Derivatives	Arginine	urea cycle, polyamines	Arginine_Biosynthesis_extended	0.00895295	0.0126223	0.0402646	0	0.0343383	0.0868702
82	SEED	Amino Acids and Derivatives	Arginine	urea cycle, polyamines	Arginine_and_Ornithine_Degradation	0.0134294	0.0126223	0.0402646	0.0300553	0.041206	0.0434351
83	SEED	Amino Acids and Derivatives	Arginine	urea cycle, polyamines	Arginine_Biosynthesis_extended	0.0134294	0.0126223	0.0402646	0.0300553	0.041206	0.0434351
84	SEED	Amino Acids and Derivatives	Arginine	urea cycle, polyamines	Arginine_Deiminase_Pathway	0.0134294	0.0126223	0.0402646	0.0300553	0.041206	0.0434351
85	SEED	Amino Acids and Derivatives	Lysine, threonine, methionine, and cysteine.1	Lysine_Biosynthesis_DAP_Pathway	5-tetrahydropyridine-6-dicarboxylate N-acetyltransferase (EC 2.3.1.89)	0.0581942	0.0378668	0.00575209	0.0360664	0.0274706	0.01241
86	SEED	Amino Acids and Derivatives	Arginine	urea cycle, polyamines	Polyamine_Metabolism	0.0313353	0.0568003	0.0345125	0.0300553	0.0137353	0.00620501
87	SEED	Amino Acids and Derivatives	Lysine, threonine, methionine, and cysteine.1	Methionine_Salvage	Methylthioribose-1-phosphate isomerase (EC 5.3.1.23)	0.0761001	0.0315557	0.00575209	0.0240442	0.0137353	0.01241
88	SEED	Amino Acids and Derivatives	Aromatic amino acids and derivatives	Tryptophan_synthesis	Indole-3-glycerol phosphate synthase (EC 4.1.1.48)	0.0268589	0.00631114	0.0230083	0.0120221	0.0343383	0.0496401
89	SEED	Amino Acids and Derivatives	Lysine, threonine, methionine, and cysteine.1	Lysine_Biosynthesis_DAP_Pathway	N-acetyl-L,L-diaminopimelate deacetylase (EC 3.5.1.47)	0.0179059	0.0126223	0.0115042	0.0480885	0.041206	0.01241
90	SEED	Amino Acids and Derivatives	Arginine	urea cycle, polyamines	Arginine_and_Ornithine_Degradation	0.00895295	0.0252446	0.0172563	0.0360664	0.0343383	0.01241
91	SEED	Amino Acids and Derivatives	Arginine	urea cycle, polyamines	Arginine_Deiminase_Pathway	0.00895295	0.0252446	0.0172563	0.0360664	0.0343383	0.01241
92	SEED	Amino Acids and Derivatives	Arginine	urea cycle, polyamines	Polyamine_Metabolism	0.00895295	0.0252446	0.0172563	0.0360664	0.0343383	0.01241
93	SEED	Amino Acids and Derivatives	Lysine, threonine, methionine, and cysteine.1	Methionine_Degradation	Methionine ABC transporter permease protein	0.0358118	0.0252446	0.0230083	0.0240442	0.00686766	0.018615
94	SEED	Amino Acids and Derivatives	Branched-chain amino acids	Isoleucine_degradation	Acyl-CoA dehydrogenase, short-chain specific (EC 1.3.99.2)	0.0268589	0.0504891	0.0172563	0.0180332	0.0137353	0.00620501
95	SEED	Amino Acids and Derivatives	Histidine Metabolism	Histidine_Degradation	Imidazolonepropionase (EC 3.5.2.7)	0.0313353	0	0.0115042	0.0240442	0.0137353	0.0496401
96	SEED	Amino Acids and Derivatives	Alanine, serine, and glycine	Glycine_and_Serine_Utilization	L-serine dehydratase, alpha subunit (EC 4.3.1.17)	0.0179059	0.044178	0.0230083	0.0120221	0.020603	0.01241
97	SEED	Amino Acids and Derivatives	Aromatic amino acids and derivatives	Chorismate:_Intermediate_for_synthesis_of_PAPA_antibiotics,_PABA,_anthranilate,_3-hydroxyanthranilate_and_more.	Isochorismate synthase (EC 5.4.4.2)	0.00895295	0.0252446	0.00575209	0.0120221	0.0137353	0.0558451
98	SEED	Amino Acids and Derivatives	Aromatic amino acids and derivatives	Chorismate_Synthesis	3-dehydroquinate synthase (EC 4.2.3.4)	0.0223824	0.0189334	0.0172563	0	0.041206	0.018615
99	SEED	Amino Acids and Derivatives	Arginine	urea cycle, polyamines	Polyamine_Metabolism	0.0134294	0.0315557	0.0230083	0.0240442	0.0137353	0.01241
100	SEED	Amino Acids and Derivatives	Arginine	urea cycle, polyamines	Polyamine_Metabolism	0.00447648	0.00631114	0.0287604	0.0360664	0.00686766	0.0310251
101	SEED	Amino Acids and Derivatives	Arginine	urea cycle, polyamines	Urea_decomposition	0.00895295	0	0.0345125	0.0120221	0	0.0558451
102	SEED	Amino Acids and Derivatives	Lysine, threonine, methionine, and cysteine.1	Threonine_and_Homoserine_Biosynthesis	Homoserine kinase (EC 2.7.1.39)	0.0447648	0.0189334	0.0172563	0.0240442	0	0.00620501
103	SEED	Amino Acids and Derivatives	Lysine, threonine, methionine, and cysteine.1	Lysine_degradation	Lysine decarboxylase (EC 4.1.1.18)	0.0179059	0.0315557	0.0230083	0.0120221	0.0137353	0.01241
104	SEED	Amino Acids and Derivatives	Aromatic amino acids and derivatives	Aromatic_amino_acid_interconversions_with_aryl_acids	Indolepyruvate oxidoreductase subunit IorB (EC 1.2.7.8)	0.0134294	0.0315557	0.0172563	0.00601106	0.0343383	0.00620501
105	SEED	Amino Acids and Derivatives	Histidine Metabolism	Histidine_Biosynthesis	ATP phosphoribosyltransferase catalytic subunit (EC 2.4.2.17)	0.0179059	0.0315557	0.00575209	0.0180332	0.0343383	0
106	SEED	Amino Acids and Derivatives	Lysine, threonine, methionine, and cysteine.1	Lysine_degradation	Lysine 3-aminomutase (EC 5.4.3.2)	0.0313353	0.0189334	0.0115042	0.00601106	0.020603	0.018615
107	SEED	Amino Acids and Derivatives	Histidine Metabolism	Histidine_Biosynthesis	ATP phosphoribosyltransferase (EC 2.4.2.17)	0.0134294	0.0126223	0.0287604	0.00601106	0.020603	0.018615
108	SEED	Amino Acids and Derivatives	Lysine, threonine, methionine, and cysteine.1	Methionine_Biosynthesis	Duplicated ATPase component MtsB of energizing module of methionine-regulated ECF transporter	0.0134294	0.0315557	0.00575209	0.0360664	0.00686766	0
109	SEED	Amino Acids and Derivatives	Histidine Metabolism	Histidine_Degradation	Glutamate formiminotransferase (EC 2.1.2.5)	0.0223824	0.0126223	0	0.0180332	0.0343383	0.00620501
110	SEED	Amino Acids and Derivatives	Aromatic amino acids and derivatives	Phenylalanine_and_Tyrosine_Branches_from_Chorismate	Chorismate mutase (EC 5.4.99.5)	0.0179059	0.0252446	0.0172563	0.00601106	0	0.0248201
111	SEED	Amino Acids and Derivatives	Alanine, serine, and glycine	Glycine_and_Serine_Utilization	D-serine dehydratase (EC 4.3.1.18)	0.00895295	0.00631114	0.0345125	0.0120221	0.020603	0.00620501
112	SEED	Amino Acids and Derivatives	Arginine	urea cycle, polyamines	Arginine_and_Ornithine_Degradation	0.0447648	0	0.0172563	0.0180332	0	0.00620501
113	SEED	Amino Acids and Derivatives	Arginine	urea cycle, polyamines	Urea_decomposition	0.00447648	0.0126223	0.0460167	0	0.0137353	0.00620501
114	SEED	Amino Acids and Derivatives	Branched-chain amino acids	Ketoisovalerate_oxidoreductase	Transcriptional regulator, Hth-3 family	0.0134294	0.0315557	0	0.0180332	0.0137353	0.00620501
115	SEED	Amino Acids and Derivatives	Arginine	urea cycle, polyamines	Polyamine_Metabolism	0.0179059	0.0189334	0.00575209	0.0300553	0.00686766	0
116	SEED	Amino Acids and Derivatives	Arginine	urea cycle, polyamines	Arginine_and_Ornithine_Degradation	0.0134294	0.0189334	0.0115042	0.0120221	0.00686766	0.01241
117	SEED	Amino Acids and Derivatives	Alanine, serine, and glycine	Glycine_and_Serine_Utilization	L-serine dehydratase, beta subunit (EC 4.3.1.17)	0.0313353	0	0.0230083	0.00601106	0.0137353	0
118	SEED	Amino Acids and Derivatives	Alanine, serine, and glycine	Alanine_biosynthesis	Cysteine desulfurase (EC 2.8.1.7), SufS subfamily	0	0	0.0230083	0.00601106	0.00686766	0.0372301
119	SEED	Amino Acids and Derivatives	Lysine, threonine, methionine, and cysteine.1	Methionine_Biosynthesis	Homoserine O-acetyltransferase (EC 2.3.1.31)	0.00895295	0	0.0115042	0.0240442	0.020603	0.00620501
120	SEED	Amino Acids and Derivatives	Branched-chain amino acids	Ketoisovalerate_oxidoreductase	Ketoisovalerate oxidoreductase subunit VorB (EC 1.2.7.7)	0.0179059	0.0126223	0.00575209	0	0.0274706	0.00620501
121	SEED	Amino Acids and Derivatives	Alanine, serine, and glycine	Alanine_biosynthesis	Probable valine-pyruvate aminotransferase (EC 2.6.1.66)	0.0134294	0.0189334	0.00575209	0	0.00686766	0.0248201
122	SEED	Amino Acids and Derivatives	Lysine, threonine, methionine, and cysteine.1	Methionine_Degradation	Methionine gamma-lyase (EC 4.4.1.11)	0.0134294	0.0126223	0.0172563	0.00601106	0.00686766	0.01241
123	SEED	Amino Acids and Derivatives	Glutamine, glutamate, aspartate, asparagine	ammonia assimilation	Glutamine,_Glutamate,_Aspartate_and_Asparagine_Biosynthesis	0.0134294	0	0.0115042	0.0300553	0.00686766	0.00620501
124	SEED	Amino Acids and Derivatives	Aromatic amino acids and derivatives	Aromatic_amino_acid_interconversions_with_aryl_acids	Amino acid-binding ACT	0.0179059	0.0126223	0	0.0300553	0	0.00620501
125	SEED	Amino Acids and Derivatives	Lysine, threonine, methionine, and cysteine.1	Cysteine_Biosynthesis	Sulfate adenylyltransferase subunit 1 (EC 2.7.7.4)	0.0402883	0	0	0	0.00686766	0.018615
126	SEED	Amino Acids and Derivatives	Arginine	urea cycle, polyamines	Polyamine_Metabolism	0.0134294	0.0189334	0	0.0120221	0.0137353	0.00620501
127	SEED	Amino Acids and Derivatives	Lysine, threonine, methionine, and cysteine.1	Methionine_Biosynthesis	Cystathionine gamma-synthase (EC 2.5.1.48)	0.0134294	0.0189334	0.00575209	0.0120221	0.0137353	0
128	SEED	Amino Acids and Derivatives	Branched-chain amino acids	Ketoisovalerate_oxidoreductase	Ketoisovalerate oxidoreductase subunit VorA (EC 1.2.7.7)	0.0134294	0.00631114	0.00575209	0.0300553	0.00686766	0
129	SEED	Carbohydrates	Di- and oligosaccharides	Lactose_utilization	Beta-galactosidase (EC 3.2.1.23)	0.85053	0.858315	0.621225	1.17817	1.03015	0.800447
130	SEED	Carbohydrates	Di- and oligosaccharides	Beta-Glucoside_Metabolism	Beta-glucosidase (EC 3.2.1.21)	0.434218	0.473335	0.465919	0.498918	0.590619	0.397121
131	SEED	Carbohydrates	Central carbohydrate metabolism	Pyruvate:ferredoxin_oxidoreductase	Pyruvate-flavodoxin oxidoreductase (EC 1.2.7.-)	0.290971	0.321868	0.580961	0.28252	0.32278	0.372301
132	SEED	Carbohydrates	Aminosugars	Chitin_and_N-acetylglucosamine_utilization	Beta-hexosaminidase (EC 3.2.1.52)	0.295447	0.284001	0.178315	0.408752	0.425795	0.167535
133	SEED	Carbohydrates	Polysaccharides	Glycogen_metabolism	Glycogen phosphorylase (EC 2.4.1.1)	0.362595	0.27769	0.304861	0.22842	0.240368	0.285431
134	SEED	Carbohydrates	Di- and oligosaccharides	Trehalose_Biosynthesis	4-alpha-glucan (glycogen) branching enzyme, GH-13-type (EC 2.4.1.18)	0.219347	0.252446	0.281852	0.216398	0.240368	0.192355
135	SEED	Carbohydrates	Di- and oligosaccharides	Maltose_and_Maltodextrin_Utilization	Maltodextrin glucosidase (EC 3.2.1.20)	0.250683	0.189334	0.230083	0.174321	0.357118	0.18615
136	SEED	Carbohydrates	Polysaccharides	Glycogen_metabolism	4-alpha-glucanotransferase (amylomaltase) (EC 2.4.1.25)	0.143247	0.246134	0.258844	0.22842	0.20603	0.217175
137	SEED	Carbohydrates	Di- and oligosaccharides	Maltose_and_Maltodextrin_Utilization	Neopullulanase (EC 3.2.1.135)	0.170106	0.233512	0.24734	0.192354	0.151089	0.241996
138	SEED	Carbohydrates	Di- and oligosaccharides	Maltose_and_Maltodextrin_Utilization	Alpha-glucosidase (EC 3.2.1.20)	0.174583	0.0694225	0.327869	0.126232	0.267839	0.248201
139	SEED	Carbohydrates	Di- and oligosaccharides	Trehalose_Biosynthesis	Alpha-amylase (EC 3.2.1.1)	0.125341	0.100978	0.293356	0.16831	0.199162	0.285431
140	SEED	Carbohydrates	Glycoside hydrolases	Predicted_carbohydrate_hydrolases	Polysaccharide deacetylase	0.2283	0.157778	0.178315	0.174321	0.2335	0.14892
141	SEED	Carbohydrates	Monosaccharides	Xylose_utilization	Endo-4-beta-xylanase A precursor (EC 3.2.1.8)	0.192488	0.145156	0.103538	0.222409	0.226633	0.22338
142	SEED	Carbohydrates	Monosaccharides	Mannose_Metabolism	Alpha-2-mannosidase	0.205918	0.107289	0.0920334	0.252465	0.164824	0.273021
143	SEED	Carbohydrates	Fermentation	Acetoin,_butanediol_metabolism	Acetolactate synthase large subunit (EC 2.2.1.6)	0.232777	0.157778	0.224331	0.132243	0.103015	0.204765
144	SEED	Carbohydrates	Organic acids	Propionyl-CoA_to_Succinyl-CoA_Module	Methylmalonyl-CoA mutase (EC 5.4.99.2)	0.094006	0.145156	0.184067	0.132243	0.254103	0.217175
145	SEED	Carbohydrates	Central carbohydrate metabolism	Entner-Doudoroff_Pathway	Phosphoglycerate kinase (EC 2.7.2.3)	0.107435	0.107289	0.132298	0.16831	0.199162	0.273021
146	SEED	Carbohydrates	One-carbon Metabolism	Serine-glyoxylate_cycle	Phosphoglyceromutase	0.1522	0.151467	0.212827	0.138254	0.164824	0.167535
147	SEED	Carbohydrates	Fermentation	Butanol_Biosynthesis	Pyruvate formate-lyase (EC 2.3.1.54)	0.161153	0.145156	0.212827	0.192354	0.171692	0.0682552
148	SEED	Carbohydrates	Monosaccharides	L-Arabinose_utilization	Alpha-N-arabinofuranosidase (EC 3.2.1.55)	0.111912	0.189334	0.161058	0.174321	0.0892796	0.22338
149	SEED	Carbohydrates	Monosaccharides	L-fucose_utilization	Alpha-L-fucosidase (EC 3.2.1.51)	0.1522	0.151467	0.10929	0.192354	0.219765	0.105485
150	SEED	Carbohydrates	Monosaccharides	Xylose_utilization	Alpha-xylosidase (EC 3.2.1.-)	0.138771	0.208268	0.0805292	0.198365	0.164824	0.117895
151	SEED	Carbohydrates	Monosaccharides	D-Tagatose_and_Galactitol_Utilization	6-phosphofructokinase (EC 2.7.1.11)	0.143247	0.113601	0.16681	0.16831	0.109883	0.17374
152	SEED	Carbohydrates	CO2 fixation	Photorespiration_(oxidative_C2_cycle)	Phosphoglycolate phosphatase (EC 3.1.3.18)	0.179059	0.170401	0.155306	0.0901659	0.123618	0.14892
153	SEED	Carbohydrates	Central carbohydrate metabolism	Pyruvate_metabolism_I:_anaplerotic_reactions,_PEP	Phosphoenolpyruvate carboxykinase [ATP] (EC 4.1.1.49)	0.134294	0.0757337	0.16681	0.132243	0.171692	0.142715
154	SEED	Carbohydrates	Monosaccharides	Xylose_utilization	Beta-xylosidase (EC 3.2.1.37)	0.143247	0.151467	0.0747771	0.186343	0.151089	0.11169
155	SEED	Carbohydrates	Di- and oligosaccharides	Fructooligosaccharides(FOS)_and_Raffinose_Utilization	Multiple sugar ABC transporter, membrane-spanning permease protein MsmF	0.179059	0.189334	0.126546	0.150277	0.0686766	0.0806652
156	SEED	Carbohydrates	Central carbohydrate metabolism	Glycolysis_and_Gluconeogenesis,_including_Archaeal_enzymes	Glucose-6-phosphate isomerase (EC 5.3.1.9)	0.237253	0.145156	0.0920334	0.120221	0.130486	0.0620501
157	SEED	Carbohydrates	Sugar alcohols	Ethanolamine_utilization	Acetate kinase (EC 2.7.2.1)	0.102959	0.0946671	0.149554	0.096177	0.151089	0.16133
158	SEED	Carbohydrates	Di- and oligosaccharides	Maltose_and_Maltodextrin_Utilization	Periplasmic alpha-amylase (EC 3.2.1.1)	0.0671471	0.0252446	0.345125	0.0120221	0.103015	0.179945
159	SEED	Carbohydrates	Di- and oligosaccharides	Fructooligosaccharides(FOS)_and_Raffinose_Utilization	Multiple sugar ABC transporter, membrane-spanning permease protein MsmG	0.16563	0.145156	0.13805	0.132243	0.0892796	0.0558451
160	SEED	Carbohydrates	Central carbohydrate metabolism	Entner-Doudoroff_Pathway	Glucokinase (EC 2.7.1.2)	0.138771	0.0883559	0.10929	0.16831	0.0824119	0.13651
161	SEED	Carbohydrates	Central carbohydrate metabolism	Entner-Doudoroff_Pathway	Enolase (EC 4.2.1.11)	0.147724	0.113601	0.0805292	0.102188	0.109883	0.16133
162	SEED	Carbohydrates	Di- and oligosaccharides	Sucrose_utilization	Sucrose-6-phosphate hydrolase (EC 3.2.1.26)	0.094006	0.132534	0.0862813	0.0901659	0.137353	0.155125
163	SEED	Carbohydrates	Central carbohydrate metabolism	Pentose_phosphate_pathway	Ribose-phosphate pyrophosphokinase (EC 2.7.6.1)	0.125341	0.119912	0.13805	0.120221	0.123618	0.0682552
164	SEED	Carbohydrates	Di- and oligosaccharides	Maltose_and_Maltodextrin_Utilization	Aldose 1-epimerase (EC 5.1.3.3)	0.116388	0.100978	0.149554	0.0540995	0.130486	0.13651
165	SEED	Carbohydrates	Central carbohydrate metabolism	Pyruvate_Alanine_Serine_Interconversions	Alanine racemase (EC 5.1.1.1)	0.156677	0.100978	0.103538	0.120221	0.137353	0.0434351
166	SEED	Carbohydrates	Di- and oligosaccharides	Maltose_and_Maltodextrin_Utilization	Multiple sugar ABC transporter, ATP-binding protein	0.094006	0.22089	0.0632729	0.126232	0.0549413	0.0806652
167	SEED	Carbohydrates	CO2 fixation	Calvin-Benson_cycle	Fructose-bisphosphate aldolase class II (EC 4.1.2.13)	0.0626707	0.0820448	0.0747771	0.150277	0.157956	0.0992802
168	SEED	Carbohydrates	Monosaccharides	D-ribose_utilization	Ribose ABC transport system, permease protein RbsC (TC 3.A.1.2.1)	0.1522	0.132534	0.069025	0.096177	0.0549413	0.11169
169	SEED	Carbohydrates	CO2 fixation	Carboxysome	NADH dehydrogenase (EC 1.6.99.3)	0.111912	0.0883559	0.10929	0.11421	0.151089	0.0372301
170	SEED	Carbohydrates	Central carbohydrate metabolism	Pentose_phosphate_pathway	Transketolase (EC 2.2.1.1)	0.0626707	0.0820448	0.069025	0.0721327	0.185427	0.13651
171	SEED	Carbohydrates	Central carbohydrate metabolism	Pyruvate_metabolism_I:_anaplerotic_reactions,_PEP	Oxaloacetate decarboxylase alpha chain (EC 4.1.1.3)	0.0984825	0.100978	0.120794	0.096177	0.0961472	0.0868702
172	SEED	Carbohydrates	Central carbohydrate metabolism	Pyruvate_metabolism_I:_anaplerotic_reactions,_PEP	Pyruvate kinase (EC 2.7.1.40)	0.107435	0.0946671	0.126546	0.108199	0.0892796	0.0682552
173	SEED	Carbohydrates	CO2 fixation	Calvin-Benson_cycle	Fructose-6-bisphosphatase, Bacillus type (EC 3.1.3.11)	0.125341	0.0883559	0.0517688	0.0901659	0.144221	0.0930752
174	SEED	Carbohydrates	Central carbohydrate metabolism	Pyruvate_metabolism_II:_acetyl-CoA,_acetogenesis_from_pyruvate	Acetyl-coenzyme A synthetase (EC 6.2.1.1)	0.0984825	0.0189334	0.10929	0.0601106	0.151089	0.14892
175	SEED	Carbohydrates	Monosaccharides	D-Galacturonate_and_D-Glucuronate_Utilization	2-dehydro-3-deoxygluconate kinase (EC 2.7.1.45)	0.0492412	0.119912	0.069025	0.108199	0.157956	0.0806652
176	SEED	Carbohydrates	Central carbohydrate metabolism	Entner-Doudoroff_Pathway	NAD-dependent glyceraldehyde-3-phosphate dehydrogenase (EC 1.2.1.12)	0.0984825	0.0757337	0.13805	0.11421	0.0549413	0.0930752
177	SEED	Carbohydrates	One-carbon Metabolism	One-carbon_metabolism_by_tetrahydropterines	Formate--tetrahydrofolate ligase (EC 6.3.4.3)	0.0761001	0.0883559	0.13805	0.0781438	0.0755443	0.117895
178	SEED	Carbohydrates	Sugar alcohols	Ribitol,_Xylitol,_Arabitol,_Mannitol_and_Sorbitol_utilization	Fructokinase (EC 2.7.1.4)	0.0761001	0.0883559	0.189819	0.0540995	0.041206	0.0992802
179	SEED	Carbohydrates	One-carbon Metabolism	Serine-glyoxylate_cycle	Citrate synthase (si) (EC 2.3.3.1)	0.107435	0.100978	0.0805292	0.0901659	0.0686766	0.0992802
180	SEED	Carbohydrates	Organic acids	Propionyl-CoA_to_Succinyl-CoA_Module	Methylmalonyl-CoA decarboxylase, alpha chain (EC 4.1.1.41)	0.1522	0.0694225	0.0517688	0.0661217	0.0961472	0.105485
181	SEED	Carbohydrates	Monosaccharides	Mannose_Metabolism	Mannose-1-phosphate guanylyltransferase (GDP) (EC 2.7.7.22)	0.125341	0.044178	0.0575209	0.0781438	0.123618	0.11169
182	SEED	Carbohydrates	Polysaccharides	Glycogen_metabolism	Putative glycogen debranching enzyme, archaeal type, TIGR01561	0.0492412	0.0504891	0.0920334	0.138254	0.0755443	0.130305
183	SEED	Carbohydrates	Monosaccharides	L-Arabinose_utilization	Ribulokinase (EC 2.7.1.16)	0.0984825	0.0946671	0.0920334	0.144265	0.0824119	0.018615
184	SEED	Carbohydrates	Fermentation	Butanol_Biosynthesis	NADH-dependent butanol dehydrogenase A (EC 1.1.1.-)	0.0492412	0.0568003	0.13805	0.0540995	0.103015	0.11169
185	SEED	Carbohydrates	Central carbohydrate metabolism	Pentose_phosphate_pathway	Transketolase, C-terminal section (EC 2.2.1.1)	0.138771	0.100978	0.0517688	0.0781438	0.0824119	0.0558451
186	SEED	Carbohydrates	Monosaccharides	Xylose_utilization	Xylulose kinase (EC 2.7.1.17)	0.094006	0.107289	0.0460167	0.120221	0.0961472	0.0434351
187	SEED	Carbohydrates	Central carbohydrate metabolism	Glycolysis_and_Gluconeogenesis	Pyrophosphate--fructose 6-phosphate 1-phosphotransferase, beta subunit (EC 2.7.1.90)	0.0537177	0.0504891	0.120794	0.0360664	0.123618	0.11169
188	SEED	Carbohydrates	Monosaccharides	Deoxyribose_and_Deoxynucleoside_Catabolism	Deoxyribose-phosphate aldolase (EC 4.1.2.4)	0.0671471	0.0757337	0.0402646	0.102188	0.11675	0.0868702
189	SEED	Carbohydrates	Di- and oligosaccharides	Beta-Glucoside_Metabolism	Periplasmic beta-glucosidase (EC 3.2.1.21)	0.0313353	0.044178	0.0805292	0.0781438	0.109883	0.142715
190	SEED	Carbohydrates	Di- and oligosaccharides	Trehalose_Biosynthesis	Glycogen debranching enzyme (EC 3.2.1.-)	0.0805766	0.113601	0.0632729	0.0240442	0.0686766	0.13651
191	SEED	Carbohydrates	Di- and oligosaccharides	Lactose_utilization	Galactoside O-acetyltransferase (EC 2.3.1.18)	0.0761001	0.100978	0.0460167	0.0841548	0.123618	0.0434351
192	SEED	Carbohydrates	Di- and oligosaccharides	Lactose_and_Galactose_Uptake_and_Utilization	Galactokinase (EC 2.7.1.6)	0.0671471	0.0757337	0.0977854	0.0841548	0.0549413	0.0930752
193	SEED	Carbohydrates	Monosaccharides	Mannose_Metabolism	Phosphomannomutase (EC 5.4.2.8)	0.094006	0.100978	0.10929	0.0841548	0.0549413	0.0248201
194	SEED	Carbohydrates	Central carbohydrate metabolism	Pentose_phosphate_pathway	Transketolase, N-terminal section (EC 2.2.1.1)	0.143247	0.044178	0.0862813	0.0420774	0.0343383	0.117895
195	SEED	Carbohydrates	Polysaccharides	Glycogen_metabolism	Glycogen synthase, ADP-glucose transglucosylase (EC 2.4.1.21)	0.116388	0.0883559	0.069025	0.0841548	0.0549413	0.0496401
196	SEED	Carbohydrates	Di- and oligosaccharides	Fructooligosaccharides(FOS)_and_Raffinose_Utilization	Two-component sensor kinase YesM (EC 2.7.3.-)	0.0761001	0.113601	0.0575209	0.11421	0.0480736	0.0496401
197	SEED	Carbohydrates	Monosaccharides	L-fucose_utilization	Fucose permease	0.0671471	0.0946671	0.0460167	0.132243	0.0892796	0.018615
198	SEED	Carbohydrates	Aminosugars	Chitin_and_N-acetylglucosamine_utilization	Glucosamine-6-phosphate deaminase (EC 3.5.99.6)	0.0537177	0.0504891	0.0517688	0.126232	0.103015	0.0620501
199	SEED	Carbohydrates	Polysaccharides	Glycogen_metabolism	Glucose-1-phosphate adenylyltransferase (EC 2.7.7.27)	0.0716236	0.113601	0.0805292	0.0841548	0.0343383	0.0496401
200	SEED	Carbohydrates	Aminosugars	Chitin_and_N-acetylglucosamine_utilization	N-Acetyl-D-glucosamine ABC transport system, sugar-binding protein	0.0805766	0.138845	0.0172563	0.0781438	0.0892796	0.0248201
201	SEED	Carbohydrates	Fermentation	Acetyl-CoA_fermentation_to_Butyrate	Electron transfer flavoprotein, alpha subunit	0.102959	0.0568003	0.0805292	0.0601106	0.041206	0.0868702
202	SEED	Carbohydrates	Di- and oligosaccharides	Fructooligosaccharides(FOS)_and_Raffinose_Utilization	Multiple sugar ABC transporter, substrate-binding protein	0.107435	0.107289	0.0287604	0.0781438	0.0618089	0.0434351
203	SEED	Carbohydrates	Sugar alcohols	Ethanolamine_utilization	Phosphate acetyltransferase (EC 2.3.1.8)	0.116388	0.107289	0.0575209	0.0360664	0.0755443	0.0310251
204	SEED	Carbohydrates	Monosaccharides	D-ribose_utilization	Ribokinase (EC 2.7.1.15)	0.0671471	0.0757337	0.069025	0.0901659	0.0686766	0.0372301
205	SEED	Carbohydrates	One-carbon Metabolism	One-carbon_metabolism_by_tetrahydropterines	10-methylenetetrahydrofolate reductase (EC 1.5.1.20)	0.0671471	0.0378668	0.10929	0.0721327	0.0549413	0.0620501
206	SEED	Carbohydrates	Aminosugars	Chitin_and_N-acetylglucosamine_utilization	N-Acetyl-D-glucosamine ABC transport system, permease protein 1	0.085053	0.0315557	0.115042	0.102188	0.0274706	0.0372301
207	SEED	Carbohydrates	One-carbon Metabolism	Serine-glyoxylate_cycle	Aconitate hydratase (EC 4.2.1.3)	0.0402883	0.0252446	0.0977854	0.11421	0.0274706	0.0930752
208	SEED	Carbohydrates	Central carbohydrate metabolism	Pyruvate_metabolism_I:_anaplerotic_reactions,_PEP	NAD-dependent malic enzyme (EC 1.1.1.38)	0.0716236	0.0252446	0.069025	0.11421	0.0618089	0.0496401
209	SEED	Carbohydrates	Monosaccharides	D-ribose_utilization	Ribose ABC transport system, ATP-binding protein RbsA (TC 3.A.1.2.1)	0.0581942	0.0757337	0.0805292	0.0901659	0.0549413	0.0310251
210	SEED	Carbohydrates	Sugar alcohols	Inositol_catabolism	Myo-inositol 2-dehydrogenase (EC 1.1.1.18)	0.0402883	0.107289	0.0632729	0.0781438	0.0549413	0.0434351
211	SEED	Carbohydrates	Fermentation	Butanol_Biosynthesis	Alcohol dehydrogenase (EC 1.1.1.1)	0.0447648	0.0504891	0.0920334	0.0721327	0.0274706	0.0992802
212	SEED	Carbohydrates	Di- and oligosaccharides	Lactose_and_Galactose_Uptake_and_Utilization	Galactose-1-phosphate uridylyltransferase (EC 2.7.7.10)	0.0402883	0.100978	0.0920334	0.0661217	0.0274706	0.0558451
213	SEED	Carbohydrates	Central carbohydrate metabolism	Pyruvate_metabolism_I:_anaplerotic_reactions,_PEP	NADP-dependent malic enzyme (EC 1.1.1.40)	0.0313353	0.0568003	0.069025	0.0420774	0.0961472	0.0868702
214	SEED	Carbohydrates	Di- and oligosaccharides	Lactose_and_Galactose_Uptake_and_Utilization	Galactose/methyl galactoside ABC transport system, ATP-binding protein MglA (EC 3.6.3.17)	0.0895295	0.0757337	0.0632729	0.0781438	0.0549413	0.018615
215	SEED	Carbohydrates	Di- and oligosaccharides	Fructooligosaccharides(FOS)_and_Raffinose_Utilization	Alpha-mannosidase (EC 3.2.1.24)	0.0358118	0.0568003	0.0517688	0.0901659	0.0824119	0.0620501
216	SEED	Carbohydrates	Monosaccharides	L-Arabinose_utilization	L-arabinose isomerase (EC 5.3.1.4)	0.0581942	0.044178	0.0575209	0.0661217	0.0961472	0.0558451
217	SEED	Carbohydrates	Central carbohydrate metabolism	Pyruvate_metabolism_I:_anaplerotic_reactions,_PEP	Pyruvate,phosphate dikinase (EC 2.7.9.1)	0.085053	0.0378668	0.0402646	0.0781438	0.0824119	0.0434351
218	SEED	Carbohydrates	Monosaccharides	Mannose_Metabolism	Mannose-6-phosphate isomerase (EC 5.3.1.8)	0.0984825	0.0631114	0.0632729	0.0360664	0.0480736	0.0558451
219	SEED	Carbohydrates	Sugar alcohols	Glycerol_and_Glycerol-3-phosphate_Uptake_and_Utilization	Glycerophosphoryl diester phosphodiesterase (EC 3.1.4.46)	0.0402883	0.157778	0.0517688	0.0360664	0.0549413	0.018615
220	SEED	Carbohydrates	Di- and oligosaccharides	Beta-Glucoside_Metabolism	6-phospho-beta-glucosidase (EC 3.2.1.86)	0.0581942	0.0757337	0.0460167	0.120221	0.0480736	0.00620501
221	SEED	Carbohydrates	Monosaccharides	Hexose_Phosphate_Uptake_System	Predicted glucose transporter in maltodextrin utilization gene cluster	0.0268589	0.0568003	0.10929	0.0300553	0.0137353	0.11169
222	SEED	Carbohydrates	Aminosugars	Chitin_and_N-acetylglucosamine_utilization	N-Acetyl-D-glucosamine ABC transport system, permease protein 2	0.0581942	0.0694225	0.0517688	0.108199	0.0480736	0.00620501
223	SEED	Carbohydrates	Polysaccharides	Glycogen_metabolism	Glycogen biosynthesis protein GlgD, glucose-1-phosphate adenylyltransferase family	0.0268589	0.100978	0.0977854	0.0781438	0.00686766	0.0310251
224	SEED	Carbohydrates	Monosaccharides	D-ribose_utilization	Ribose operon repressor	0.085053	0.0568003	0.0517688	0.0661217	0.0686766	0.01241
225	SEED	Carbohydrates	Fermentation	Fermentations:_Mixed_acid	Pyruvate formate-lyase activating enzyme (EC 1.97.1.4)	0.0492412	0.0568003	0.0460167	0.096177	0.0549413	0.0372301
226	SEED	Carbohydrates	Monosaccharides	L-rhamnose_utilization	Alfa-L-rhamnosidase (EC 3.2.1.40)	0.0402883	0.0568003	0.069025	0.0240442	0.11675	0.0310251
227	SEED	Carbohydrates	CO2 fixation	Photorespiration_(oxidative_C2_cycle)	Aminomethyltransferase (glycine cleavage system T protein) (EC 2.1.2.10)	0.0358118	0.0252446	0.0977854	0.0300553	0.0824119	0.0620501
228	SEED	Carbohydrates	Di- and oligosaccharides	Sucrose_utilization	Sucrose phosphorylase (EC 2.4.1.7)	0.0402883	0.044178	0.069025	0.0240442	0.0686766	0.0868702
229	SEED	Carbohydrates	Central carbohydrate metabolism	Pentose_phosphate_pathway	Ribulose-phosphate 3-epimerase (EC 5.1.3.1)	0.0537177	0.0568003	0.0402646	0.0300553	0.0755443	0.0744602
230	SEED	Carbohydrates	Central carbohydrate metabolism	TCA_Cycle	Isocitrate dehydrogenase [NADP] (EC 1.1.1.42)	0.0581942	0.0378668	0.0402646	0.0781438	0.041206	0.0744602
231	SEED	Carbohydrates	Fermentation	Fermentations:_Lactate	L-lactate dehydrogenase (EC 1.1.1.27)	0.0447648	0.0694225	0.0517688	0.0360664	0.103015	0.0248201
232	SEED	Carbohydrates	Sugar alcohols	Ribitol,_Xylitol,_Arabitol,_Mannitol_and_Sorbitol_utilization	Transcriptional regulator of various polyols utilization, AraC family	0.0358118	0.0504891	0.0862813	0.0480885	0.041206	0.0620501
233	SEED	Carbohydrates	Aminosugars	Chitin_and_N-acetylglucosamine_utilization	N-acetylglucosamine-6-phosphate deacetylase (EC 3.5.1.25)	0.0179059	0.0568003	0.069025	0.0601106	0.0755443	0.0434351
234	SEED	Carbohydrates	Glycoside hydrolases	Predicted_carbohydrate_hydrolases	COG1649 predicted glycoside hydrolase	0.0492412	0.0568003	0.0575209	0.0240442	0.0274706	0.105485
235	SEED	Carbohydrates	Monosaccharides	Xylose_utilization	Predicted beta-xyloside ABC transporter, permease component	0.0537177	0.0946671	0.0345125	0.0781438	0.0343383	0.0248201
236	SEED	Carbohydrates	Di- and oligosaccharides	Maltose_and_Maltodextrin_Utilization	Maltose/maltodextrin ABC transporter, permease protein MalG	0.0223824	0.0694225	0.0920334	0.0480885	0.0480736	0.0372301
237	SEED	Carbohydrates	Monosaccharides	Xylose_utilization	Possible alpha-xyloside ABC transporter, permease component	0.094006	0.0504891	0.0345125	0.0781438	0.0343383	0.0248201
238	SEED	Carbohydrates	Monosaccharides	L-ascorbate_utilization_(and_related_gene_clusters)	L-ribulose-5-phosphate 4-epimerase (EC 5.1.3.4)	0.0671471	0.0694225	0.0517688	0.0480885	0.0549413	0.0248201
239	SEED	Carbohydrates	Central carbohydrate metabolism	Pyruvate_metabolism_I:_anaplerotic_reactions,_PEP	Oxaloacetate decarboxylase beta chain (EC 4.1.1.3)	0.0761001	0.0189334	0.0862813	0.0540995	0.0480736	0.0310251
240	SEED	Carbohydrates	Monosaccharides	Mannose_Metabolism	Beta-mannosidase (EC 3.2.1.25)	0.0626707	0.044178	0.0230083	0.0721327	0.0755443	0.0310251
241	SEED	Carbohydrates	Central carbohydrate metabolism	Pyruvate_metabolism_II:_acetyl-CoA,_acetogenesis_from_pyruvate	Aldehyde dehydrogenase (EC 1.2.1.3)	0.0537177	0.0568003	0.0632729	0.0601106	0.0549413	0.018615
242	SEED	Carbohydrates	Monosaccharides	Deoxyribose_and_Deoxynucleoside_Catabolism	Putative deoxyribose-specific ABC transporter, ATP-binding protein	0.0671471	0.0252446	0.0287604	0.0420774	0.137353	0.00620501
243	SEED	Carbohydrates	One-carbon Metabolism	Serine-glyoxylate_cycle	Malate dehydrogenase (EC 1.1.1.37)	0.0761001	0.0315557	0.0460167	0.0661217	0.0343383	0.0496401
244	SEED	Carbohydrates	Fermentation	Acetyl-CoA_fermentation_to_Butyrate	Electron transfer flavoprotein, beta subunit	0.0358118	0.0631114	0.0575209	0.0540995	0.0480736	0.0434351
245	SEED	Carbohydrates	One-carbon Metabolism	Serine-glyoxylate_cycle	Fumarate hydratase class I, aerobic (EC 4.2.1.2)	0.0581942	0.0378668	0.0517688	0.0360664	0.0618089	0.0558451
246	SEED	Carbohydrates	Central carbohydrate metabolism	Pentose_phosphate_pathway	Ribose 5-phosphate isomerase B (EC 5.3.1.6)	0.0358118	0.0378668	0.0632729	0.0360664	0.0343383	0.0930752
247	SEED	Carbohydrates	Glycoside hydrolases	Predicted_carbohydrate_hydrolases	COG2152 predicted glycoside hydrolase	0.0671471	0.0631114	0.0345125	0.0420774	0.0618089	0.0310251
248	SEED	Carbohydrates	Monosaccharides	D-Galacturonate_and_D-Glucuronate_Utilization	D-mannonate oxidoreductase (EC 1.1.1.57)	0.0402883	0.0820448	0.0575209	0.0721327	0.0343383	0.01241
249	SEED	Carbohydrates	Lacto-N-Biose_I_and_Galacto-N-Biose_Metabolic_Pathway	N-acetylhexosamine 1-kinase	N-acetylhexosamine 1-kinase	0.0581942	0.0252446	0.0632729	0.0901659	0.0480736	0.01241
250	SEED	Carbohydrates	Fermentation	Acetoin,_butanediol_metabolism	Acetolactate synthase small subunit (EC 2.2.1.6)	0.0537177	0.0568003	0.0402646	0.0781438	0.020603	0.0434351
251	SEED	Carbohydrates	Aminosugars	Chitin_and_N-acetylglucosamine_utilization	Alpha-N-acetylglucosaminidase (EC 3.2.1.50)	0.0223824	0.0252446	0.0345125	0.102188	0.0892796	0.018615
252	SEED	Carbohydrates	Polysaccharides	Glycogen_metabolism	Maltodextrin phosphorylase (EC 2.4.1.1)	0.0671471	0.0504891	0.0747771	0.0120221	0.0480736	0.0372301
253	SEED	Carbohydrates	CO2 fixation	Photorespiration_(oxidative_C2_cycle)	Glycine dehydrogenase [decarboxylating] (glycine cleavage system P2 protein) (EC 1.4.4.2)	0.0313353	0.0189334	0.0345125	0.0540995	0.0755443	0.0744602
254	SEED	Carbohydrates	Monosaccharides	Fructose_utilization	1-phosphofructokinase (EC 2.7.1.56)	0.0179059	0.0315557	0.0460167	0.0420774	0.020603	0.130305
255	SEED	Carbohydrates	Di- and oligosaccharides	Fructooligosaccharides(FOS)_and_Raffinose_Utilization	MSM (multiple sugar metabolism) operon regulatory protein	0.0581942	0.0946671	0.0517688	0.0420774	0.020603	0.018615
256	SEED	Carbohydrates	Monosaccharides	D-Galacturonate_and_D-Glucuronate_Utilization	Uronate isomerase (EC 5.3.1.12)	0.0537177	0.0504891	0.0460167	0.0540995	0.0686766	0.00620501
257	SEED	Carbohydrates	Monosaccharides	D-galactarate,_D-glucarate_and_D-glycerate_catabolism	Sugar diacid utilization regulator SdaR	0.0761001	0.0694225	0.0345125	0.0300553	0.041206	0.0248201
258	SEED	Carbohydrates	Monosaccharides	L-rhamnose_utilization	Rhamnogalacturonides degradation protein RhiN	0.0761001	0.0315557	0.0172563	0.0841548	0.041206	0.0248201
259	SEED	Carbohydrates	Aminosugars	Chitin_and_N-acetylglucosamine_utilization	Chitin binding protein	0.0895295	0.0568003	0.0287604	0.0480885	0.00686766	0.0372301
260	SEED	Carbohydrates	Monosaccharides	D-Galacturonate_and_D-Glucuronate_Utilization	Mannonate dehydratase (EC 4.2.1.8)	0.00895295	0.044178	0.0862813	0.0601106	0.0480736	0.018615
261	SEED	Carbohydrates	Sugar alcohols	Di-Inositol-Phosphate_biosynthesis	Inositol-1-phosphate synthase (EC 5.5.1.4)	0.0358118	0.0315557	0.069025	0.0120221	0.0618089	0.0558451
262	SEED	Carbohydrates	Monosaccharides	L-rhamnose_utilization	rhamnogalacturonan acetylesterase	0.0537177	0.0504891	0.0115042	0.096177	0.0343383	0.018615
263	SEED	Carbohydrates	Fermentation	Acetyl-CoA_fermentation_to_Butyrate	Butyryl-CoA dehydrogenase (EC 1.3.99.2)	0.0402883	0.0820448	0.0345125	0.0540995	0.0274706	0.0248201
264	SEED	Carbohydrates	Di- and oligosaccharides	Maltose_and_Maltodextrin_Utilization	Maltose/maltodextrin ABC transporter, permease protein MalF	0.0223824	0.044178	0.069025	0.0420774	0.041206	0.0434351
265	SEED	Carbohydrates	Monosaccharides	D-Galacturonate_and_D-Glucuronate_Utilization	Altronate hydrolase (EC 4.2.1.7)	0.0223824	0.0631114	0.0345125	0.0480885	0.0618089	0.0310251
266	SEED	Carbohydrates	Di- and oligosaccharides	Maltose_and_Maltodextrin_Utilization	Maltose operon transcriptional repressor MalR, LacI family	0.0581942	0.0252446	0.0632729	0.0601106	0.0274706	0.0248201
267	SEED	Carbohydrates	Central carbohydrate metabolism	Pyruvate_metabolism_I:_anaplerotic_reactions,_PEP	Malate permease	0.0313353	0.0504891	0.0345125	0.0420774	0.0137353	0.0806652
268	SEED	Carbohydrates	Lacto-N-Biose_I_and_Galacto-N-Biose_Metabolic_Pathway	Lacto-N-biose phosphorylase (EC 2.4.1.211)	Lacto-N-biose phosphorylase (EC 2.4.1.211)	0.0447648	0.0378668	0.0517688	0.0360664	0.0480736	0.0310251
269	SEED	Carbohydrates	Monosaccharides	Xylose_utilization	predicted xylose isomerase	0.0895295	0.0631114	0.0287604	0.00601106	0.0480736	0.01241
270	SEED	Carbohydrates	Di- and oligosaccharides	Trehalose_Uptake_and_Utilization	Beta-phosphoglucomutase (EC 5.4.2.6)	0.0447648	0.0378668	0.0460167	0.0540995	0.0549413	0.00620501
271	SEED	Carbohydrates	Monosaccharides	Deoxyribose_and_Deoxynucleoside_Catabolism	Phosphopentomutase (EC 5.4.2.7)	0.0492412	0.0189334	0.0805292	0.0540995	0.020603	0.018615
272	SEED	Carbohydrates	Monosaccharides	Deoxyribose_and_Deoxynucleoside_Catabolism	Putative deoxyribose-specific ABC transporter, permease protein	0.0716236	0.0504891	0.0287604	0.0480885	0.020603	0.018615
273	SEED	Carbohydrates	Di- and oligosaccharides	Maltose_and_Maltodextrin_Utilization	Maltose regulon modulator	0.085053	0.044178	0.00575209	0.0360664	0.0480736	0.018615
274	SEED	Carbohydrates	Central carbohydrate metabolism	Pyruvate_metabolism_II:_acetyl-CoA,_acetogenesis_from_pyruvate	NAD-dependent protein deacetylase of SIR2 family	0.0537177	0.0315557	0.0460167	0.0540995	0.0274706	0.0248201
275	SEED	Carbohydrates	CO2 fixation	Photorespiration_(oxidative_C2_cycle)	Glycine dehydrogenase [decarboxylating] (glycine cleavage system P1 protein) (EC 1.4.4.2)	0.0134294	0.0315557	0.0517688	0.0240442	0.0549413	0.0558451
276	SEED	Carbohydrates	Monosaccharides	Hexose_Phosphate_Uptake_System	Predicted glucose transporter in b-glucoside utilization gene cluster	0.0223824	0.0252446	0.0287604	0.00601106	0.0549413	0.0930752
277	SEED	Carbohydrates	Di- and oligosaccharides	Trehalose_Uptake_and_Utilization	Trehalose-6-phosphate hydrolase (EC 3.2.1.93)	0.0179059	0.0504891	0.0575209	0.0240442	0.0274706	0.0434351
278	SEED	Carbohydrates	Di- and oligosaccharides	Maltose_and_Maltodextrin_Utilization	Maltose O-acetyltransferase (EC 2.3.1.79)	0.0313353	0.0252446	0.0517688	0.0420774	0.041206	0.0248201
279	SEED	Carbohydrates	Sugar alcohols	Mannitol_Utilization	HPr kinase/phosphorylase (EC 2.7.1.-) (EC 2.7.4.-)	0.0268589	0.0568003	0.0172563	0.0540995	0.041206	0.018615
280	SEED	Carbohydrates	Monosaccharides	D-Tagatose_and_Galactitol_Utilization	PTS system, galactitol-specific IIC component (EC 2.7.1.69)	0.0134294	0.0189334	0.0575209	0.0360664	0.0274706	0.0558451
281	SEED	Carbohydrates	One-carbon Metabolism	Serine-glyoxylate_cycle	hydroxypyruvate reductase	0.0268589	0.0189334	0.0460167	0.0360664	0.0480736	0.0310251
282	SEED	Carbohydrates	Monosaccharides	L-rhamnose_utilization	predicted alpha-L-rhamnosidase	0.0447648	0.044178	0.00575209	0.0540995	0.020603	0.0372301
283	SEED	Carbohydrates	Fermentation	Acetyl-CoA_fermentation_to_Butyrate	Acetyl-CoA acetyltransferase (EC 2.3.1.9)	0.0358118	0.0315557	0.0287604	0.0360664	0.0480736	0.0248201
284	SEED	Carbohydrates	Di- and oligosaccharides	Maltose_and_Maltodextrin_Utilization	Maltose/maltodextrin ABC transporter, substrate binding periplasmic protein MalE	0.0313353	0.0315557	0.0230083	0.0300553	0.0755443	0.01241
285	SEED	Carbohydrates	Central carbohydrate metabolism	Pyruvate_Alanine_Serine_Interconversions	Alanine dehydrogenase (EC 1.4.1.1)	0.0268589	0.0252446	0.0402646	0.0180332	0.041206	0.0496401
286	SEED	Carbohydrates	Monosaccharides	D-Galacturonate_and_D-Glucuronate_Utilization	Altronate oxidoreductase (EC 1.1.1.58)	0.0223824	0.0631114	0.0287604	0.0480885	0.0137353	0.0248201
287	SEED	Carbohydrates	Central carbohydrate metabolism	Methylglyoxal_Metabolism	Methylglyoxal synthase (EC 4.2.3.3)	0.0268589	0.00631114	0.0747771	0.0360664	0	0.0496401
288	SEED	Carbohydrates	Sugar alcohols	Glycerol_fermenation_to_1,3-propanediol	Cob(I)alamin adenosyltransferase PduO (EC 2.5.1.17)	0.0223824	0.0126223	0.0172563	0.0240442	0.0480736	0.0682552
289	SEED	Carbohydrates	Organic acids	Propionyl-CoA_to_Succinyl-CoA_Module	Methylmalonyl-CoA epimerase (EC 5.1.99.1)	0.0179059	0.0315557	0.0172563	0.0480885	0.0274706	0.0496401
290	SEED	Carbohydrates	Organic acids	Propionyl-CoA_to_Succinyl-CoA_Module	Methylmalonyl-CoA decarboxylase, beta chain (EC 4.1.1.41)	0.0268589	0.0315557	0.00575209	0.0300553	0.041206	0.0558451
291	SEED	Carbohydrates	Monosaccharides	L-rhamnose_utilization	Transcriptional regulator of rhamnose utilization, AraC family	0.0358118	0.0504891	0.0402646	0.0240442	0.020603	0.01241
292	SEED	Carbohydrates	One-carbon Metabolism	Serine-glyoxylate_cycle	Fumarate hydratase class I, anaerobic (EC 4.2.1.2)	0.0179059	0.0126223	0.0402646	0.0300553	0.0549413	0.0248201
293	SEED	Carbohydrates	Aminosugars	Chitin_and_N-acetylglucosamine_utilization	Chitinase (EC 3.2.1.14)	0.0358118	0.0315557	0.0115042	0.0480885	0.0274706	0.0248201
294	SEED	Carbohydrates	Fermentation	Acetoin,_butanediol_metabolism	Dihydrolipoamide dehydrogenase of acetoin dehydrogenase (EC 1.8.1.4)	0.0223824	0.044178	0.00575209	0.0480885	0.0274706	0.0310251
295	SEED	Carbohydrates	Organic acids	Lactate_utilization	L-lactate permease	0.0402883	0.0315557	0.0230083	0.0240442	0.041206	0.018615
296	SEED	Carbohydrates	Fermentation	Fermentations:_Lactate	D-lactate dehydrogenase (EC 1.1.1.28)	0.0402883	0.044178	0.00575209	0.0360664	0.0137353	0.0372301
297	SEED	Carbohydrates	Sugar alcohols	Ribitol,_Xylitol,_Arabitol,_Mannitol_and_Sorbitol_utilization	Sorbitol dehydrogenase (EC 1.1.1.14)	0.0223824	0.044178	0.0460167	0.0240442	0.020603	0.018615
298	SEED	Carbohydrates	Fermentation	Acetyl-CoA_fermentation_to_Butyrate	3-hydroxybutyryl-CoA dehydratase (EC 4.2.1.55)	0.0268589	0.0252446	0.0345125	0.0360664	0.0343383	0.018615
299	SEED	Carbohydrates	Monosaccharides	L-rhamnose_utilization	Lactaldehyde reductase (EC 1.1.1.77)	0.0268589	0.0315557	0.0345125	0.0360664	0.0274706	0.018615
300	SEED	Carbohydrates	Monosaccharides	L-rhamnose_utilization	Predicted L-lactate dehydrogenase, Iron-sulfur cluster-binding subunit YkgF	0.0268589	0.0189334	0.0402646	0.0300553	0.0274706	0.0310251
301	SEED	Carbohydrates	Fermentation	Acetyl-CoA_fermentation_to_Butyrate	Butyrate kinase (EC 2.7.2.7)	0.0313353	0.0568003	0.0172563	0.0420774	0.020603	0.00620501
302	SEED	Carbohydrates	Di- and oligosaccharides	Beta-Glucoside_Metabolism	PTS system, cellobiose-specific IIC component (EC 2.7.1.69)	0.0134294	0.0631114	0.0345125	0.0360664	0.0137353	0.01241
303	SEED	Carbohydrates	Organic acids	Lactate_utilization	Predicted D-lactate dehydrogenase, Fe-S protein, FAD/FMN-containing	0.00895295	0.0252446	0.00575209	0.0120221	0.0686766	0.0496401
304	SEED	Carbohydrates	Monosaccharides	L-Arabinose_utilization	Protein AraJ precursor	0.0179059	0.0189334	0.0172563	0.0300553	0.041206	0.0434351
305	SEED	Carbohydrates	Di- and oligosaccharides	Beta-Glucoside_Metabolism	Beta-glucanase precursor (EC 3.2.1.73)	0.0268589	0.0504891	0.0172563	0.0120221	0.0480736	0.01241
306	SEED	Carbohydrates	One-carbon Metabolism	One-carbon_metabolism_by_tetrahydropterines	5-formyltetrahydrofolate cyclo-ligase (EC 6.3.3.2)	0.0358118	0.0252446	0.0402646	0.0180332	0.041206	0.00620501
307	SEED	Carbohydrates	Di- and oligosaccharides	Maltose_and_Maltodextrin_Utilization	Cytoplasmic alpha-amylase (EC 3.2.1.1)	0.0358118	0.0252446	0.0172563	0.0240442	0.0480736	0.01241
308	SEED	Carbohydrates	CO2 fixation	Photorespiration_(oxidative_C2_cycle)	Glycine dehydrogenase [decarboxylating] (glycine cleavage system P protein) (EC 1.4.4.2)	0.0313353	0.0252446	0.00575209	0.0661217	0.0137353	0.018615
309	SEED	Carbohydrates	Central carbohydrate metabolism	Entner-Doudoroff_Pathway	Phosphoglycerate mutase (EC 5.4.2.1)	0.0402883	0.0252446	0.00575209	0.0300553	0.0137353	0.0434351
310	SEED	Carbohydrates	Di- and oligosaccharides	Lactose_and_Galactose_Uptake_and_Utilization	Lactose phosphotransferase system repressor	0.0358118	0.0189334	0.0287604	0.00601106	0.00686766	0.0620501
311	SEED	Carbohydrates	Di- and oligosaccharides	Melibiose_Utilization	Melibiose carrier protein, Na+/melibiose symporter	0.0313353	0.0126223	0.0402646	0.0120221	0.041206	0.018615
312	SEED	Carbohydrates	Monosaccharides	L-fucose_utilization	L-fucose isomerase (EC 5.3.1.25)	0.0313353	0.0189334	0.0230083	0.0240442	0.0274706	0.0310251
313	SEED	Carbohydrates	Sugar alcohols	Glycerol_and_Glycerol-3-phosphate_Uptake_and_Utilization	Glycerol-3-phosphate ABC transporter, periplasmic glycerol-3-phosphate-binding protein (TC 3.A.1.1.3)	0.0223824	0.0568003	0.0115042	0.0180332	0.0343383	0.01241
314	SEED	Carbohydrates	Central carbohydrate metabolism	TCA_Cycle	Fumarate hydratase class II (EC 4.2.1.2)	0.0358118	0.0315557	0.0230083	0.0300553	0.0274706	0.00620501
315	SEED	Carbohydrates	Monosaccharides	Xylose_utilization	Predicted beta-xyloside ABC transporter, substrate-binding component	0.0268589	0.0378668	0.0172563	0.0240442	0.0343383	0.01241
316	SEED	Carbohydrates	Monosaccharides	L-Arabinose_utilization	Alpha-L-arabinofuranosidase II precursor (EC 3.2.1.55)	0.0268589	0.0504891	0	0.0480885	0.020603	0.00620501
317	SEED	Carbohydrates	Di- and oligosaccharides	Lactose_and_Galactose_Uptake_and_Utilization	Galactose/methyl galactoside ABC transport system, permease protein MglC (TC 3.A.1.2.3)	0.0268589	0.0315557	0.0230083	0.0240442	0.0343383	0.01241
318	SEED	Carbohydrates	Di- and oligosaccharides	Maltose_and_Maltodextrin_Utilization	Oligo-6-glucosidase (EC 3.2.1.10)	0.0313353	0.044178	0.00575209	0.0300553	0.0343383	0.00620501
319	SEED	Carbohydrates	Aminosugars	Chitin_and_N-acetylglucosamine_utilization	N-acetylglucosamine related transporter, NagX	0.00895295	0.0189334	0.0115042	0.0480885	0.0274706	0.0310251
320	SEED	Carbohydrates	Monosaccharides	L-rhamnose_utilization	Predicted rhamnogalacturonan lyase in rhamnose utilization cluster	0.0179059	0.0252446	0	0.0420774	0.041206	0.018615
321	SEED	Carbohydrates	Central carbohydrate metabolism	Methylglyoxal_Metabolism	Lactoylglutathione lyase (EC 4.4.1.5)	0.0402883	0	0.0287604	0.0300553	0.0137353	0.0310251
322	SEED	Carbohydrates	Monosaccharides	Xylose_utilization	Xyloside transporter XynT	0.0358118	0.0504891	0.00575209	0.0240442	0.0274706	0
323	SEED	Carbohydrates	CO2 fixation	Carboxysome	Carbonic anhydrase (EC 4.2.1.1)	0.0402883	0.0315557	0.0115042	0.0300553	0.0137353	0.01241
324	SEED	Carbohydrates	Monosaccharides	Xylose_utilization	D-xylose proton-symporter XylE	0.0179059	0	0.0115042	0.0540995	0.041206	0.01241
325	SEED	Carbohydrates	One-carbon Metabolism	One-carbon_metabolism_by_tetrahydropterines	Formiminotetrahydrofolate cyclodeaminase (EC 4.3.1.4)	0.0358118	0.0126223	0.00575209	0.0120221	0.0137353	0.0558451
326	SEED	Carbohydrates	Monosaccharides	Xylose_utilization	Predicted beta-xyloside ABC transporter, ATP-binding component	0.0402883	0.0315557	0.0517688	0.0120221	0	0
327	SEED	Carbohydrates	Monosaccharides	D-Tagatose_and_Galactitol_Utilization	Galactitol-1-phosphate 5-dehydrogenase (EC 1.1.1.251)	0.0358118	0.0315557	0.0172563	0.0180332	0.00686766	0.0248201
328	SEED	Carbohydrates	Monosaccharides	L-rhamnose_utilization	Predicted rhamnose oligosaccharide ABC transport system, permease component 2	0.0223824	0.044178	0.00575209	0.0601106	0	0
329	SEED	Carbohydrates	Fermentation	Fermentations:_Mixed_acid	Sugar/maltose fermentation stimulation protein homolog	0.0179059	0.0126223	0.0115042	0.0300553	0.020603	0.0372301
330	SEED	Carbohydrates	Sugar alcohols	Mannitol_Utilization	Phosphocarrier protein of PTS system	0.0134294	0.0315557	0.0345125	0.0420774	0.00686766	0
331	SEED	Carbohydrates	Monosaccharides	D-ribose_utilization	Ribose ABC transport system, periplasmic ribose-binding protein RbsB (TC 3.A.1.2.1)	0.0358118	0.0189334	0.0172563	0.0240442	0.0137353	0.018615
332	SEED	Carbohydrates	Monosaccharides	Fructose_utilization	Transcriptional repressor of the fructose operon, DeoR family	0.0268589	0.00631114	0.00575209	0.00601106	0.0274706	0.0558451
333	SEED	Carbohydrates	Di- and oligosaccharides	Lactose_and_Galactose_Uptake_and_Utilization	Galactose/methyl galactoside ABC transport system, D-galactose-binding periplasmic protein MglB (TC 3.A.1.2.3)	0.0268589	0.00631114	0.0115042	0.0240442	0.0343383	0.0248201
334	SEED	Carbohydrates	Monosaccharides	L-Arabinose_utilization	Arabinose-proton symporter	0.00895295	0.00631114	0.0115042	0.0300553	0.0274706	0.0434351
335	SEED	Carbohydrates	Fermentation	Acetyl-CoA_fermentation_to_Butyrate	3-hydroxybutyryl-CoA dehydrogenase (EC 1.1.1.157)	0.0313353	0.00631114	0.0287604	0.0120221	0.0343383	0.01241
336	SEED	Carbohydrates	Organic acids	Lactate_utilization	Predicted L-lactate dehydrogenase, Fe-S oxidoreductase subunit YkgE	0.0179059	0.00631114	0.0287604	0.0120221	0.0274706	0.0310251
337	SEED	Carbohydrates	Di- and oligosaccharides	Sucrose_utilization	Sucrose operon repressor ScrR, LacI family	0.0268589	0.0378668	0.00575209	0.0180332	0.0343383	0
338	SEED	Carbohydrates	Monosaccharides	Xylose_utilization	Xylose repressor XylR (ROK family)	0.0402883	0.0378668	0.00575209	0.0180332	0.020603	0
339	SEED	Carbohydrates	One-carbon Metabolism	One-carbon_metabolism_by_tetrahydropterines	Formyltetrahydrofolate deformylase (EC 3.5.1.10)	0.00895295	0.0252446	0.0632729	0	0	0.0248201
340	SEED	Carbohydrates	Monosaccharides	L-Arabinose_utilization	L-arabinose-specific 1-epimerase (mutarotase)	0.00895295	0.0315557	0.0345125	0.0180332	0.0274706	0
341	SEED	Carbohydrates	Monosaccharides	L-rhamnose_utilization	Rhamnulokinase (EC 2.7.1.5)	0.00895295	0.0189334	0.0287604	0.0240442	0.00686766	0.0310251
342	SEED	Carbohydrates	Monosaccharides	Deoxyribose_and_Deoxynucleoside_Catabolism	Putative deoxyribonuclease YjjV	0.00447648	0.0252446	0.0632729	0.0120221	0	0.01241
343	SEED	Carbohydrates	Fermentation	Acetyl-CoA_fermentation_to_Butyrate	Phosphate butyryltransferase (EC 2.3.1.19)	0.0313353	0.0252446	0	0.00601106	0.0480736	0.00620501
344	SEED	Carbohydrates	Central carbohydrate metabolism	TCA_Cycle	Isocitrate dehydrogenase [NAD] (EC 1.1.1.41)	0.0134294	0.0189334	0.0460167	0.0180332	0.00686766	0.01241
345	SEED	Carbohydrates	Di- and oligosaccharides	Lactose_utilization	Evolved beta-D-galactosidase, alpha subunit	0.00895295	0.00631114	0.00575209	0	0.0755443	0.018615
346	SEED	Carbohydrates	Monosaccharides	L-Arabinose_utilization	Arabinose operon regulatory protein	0.0179059	0.0126223	0.0460167	0.00601106	0.0137353	0.018615
347	SEED	Carbohydrates	Sugar alcohols	Inositol_catabolism	Inositol transport system ATP-binding protein	0.0223824	0.0315557	0.0345125	0.00601106	0.0137353	0.00620501
348	SEED	Carbohydrates	Monosaccharides	L-rhamnose_utilization	L-rhamnose-proton symporter	0.0223824	0.00631114	0.00575209	0.0120221	0.0549413	0.01241
349	SEED	Carbohydrates	Fermentation	Acetyl-CoA_fermentation_to_Butyrate	Ferredoxin-like protein	0.0402883	0.0189334	0.0345125	0.00601106	0.0137353	0
350	SEED	Carbohydrates	Monosaccharides	Xylose_utilization	D-xylose transport ATP-binding protein XylG	0.0447648	0.0126223	0.0172563	0.0120221	0.020603	0.00620501
351	SEED	Carbohydrates	Central carbohydrate metabolism	Pyruvate_metabolism_I:_anaplerotic_reactions,_PEP	Phosphoenolpyruvate carboxykinase [GTP] (EC 4.1.1.32)	0.0492412	0.00631114	0.0115042	0.0180332	0.0274706	0
352	SEED	Carbohydrates	Monosaccharides	L-Arabinose_utilization	Alpha-N-arabinofuranosidase 2 (EC 3.2.1.55)	0.0134294	0	0.0345125	0.0300553	0.020603	0.01241
353	SEED	Carbohydrates	CO2 fixation	Photorespiration_(oxidative_C2_cycle)	2-hydroxy-3-oxopropionate reductase (EC 1.1.1.60)	0.00447648	0.0126223	0.0230083	0.0300553	0.0274706	0.01241
354	SEED	Carbohydrates	Monosaccharides	L-Arabinose_utilization	Transcriptional repressor of the arabinose operon	0.0223824	0.0252446	0.00575209	0.0360664	0.00686766	0.01241
355	SEED	Carbohydrates	Monosaccharides	Xylose_utilization	Xylose isomerase (EC 5.3.1.5)	0.00447648	0.0126223	0.0402646	0.0180332	0.0137353	0.018615
356	SEED	Carbohydrates	Monosaccharides	Deoxyribose_and_Deoxynucleoside_Catabolism	Pyrimidine-nucleoside phosphorylase (EC 2.4.2.2)	0.0223824	0.0252446	0.0287604	0.0180332	0.00686766	0.00620501
357	SEED	Carbohydrates	Monosaccharides	L-rhamnose_utilization	L-rhamnose isomerase (EC 5.3.1.14)	0.00447648	0.0315557	0.00575209	0.0120221	0.0274706	0.0248201
358	SEED	Carbohydrates	Monosaccharides	L-Arabinose_utilization	L-arabinose transport system permease protein (TC 3.A.1.2.2)	0.0358118	0.0252446	0.0287604	0	0.0137353	0
359	SEED	Carbohydrates	Monosaccharides	L-rhamnose_utilization	Predicted rhamnose oligosaccharide ABC transport system, permease component	0.0268589	0.0126223	0.0115042	0.0240442	0.020603	0.00620501
360	SEED	Carbohydrates	CO2 fixation	Photorespiration_(oxidative_C2_cycle)	Glycine cleavage system H protein	0.0134294	0.00631114	0	0.0300553	0.0137353	0.0372301
361	SEED	Carbohydrates	Central carbohydrate metabolism	Pyruvate_metabolism_I:_anaplerotic_reactions,_PEP	Pyruvate carboxyl transferase subunit B (EC 6.4.1.1)	0.0134294	0.0378668	0.0230083	0	0.0137353	0.01241
362	SEED	Carbohydrates	Central carbohydrate metabolism	Pyruvate:ferredoxin_oxidoreductase	Pyruvate:ferredoxin oxidoreductase, beta subunit (EC 1.2.7.1)	0.0313353	0.0315557	0	0	0.0343383	0
363	SEED	Carbohydrates	Di- and oligosaccharides	Sucrose_utilization	Family 13 glycosyl hydrolase, row 724	0.00895295	0.0315557	0	0.0360664	0.0137353	0.00620501
364	SEED	Carbohydrates	Fermentation	Acetoin,_butanediol_metabolism	Acetoin dehydrogenase E1 component beta-subunit (EC 1.2.4.-)	0.0268589	0.0315557	0	0.0240442	0.00686766	0.00620501
365	SEED	Carbohydrates	Aminosugars	Chitin_and_N-acetylglucosamine_utilization	Predicted transcriptional regulator of N-Acetylglucosamine utilization, GntR family	0.0179059	0.00631114	0.0230083	0.0480885	0	0
366	SEED	Carbohydrates	Fermentation	Fermentations:_Mixed_acid	Formate efflux transporter (TC 2.A.44 family)	0.0134294	0.0252446	0.0115042	0.0180332	0.020603	0.00620501
367	SEED	Carbohydrates	Organic acids	Propionyl-CoA_to_Succinyl-CoA_Module	Propionyl-CoA carboxylase carboxyl transferase subunit (EC 6.4.1.3)	0.0313353	0.0189334	0	0.0120221	0.00686766	0.0248201
368	SEED	Carbohydrates	Central carbohydrate metabolism	TCA_Cycle	Fumarate hydratase class I (EC 4.2.1.2)	0.00895295	0.0126223	0.0115042	0.0240442	0.020603	0.01241
369	SEED	Carbohydrates	Sugar alcohols	Ethanolamine_utilization	Ethanolamine two-component response regulator	0.0179059	0.0126223	0.0345125	0.0120221	0	0.01241
370	SEED	Carbohydrates	CO2 fixation	Photorespiration_(oxidative_C2_cycle)	Serine--glyoxylate aminotransferase (EC 2.6.1.45)	0.0134294	0.0315557	0.0230083	0.0120221	0	0.00620501
371	SEED	Carbohydrates	One-carbon Metabolism	Serine-glyoxylate_cycle	Propionyl-CoA carboxylase beta chain (EC 6.4.1.3)	0.0134294	0.0189334	0	0	0.0343383	0.018615
372	SEED	Carbohydrates	Central carbohydrate metabolism	Pyruvate_metabolism_I:_anaplerotic_reactions,_PEP	Phosphoenolpyruvate synthase (EC 2.7.9.2)	0.0268589	0.00631114	0.00575209	0.00601106	0.0274706	0.01241
373	SEED	Carbohydrates	Sugar alcohols	Mannitol_Utilization	Mannitol-1-phosphate 5-dehydrogenase (EC 1.1.1.17)	0.00447648	0.0126223	0.00575209	0.00601106	0.0549413	0
374	SEED	Carbohydrates	Di- and oligosaccharides	Beta-Glucoside_Metabolism	Predicted b-glucoside transporter, GPH family	0.0134294	0.0189334	0	0.0180332	0.00686766	0.0248201
375	SEED	Carbohydrates	Sugar alcohols	Glycerol_and_Glycerol-3-phosphate_Uptake_and_Utilization	Glycerol-3-phosphate transporter	0.00447648	0.00631114	0.00575209	0.0180332	0.041206	0.00620501
376	SEED	Carbohydrates	Monosaccharides	L-fucose_utilization	Possible fucose ABC transporter, ATP-binding component	0.0402883	0.0126223	0.0230083	0.00601106	0	0
377	SEED	Carbohydrates	Glycoside hydrolases	Predicted_carbohydrate_hydrolases	COG1306 predicted glycoside hydrolase	0.0134294	0.0189334	0.0287604	0	0.020603	0
378	SEED	Carbohydrates	Di- and oligosaccharides	Maltose_and_Maltodextrin_Utilization	Mlc, transcriptional repressor of MalT (the transcriptional activator of maltose regulon) and manXYZ operon	0.0179059	0.00631114	0.00575209	0.0180332	0.0137353	0.018615
379	SEED	Carbohydrates	Central carbohydrate metabolism	Pentose_phosphate_pathway	Glucose-6-phosphate 1-dehydrogenase (EC 1.1.1.49)	0	0.00631114	0.0172563	0.0120221	0.0137353	0.0310251
380	SEED	Carbohydrates	Central carbohydrate metabolism	Pyruvate_metabolism_I:_anaplerotic_reactions,_PEP	Phosphoenolpyruvate carboxylase (EC 4.1.1.31)	0.0223824	0.0252446	0.0115042	0	0.0137353	0.00620501
381	SEED	Carbohydrates	Di- and oligosaccharides	Beta-Glucoside_Metabolism	Beta-glucoside bgl operon antiterminator, BglG family	0.0179059	0.00631114	0.0115042	0.0300553	0.00686766	0.00620501
382	SEED	Carbohydrates	One-carbon Metabolism	Formaldehyde_assimilation:_Ribulose_monophosphate_pathway	Transcriptional regulator HxlR, formaldehyde assimilation	0.00895295	0.0315557	0.0115042	0.0120221	0	0.01241
383	SEED	Carbohydrates	Organic acids	Methylcitrate_cycle	Propionate catabolism operon regulatory protein PrpR	0.0134294	0.0504891	0	0.00601106	0	0.00620501
384	SEED	Carbohydrates	Di- and oligosaccharides	Trehalose_Uptake_and_Utilization	Maltose-6'-phosphate glucosidase (EC 3.2.1.122)	0	0.00631114	0.0115042	0.0180332	0.0274706	0.01241
385	SEED	Carbohydrates	Monosaccharides	L-fucose_utilization	L-fuculokinase (EC 2.7.1.51)	0.00447648	0.0315557	0	0.0120221	0.0274706	0
386	SEED	Carbohydrates	Central carbohydrate metabolism	Pyruvate:ferredoxin_oxidoreductase	Pyruvate:ferredoxin oxidoreductase, alpha subunit (EC 1.2.7.1)	0.0134294	0.00631114	0.0115042	0.0300553	0.0137353	0
387	SEED	Carbohydrates	Central carbohydrate metabolism	Pentose_phosphate_pathway	6-phosphogluconolactonase (EC 3.1.1.31)	0.0179059	0.0189334	0.00575209	0	0.00686766	0.0248201
388	SEED	Carbohydrates	Di- and oligosaccharides	Maltose_and_Maltodextrin_Utilization	Maltose/maltodextrin transport ATP-binding protein MalK (EC 3.6.3.19)	0.0134294	0.0126223	0.0115042	0.0300553	0	0.00620501
389	SEED	Carbohydrates	Central carbohydrate metabolism	Pentose_phosphate_pathway	Transaldolase (EC 2.2.1.2)	0.0134294	0.00631114	0.0287604	0.0180332	0.00686766	0
390	SEED	Carbohydrates	Monosaccharides	Mannose_Metabolism	PTS system, mannose-specific IID component (EC 2.7.1.69)	0.0223824	0.00631114	0.0115042	0.00601106	0.020603	0.00620501
391	SEED	Carbohydrates	CO2 fixation	Photorespiration_(oxidative_C2_cycle)	Glyoxylate carboligase (EC 4.1.1.47)	0.00895295	0.0126223	0.0172563	0	0.0137353	0.018615
392	SEED	Carbohydrates	Central carbohydrate metabolism	Pyruvate_metabolism_II:_acetyl-CoA,_acetogenesis_from_pyruvate	Dihydrolipoamide dehydrogenase of pyruvate dehydrogenase complex (EC 1.8.1.4)	0.00895295	0	0.0345125	0	0.020603	0.00620501
393	SEED	Carbohydrates	Fermentation	Acetyl-CoA_fermentation_to_Butyrate	Acetoacetate metabolism regulatory protein AtoC	0.0134294	0.0126223	0.0115042	0	0.0137353	0.018615
394	SEED	Carbohydrates	One-carbon Metabolism	Serine-glyoxylate_cycle	GDSL-like lipase/acylhydrolase	0	0.00631114	0.0115042	0.0120221	0.020603	0.018615
395	SEED	Carbohydrates	Monosaccharides	D-Galacturonate_and_D-Glucuronate_Utilization	Pectin degradation protein KdgF	0.0223824	0.0189334	0	0.00601106	0.020603	0
396	SEED	Carbohydrates	Di- and oligosaccharides	Trehalose_Uptake_and_Utilization	PTS system, glucose-specific IIA component (EC 2.7.1.69)	0.0223824	0.0126223	0.0230083	0.00601106	0	0
397	SEED	Carbohydrates	One-carbon Metabolism	Methanogenesis_from_methylated_compounds	Methylcobalamin:coenzyme M methyltransferase, methylamine-specific	0.00447648	0.00631114	0.0345125	0.0120221	0	0.00620501
398	SEED	Carbohydrates	Sugar alcohols	Ethanolamine_utilization	Acetaldehyde dehydrogenase, ethanolamine utilization cluster	0.0134294	0.00631114	0.0115042	0.0120221	0.0137353	0.00620501
399	SEED	Carbohydrates	Central carbohydrate metabolism	Pentose_phosphate_pathway	6-phosphogluconate dehydrogenase, decarboxylating (EC 1.1.1.44)	0.00895295	0.00631114	0.0115042	0.0300553	0	0.00620501
400	SEED	Carbohydrates	Organic acids	Lactate_utilization	Lactate-responsive regulator LldR in Firmicutes, GntR family	0.0134294	0.00631114	0.0115042	0.00601106	0.00686766	0.018615
401	SEED	Carbohydrates	Monosaccharides	L-rhamnose_utilization	Rhamnulose-1-phosphate aldolase (EC 4.1.2.19)	0.0179059	0.00631114	0	0.00601106	0.0137353	0.018615
402	SEED	Carbohydrates	One-carbon Metabolism	Serine-glyoxylate_cycle	decarboxylase	0.0223824	0.00631114	0.00575209	0	0.0274706	0
403	SEED	Cell Division and Cell Cycle	Control of Macromolecuar Synthesis	Macromolecular_synthesis_operon	Carbamoyl-phosphate synthase large chain (EC 6.3.5.5)	0.461077	0.359735	0.511936	0.534984	0.315912	0.359891
404	SEED	Cell Division and Cell Cycle	Cell cycle in Prokaryota	Bacterial_Cytoskeleton	Stage 0 sporulation protein J	0.295447	0.252446	0.339373	0.276509	0.185427	0.235791
405	SEED	Cell Division and Cell Cycle	Cell cycle in Prokaryota	Two_cell_division_clusters_relating_to_chromosome_partitioning	Chromosome partition protein smc	0.183536	0.189334	0.155306	0.312575	0.123618	0.0868702
406	SEED	Cell Division and Cell Cycle	Cell cycle in Prokaryota	Bacterial_Cytoskeleton	Sporulation initiation inhibitor protein Soj	0.205918	0.22089	0.0920334	0.126232	0.130486	0.1241
407	SEED	Cell Division and Cell Cycle	Control of Macromolecuar Synthesis	Macromolecular_synthesis_operon	Carbamoyl-phosphate synthase small chain (EC 6.3.5.5)	0.0671471	0.0946671	0.16681	0.0901659	0.130486	0.11169
408	SEED	Cell Division and Cell Cycle	Cell cycle in Prokaryota	Bacterial_Cytoskeleton	Cell division protein FtsZ (EC 3.4.24.-)	0.102959	0.0378668	0.120794	0.11421	0.123618	0.105485
409	SEED	Cell Division and Cell Cycle	Cell cycle in Prokaryota	Bacterial_Cytoskeleton	Septum site-determining protein MinD	0.111912	0.0757337	0.0747771	0.0721327	0.164824	0.105485
410	SEED	Cell Division and Cell Cycle	Cell cycle in Prokaryota	Control_of_cell_elongation_-_division_cycle_in_Bacilli	Endonuclease III (EC 4.2.99.18)	0.0581942	0.0631114	0.0805292	0.0781438	0.0480736	0.0620501
411	SEED	Cell Division and Cell Cycle	Cell cycle in Prokaryota	Bacterial_Cytoskeleton	MreB-like protein (Mbl protein)	0.0671471	0.0946671	0.0172563	0.0420774	0.041206	0.0372301
412	SEED	Cell Division and Cell Cycle	Cell cycle in Prokaryota	Two_cell_division_clusters_relating_to_chromosome_partitioning	Segregation and condensation protein A	0.0358118	0.044178	0.0345125	0.0120221	0.0618089	0.00620501
413	SEED	Cell Division and Cell Cycle	Cell cycle in Prokaryota	Control_of_cell_elongation_-_division_cycle_in_Bacilli	FIG001721: Predicted N6-adenine-specific DNA methylase	0.0358118	0.044178	0.0345125	0.0300553	0.020603	0.0248201
414	SEED	Cell Division and Cell Cycle	Cell cycle in Prokaryota	Two_cell_division_clusters_relating_to_chromosome_partitioning	Segregation and condensation protein B	0.0268589	0.0378668	0.0345125	0.0120221	0.020603	0.0496401
415	SEED	Cell Division and Cell Cycle	Cell cycle in Prokaryota	Cyanobacterial_Circadian_Clock	Circadian phase modifier	0.0492412	0.0504891	0.0517688	0.0240442	0	0
416	SEED	Cell Division and Cell Cycle	Cell cycle in Prokaryota	Cyanobacterial_Circadian_Clock	Circadian input kinase A	0.0313353	0.0315557	0	0.0120221	0.0480736	0
417	SEED	Cell Division and Cell Cycle	Cell cycle in Prokaryota	Two_cell_division_clusters_relating_to_chromosome_partitioning	Pseudouridine synthase family protein	0.00447648	0	0.0345125	0.0240442	0.020603	0.018615
418	SEED	Cell Division and Cell Cycle	Cell cycle in Prokaryota	Two_cell_division_clusters_relating_to_chromosome_partitioning	Signal recognition particle associated protein	0.0313353	0.00631114	0.0172563	0.0180332	0	0.0248201
419	SEED	Cell Division and Cell Cycle	Cell cycle in Prokaryota	Control_of_cell_elongation_-_division_cycle_in_Bacilli	Recombination protein RecU	0.0223824	0.00631114	0	0.00601106	0	0.0434351
420	SEED	Cell Division and Cell Cycle	Cell cycle in Prokaryota	Two_cell_division_clusters_relating_to_chromosome_partitioning	Chromosome (plasmid) partitioning protein ParB-2	0	0.0189334	0.00575209	0.0120221	0.0137353	0.0248201
421	SEED	Cell Division and Cell Cycle	Cell cycle in Prokaryota	Two_cell_division_clusters_relating_to_chromosome_partitioning	Ribosomal large subunit pseudouridine synthase B (EC 4.2.1.70)	0.0268589	0.0126223	0.00575209	0	0.0137353	0.00620501
422	SEED	Cell Wall and Capsule	Capsular and extracellular polysacchrides	Alginate_metabolism	Probable poly(beta-D-mannuronate) O-acetylase (EC 2.3.1.-)	0.295447	0.353424	0.281852	0.372686	0.315912	0.192355
423	SEED	Cell Wall and Capsule	Capsular and extracellular polysacchrides	Rhamnose_containing_glycans	capsular polysaccharide biosynthesis protein	0.295447	0.233512	0.316365	0.300553	0.247236	0.328866
424	SEED	Cell Wall and Capsule	Peptidoglycan_Biosynthesis	Cell division protein FtsI [Peptidoglycan synthetase] (EC 2.4.1.129)	Cell division protein FtsI [Peptidoglycan synthetase] (EC 2.4.1.129), 6 4 3 4 2 33	0.308877	0.309246	0.201323	0.240442	0.199162	0.204765
425	SEED	Cell Wall and Capsule	Cell wall of Mycobacteria	linker_unit-arabinogalactan_synthesis	UDP-glucose 4-epimerase (EC 5.1.3.2)	0.255159	0.302935	0.212827	0.294542	0.164824	0.204765
426	SEED	Cell Wall and Capsule	Cell wall of Mycobacteria	linker_unit-arabinogalactan_synthesis	dTDP-glucose 6-dehydratase (EC 4.2.1.46)	0.250683	0.16409	0.258844	0.156288	0.20603	0.279226
427	SEED	Cell Wall and Capsule	Gram-Negative cell wall components	LOS_core_oligosaccharide_biosynthesis	Beta-3-glucosyltransferase	0.264112	0.252446	0.178315	0.216398	0.151089	0.18615
428	SEED	Cell Wall and Capsule	Capsular and extracellular polysacchrides	Colanic_acid_biosynthesis	Tyrosine-protein kinase Wzc (EC 2.7.10.2)	0.147724	0.132534	0.212827	0.192354	0.240368	0.322661
429	SEED	Cell Wall and Capsule	Peptidoglycan_Biosynthesis	D-alanyl-D-alanine carboxypeptidase (EC 3.4.16.4)	D-alanyl-D-alanine carboxypeptidase (EC 3.4.16.4), 5 3 3 3 2 16	0.246206	0.214579	0.218579	0.198365	0.164824	0.0992802
430	SEED	Cell Wall and Capsule	Capsular and extracellular polysacchrides	O-Methyl_Phosphoramidate_Capsule_Modification_in_Campylobacter	Pyruvate phosphate dikinase	0.111912	0.189334	0.230083	0.144265	0.240368	0.22338
431	SEED	Cell Wall and Capsule	UDP-N-acetylmuramate_from_Fructose-6-phosphate_Biosynthesis	Glucosamine--fructose-6-phosphate aminotransferase [isomerizing] (EC 2.6.1.16)	Glucosamine--fructose-6-phosphate aminotransferase [isomerizing] (EC 2.6.1.16)	0.143247	0.157778	0.207075	0.126232	0.2335	0.217175
432	SEED	Cell Wall and Capsule	Capsular and extracellular polysacchrides	CMP-N-acetylneuraminate_Biosynthesis	UDP-N-acetylglucosamine 2-epimerase (EC 5.1.3.14)	0.134294	0.201956	0.069025	0.138254	0.212897	0.16133
433	SEED	Cell Wall and Capsule	Gram-Negative cell wall components	Lipid_A-Ara4N_pathway_(_Polymyxin_resistance_)	UDP-glucose dehydrogenase (EC 1.1.1.22)	0.156677	0.145156	0.0747771	0.150277	0.212897	0.167535
434	SEED	Cell Wall and Capsule	Peptidoglycan_Biosynthesis	UDP-N-acetylglucosamine 1-carboxyvinyltransferase (EC 2.5.1.7)	UDP-N-acetylglucosamine 1-carboxyvinyltransferase (EC 2.5.1.7) 2 2 2 2 27	0.129818	0.145156	0.155306	0.156288	0.144221	0.167535
435	SEED	Cell Wall and Capsule	Peptidoglycan_Biosynthesis	Penicillin-binding protein 2 (PBP-2)	Penicillin-binding protein 2 (PBP-2)	0.138771	0.189334	0.120794	0.174321	0.137353	0.13651
436	SEED	Cell Wall and Capsule	Peptidoglycan_Biosynthesis	UDP-N-acetylmuramoylalanyl-D-glutamate--2,6-diaminopimelate ligase (EC 6.3.2.13)	UDP-N-acetylmuramoylalanyl-D-glutamate--6-diaminopimelate ligase (EC 6.3.2.13)	0.161153	0.113601	0.178315	0.16831	0.137353	0.130305
437	SEED	Cell Wall and Capsule	Peptidoglycan_Biosynthesis	Multimodular transpeptidase-transglycosylase (EC 2.4.1.129) (EC 3.4.-.-)	Multimodular transpeptidase-transglycosylase (EC 2.4.1.129) (EC 3.4.-.-) 3 3 2 2 11	0.125341	0.214579	0.172563	0.156288	0.137353	0.0682552
438	SEED	Cell Wall and Capsule	UDP-N-acetylmuramate_from_Fructose-6-phosphate_Biosynthesis	Phosphoglucosamine mutase (EC 5.4.2.10)	Phosphoglucosamine mutase (EC 5.4.2.10)	0.156677	0.113601	0.201323	0.0901659	0.0824119	0.204765
439	SEED	Cell Wall and Capsule	Cell wall of Mycobacteria	linker_unit-arabinogalactan_synthesis	Glucose-1-phosphate thymidylyltransferase (EC 2.7.7.24)	0.120865	0.132534	0.10929	0.11421	0.199162	0.13651
440	SEED	Cell Wall and Capsule	Peptidoglycan_Biosynthesis	Phospho-N-acetylmuramoyl-pentapeptide-transferase (EC 2.7.8.13)	Phospho-N-acetylmuramoyl-pentapeptide-transferase (EC 2.7.8.13) 1 2 1 2 31	0.120865	0.0946671	0.132298	0.096177	0.151089	0.192355
441	SEED	Cell Wall and Capsule	YjeE	YjeF protein, function unknown	YjeF protein, function unknown	0.0805766	0.107289	0.132298	0.132243	0.144221	0.1241
442	SEED	Cell Wall and Capsule	Peptidoglycan_Biosynthesis	UDP-N-acetylmuramate--alanine ligase (EC 6.3.2.8)	UDP-N-acetylmuramate--alanine ligase (EC 6.3.2.8) 1 2 2 8	0.0895295	0.119912	0.161058	0.132243	0.103015	0.11169
443	SEED	Cell Wall and Capsule	Peptidoglycan_Biosynthesis	D-alanine--D-alanine ligase (EC 6.3.2.4)	D-alanine--D-alanine ligase (EC 6.3.2.4) 2 3	0.116388	0.170401	0.0977854	0.096177	0.123618	0.0806652
444	SEED	Cell Wall and Capsule	Peptidoglycan_Biosynthesis	Monofunctional biosynthetic peptidoglycan transglycosylase (EC 2.4.2.-)	Monofunctional biosynthetic peptidoglycan transglycosylase (EC 2.4.2.-)	0.0626707	0.0946671	0.0920334	0.11421	0.178559	0.142715
445	SEED	Cell Wall and Capsule	Peptidoglycan_Biosynthesis	UDP-N-acetylmuramoylalanine--D-glutamate ligase (EC 6.3.2.9)	UDP-N-acetylmuramoylalanine--D-glutamate ligase (EC 6.3.2.9)	0.111912	0.0694225	0.10929	0.126232	0.0824119	0.117895
446	SEED	Cell Wall and Capsule	Cell wall of Mycobacteria	linker_unit-arabinogalactan_synthesis	dTDP-4-dehydrorhamnose reductase (EC 1.1.1.133)	0.0626707	0.0820448	0.0517688	0.096177	0.192294	0.1241
447	SEED	Cell Wall and Capsule	Gram-Negative cell wall components	Lipid_A-Ara4N_pathway_(_Polymyxin_resistance_)	UDP-4-amino-4-deoxy-L-arabinose--oxoglutarate aminotransferase (EC 2.6.1.-)	0.107435	0.107289	0.0517688	0.0841548	0.0618089	0.14892
448	SEED	Cell Wall and Capsule	Peptidoglycan_Biosynthesis	Rod shape-determining protein RodA	Rod shape-determining protein RodA	0.0716236	0.0946671	0.0460167	0.0721327	0.103015	0.0992802
449	SEED	Cell Wall and Capsule	Peptidoglycan_Biosynthesis	UDP-N-acetylenolpyruvoylglucosamine reductase (EC 1.1.1.158)	UDP-N-acetylenolpyruvoylglucosamine reductase (EC 1.1.1.158)	0.0626707	0.0946671	0.0977854	0.0781438	0.0824119	0.0558451
450	SEED	Cell Wall and Capsule	Capsular and extracellular polysacchrides	Capsular_heptose_biosynthesis	dTDP-4-dehydrorhamnose 5-epimerase (EC 5.1.3.13)	0.0537177	0.0504891	0.13805	0.0240442	0.109883	0.0930752
451	SEED	Cell Wall and Capsule	Peptidoglycan_Biosynthesis	UDP-N-acetylglucosamine--N-acetylmuramyl-(pentapeptide) pyrophosphoryl-undecaprenol N-acetylglucosamine transferase (EC 2.4.1.227)	UDP-N-acetylglucosamine--N-acetylmuramyl-(pentapeptide) pyrophosphoryl-undecaprenol N-acetylglucosamine transferase (EC 2.4.1.227)	0.0761001	0.0378668	0.132298	0.0781438	0.0480736	0.0744602
452	SEED	Cell Wall and Capsule	Capsular and extracellular polysacchrides	CMP-N-acetylneuraminate_Biosynthesis	N-Acetylneuraminate cytidylyltransferase (EC 2.7.7.43)	0.120865	0.0883559	0.0920334	0.0360664	0.0480736	0.0496401
453	SEED	Cell Wall and Capsule	Peptidoglycan_Biosynthesis	Glutamate racemase (EC 5.1.1.3)	Glutamate racemase (EC 5.1.1.3)	0.0268589	0.0315557	0.161058	0.0480885	0.0549413	0.11169
454	SEED	Cell Wall and Capsule	Capsular and extracellular polysacchrides	Colanic_acid_biosynthesis	Lipopolysaccharide biosynthesis protein WzxC	0.0492412	0.0631114	0.069025	0.0540995	0.0824119	0.0744602
455	SEED	Cell Wall and Capsule	Cell wall of Mycobacteria	linker_unit-arabinogalactan_synthesis	UDP-galactopyranose mutase (EC 5.4.99.9)	0.0761001	0.0694225	0.0632729	0.0781438	0.0549413	0.0496401
456	SEED	Cell Wall and Capsule	Capsular and extracellular polysacchrides	Sialic_Acid_Metabolism	N-acylglucosamine 2-epimerase (EC 5.1.3.8)	0.0805766	0.0946671	0.0517688	0.0721327	0.041206	0.0310251
457	SEED	Cell Wall and Capsule	Gram-Negative cell wall components	KDO2-Lipid_A_biosynthesis	Acyl-[acyl-carrier-protein]--UDP-N-acetylglucosamine O-acyltransferase (EC 2.3.1.129)	0.0358118	0.0378668	0.0862813	0.0300553	0.0549413	0.11169
458	SEED	Cell Wall and Capsule	Capsular and extracellular polysacchrides	Rhamnose_containing_glycans	Teichoic acid export ATP-binding protein TagH (EC 3.6.3.40)	0.0626707	0.0504891	0.0575209	0.0601106	0.0824119	0.0248201
459	SEED	Cell Wall and Capsule	Capsular and extracellular polysacchrides	Colanic_acid_biosynthesis	Colanic acid biosynthesis glycosyl transferase WcaE	0.116388	0.0820448	0.0287604	0.0300553	0.041206	0.0372301
460	SEED	Cell Wall and Capsule	Capsular and extracellular polysacchrides	Rhamnose_containing_glycans	Alpha-D-GlcNAc alpha-2-L-rhamnosyltransferase (EC 2.4.1.-)	0.0358118	0.0252446	0.0977854	0.0601106	0.041206	0.0744602
461	SEED	Cell Wall and Capsule	Gram-Negative cell wall components	KDO2-Lipid_A_biosynthesis	UDP-3-O-[3-hydroxymyristoyl] glucosamine N-acyltransferase (EC 2.3.1.-)	0.0671471	0.0883559	0.0287604	0.0240442	0.020603	0.0992802
462	SEED	Cell Wall and Capsule	Capsular and extracellular polysacchrides	Capsular_heptose_biosynthesis	GDP-L-fucose synthetase (EC 1.1.1.271)	0.0537177	0.0504891	0.0747771	0.0540995	0.0343383	0.0558451
463	SEED	Cell Wall and Capsule	Gram-Negative cell wall components	KDO2-Lipid_A_biosynthesis	Lipid-A-disaccharide synthase (EC 2.4.1.182)	0.0492412	0.0189334	0.0862813	0.0300553	0.0549413	0.0806652
464	SEED	Cell Wall and Capsule	Capsular and extracellular polysacchrides	Capsular_heptose_biosynthesis	GDP-mannose 6-dehydratase (EC 4.2.1.47)	0.0761001	0.0315557	0.0230083	0.102188	0.0274706	0.0434351
465	SEED	Cell Wall and Capsule	Gram-Positive cell wall components	Teichoic_and_lipoteichoic_acids_biosynthesis	CDP-glycerol:poly(glycerophosphate) glycerophosphotransferase (EC 2.7.8.12)	0.0984825	0.0883559	0.0230083	0.0601106	0.0137353	0.00620501
466	SEED	Cell Wall and Capsule	Gram-Negative cell wall components	KDO2-Lipid_A_biosynthesis	3-deoxy-manno-octulosonate cytidylyltransferase (EC 2.7.7.38)	0.0716236	0.0631114	0.0402646	0.0360664	0.020603	0.0558451
467	SEED	Cell Wall and Capsule	Capsular and extracellular polysacchrides	CMP-N-acetylneuraminate_Biosynthesis	N-acetylneuraminate synthase (EC 2.5.1.56)	0.0492412	0.0820448	0.0115042	0.0420774	0.0343383	0.0620501
468	SEED	Cell Wall and Capsule	Gram-Negative cell wall components	KDO2-Lipid_A_biosynthesis	Arabinose 5-phosphate isomerase (EC 5.3.1.13)	0.0358118	0.0378668	0.0747771	0.0240442	0.041206	0.0620501
469	SEED	Cell Wall and Capsule	Capsular and extracellular polysacchrides	dTDP-rhamnose_synthesis	Glucose-1-phosphate cytidylyltransferase (EC 2.7.7.33)	0.0402883	0.0694225	0.069025	0.0240442	0.0274706	0.0434351
470	SEED	Cell Wall and Capsule	Gram-Negative cell wall components	KDO2-Lipid_A_biosynthesis	O-antigen flippase Wzx	0.0671471	0.0694225	0.0287604	0.0480885	0.0137353	0.0372301
471	SEED	Cell Wall and Capsule	Capsular and extracellular polysacchrides	Rhamnose_containing_glycans	Glycerol-3-phosphate cytidylyltransferase (EC 2.7.7.39)	0.0447648	0.0315557	0.0460167	0.0721327	0.041206	0.0248201
472	SEED	Cell Wall and Capsule	YjeE	COG3178: Predicted phosphotransferase related to Ser/Thr protein kinases	COG3178: Predicted phosphotransferase related to Ser/Thr protein kinases4	0.0179059	0.0378668	0.0345125	0.0480885	0.0343383	0.0868702
473	SEED	Cell Wall and Capsule	Gram-Positive cell wall components	Teichoic_and_lipoteichoic_acids_biosynthesis	Poly(glycerol-phosphate) alpha-glucosyltransferase (EC 2.4.1.52)	0.0492412	0.044178	0.0345125	0.0601106	0.020603	0.0310251
474	SEED	Cell Wall and Capsule	Gram-Positive cell wall components	Teichoic_and_lipoteichoic_acids_biosynthesis	Teichoic acid translocation permease protein TagG	0.0223824	0.0378668	0.0230083	0.0300553	0.0686766	0.0434351
475	SEED	Cell Wall and Capsule	Gram-Negative cell wall components	KDO2-Lipid_A_biosynthesis	Tetraacyldisaccharide 4'-kinase (EC 2.7.1.130)	0.0358118	0.0126223	0.0287604	0.0300553	0.0686766	0.0434351
476	SEED	Cell Wall and Capsule	Gram-Negative cell wall components	Lipid_A-Ara4N_pathway_(_Polymyxin_resistance_)	Polymyxin resistance protein ArnT, undecaprenyl phosphate-alpha-L-Ara4N transferase	0.0134294	0.0504891	0.0402646	0.0120221	0.0343383	0.0682552
477	SEED	Cell Wall and Capsule	Gram-Negative cell wall components	KDO2-Lipid_A_biosynthesis	2-Keto-3-deoxy-D-manno-octulosonate-8-phosphate synthase (EC 2.5.1.55)	0.0447648	0.0189334	0.0632729	0.0120221	0.041206	0.0372301
478	SEED	Cell Wall and Capsule	YjeE	ATPase YjeE, predicted to have essential role in cell wall biosynthesis	ATPase YjeE, predicted to have essential role in cell wall biosynthesis	0.0223824	0.0378668	0.0172563	0.0420774	0.0549413	0.0372301
479	SEED	Cell Wall and Capsule	Cell wall of Mycobacteria	mycolic_acid_synthesis	acyl-CoA synthetase	0.0537177	0	0.0287604	0.0480885	0.0549413	0.0248201
480	SEED	Cell Wall and Capsule	Gram-Positive cell wall components	Teichoic_and_lipoteichoic_acids_biosynthesis	N-acetylmannosaminyltransferase (EC 2.4.1.187)	0.0581942	0.0315557	0.0172563	0.0420774	0.0480736	0.01241
481	SEED	Cell Wall and Capsule	Capsular and extracellular polysacchrides	Sialic_Acid_Metabolism	N-acetylneuraminate lyase (EC 4.1.3.3)	0.0313353	0.0315557	0.0402646	0.0360664	0.041206	0.018615
482	SEED	Cell Wall and Capsule	Gram-Negative cell wall components	KDO2-Lipid_A_biosynthesis	Lipid A biosynthesis lauroyl acyltransferase (EC 2.3.1.-)	0.0134294	0.00631114	0.069025	0.0240442	0.0343383	0.0434351
483	SEED	Cell Wall and Capsule	Capsular and extracellular polysacchrides	Serotype_determining_Capsular_polysaccharide_biosynthesis_in_Staphylococcus	Capsular polysaccharide synthesis enzyme Cap5F	0.0179059	0.0252446	0.0402646	0.0480885	0.020603	0.0372301
484	SEED	Cell Wall and Capsule	Gram-Negative cell wall components	LOS_core_oligosaccharide_biosynthesis	Beta-4-galactosyltransferase	0.0447648	0.044178	0.0172563	0.0360664	0.0274706	0.018615
485	SEED	Cell Wall and Capsule	Capsular and extracellular polysacchrides	Sialic_Acid_Metabolism	TRAP-type transport system, periplasmic component, predicted N-acetylneuraminate-binding protein	0.0537177	0.0568003	0.0230083	0.0120221	0.0343383	0.00620501
486	SEED	Cell Wall and Capsule	Gram-Negative cell wall components	KDO2-Lipid_A_biosynthesis	3-deoxy-D-manno-octulosonate 8-phosphate phosphatase (EC 3.1.3.45)	0.0268589	0.0252446	0.0402646	0.0180332	0.0480736	0.0248201
487	SEED	Cell Wall and Capsule	Capsular and extracellular polysacchrides	Sialic_Acid_Metabolism	TRAP-type transport system, large permease component, predicted N-acetylneuraminate transporter	0.0402883	0.0820448	0.0230083	0.0240442	0.00686766	0.00620501
488	SEED	Cell Wall and Capsule	Gram-Negative cell wall components	KDO2-Lipid_A_biosynthesis	3-deoxy-D-manno-octulosonic-acid transferase (EC 2.-.-.-)	0.0268589	0.0189334	0.0402646	0.0180332	0.0274706	0.0496401
489	SEED	Cell Wall and Capsule	Capsular and extracellular polysacchrides	Sialic_Acid_Metabolism	Sialic acid utilization regulator, RpiR family	0.0268589	0.044178	0.0402646	0.0240442	0.00686766	0.0310251
490	SEED	Cell Wall and Capsule	Capsular and extracellular polysacchrides	dTDP-rhamnose_synthesis	dTDP-Rha:A-D-GlcNAc-diphosphoryl polyprenol, A-3-L-rhamnosyl transferase WbbL	0.0581942	0	0.0172563	0.0420774	0.020603	0.0248201
491	SEED	Cell Wall and Capsule	Gram-Negative cell wall components	Lipid_A-Ara4N_pathway_(_Polymyxin_resistance_)	Polymyxin resistance protein ArnC, glycosyl transferase (EC 2.4.-.-)	0.0626707	0.0252446	0.00575209	0.0420774	0.0137353	0.01241
492	SEED	Cell Wall and Capsule	Peptidoglycan_Biosynthesis	Glucosamine-1-phosphate N-acetyltransferase (EC 2.3.1.157)	Glucosamine-1-phosphate N-acetyltransferase (EC 2.3.1.157)	0.0223824	0.0315557	0.0287604	0.0180332	0	0.0558451
493	SEED	Cell Wall and Capsule	Gram-Positive cell wall components	Teichoic_and_lipoteichoic_acids_biosynthesis	Regulation of D-alanyl-lipoteichoic acid biosynthesis, DltR	0.0268589	0.0378668	0.0402646	0.0180332	0.0137353	0.018615
494	SEED	Cell Wall and Capsule	Gram-Positive cell wall components	Teichoic_and_lipoteichoic_acids_biosynthesis	Minor teichoic acid biosynthesis protein GgaB	0.0134294	0.0189334	0.0460167	0.0360664	0.00686766	0.018615
495	SEED	Cell Wall and Capsule	Gram-Negative cell wall components	KDO2-Lipid_A_biosynthesis	UDP-3-diacylglucosamine hydrolase (EC 3.6.1.-)	0.0268589	0.0126223	0.0230083	0.0240442	0.0137353	0.0372301
496	SEED	Cell Wall and Capsule	Capsular and extracellular polysacchrides	Capsular_heptose_biosynthesis	D-glycero-D-manno-heptose 1-phosphate guanosyltransferase	0.0268589	0.044178	0	0.0180332	0.0343383	0.01241
497	SEED	Cell Wall and Capsule	Gram-Positive cell wall components	Teichoic_and_lipoteichoic_acids_biosynthesis	Putative CDP-glycerol:glycerophosphate glycerophosphotransferase (EC 2.7.8.-)	0.0134294	0.00631114	0.0460167	0.0240442	0.020603	0.0248201
498	SEED	Cell Wall and Capsule	Gram-Positive cell wall components	D-Alanyl_Lipoteichoic_Acid_Biosynthesis	D-alanine--poly(phosphoribitol) ligase subunit 1 (EC 6.1.1.13)	0.0134294	0.0315557	0.0287604	0.0180332	0.00686766	0.0310251
499	SEED	Cell Wall and Capsule	Gram-Negative cell wall components	Lipid_A_modifications	UPF0141 membrane protein YijP possibly required for phosphoethanolamine modification of lipopolysaccharide	0.00895295	0	0.0460167	0.0180332	0.020603	0.0310251
500	SEED	Cell Wall and Capsule	Capsular and extracellular polysacchrides	Sialic_Acid_Metabolism	Predicted sialic acid transporter	0.0134294	0.00631114	0.0287604	0.0180332	0.0137353	0.0434351
501	SEED	Cell Wall and Capsule	Capsular and extracellular polysacchrides	Serotype_determining_Capsular_polysaccharide_biosynthesis_in_Staphylococcus	Capsular polysaccharide synthesis enzyme Cap5E	0.00447648	0.0315557	0.0345125	0.0120221	0.0137353	0.01241
502	SEED	Cell Wall and Capsule	Capsular and extracellular polysacchrides	Capsular_heptose_biosynthesis	Phosphoheptose isomerase (EC 5.3.1.-)	0.0492412	0.0126223	0	0	0.0137353	0.0310251
503	SEED	Cell Wall and Capsule	Capsular and extracellular polysacchrides	Rhamnose_containing_glycans	Alpha-L-Rha alpha-3-L-rhamnosyltransferase (EC 2.4.1.-)	0.00447648	0.044178	0.0115042	0.0120221	0.020603	0.01241
504	SEED	Cell Wall and Capsule	Capsular and extracellular polysacchrides	Phosphorylcholine_incorporation_in_LPS	Choline kinase (EC 2.7.1.32)	0.0179059	0.0252446	0.0172563	0.0240442	0.020603	0
505	SEED	Cell Wall and Capsule	Gram-Negative cell wall components	KDO2-Lipid_A_biosynthesis	Predicted hydrolase of the metallo-beta-lactamase superfamily, clustered with KDO2-Lipid A biosynthesis genes	0.0358118	0.0252446	0.0115042	0.0180332	0.00686766	0.00620501
506	SEED	Cell Wall and Capsule	Peptidoglycan_Biosynthesis	N-acetylglucosamine-1-phosphate uridyltransferase eukaryotic (EC 2.7.7.23)	N-acetylglucosamine-1-phosphate uridyltransferase eukaryotic (EC 2.7.7.23)	0.0268589	0.0315557	0	0.0420774	0	0
507	SEED	Cell Wall and Capsule	Capsular and extracellular polysacchrides	O-Methyl_Phosphoramidate_Capsule_Modification_in_Campylobacter	Adenylylsulfate kinase (EC 2.7.1.25)	0.0179059	0.0126223	0.0230083	0.0300553	0	0.01241
508	SEED	Cell Wall and Capsule	Capsular and extracellular polysacchrides	Sialic_Acid_Metabolism	ABC transporter, predicted N-acetylneuraminate transport system permease protein 1	0.00895295	0.0315557	0.00575209	0.0300553	0.00686766	0.01241
509	SEED	Cell Wall and Capsule	Capsular and extracellular polysacchrides	Rhamnose_containing_glycans	putative polysialic acid transport protein	0.00895295	0.00631114	0	0.00601106	0.020603	0.0496401
510	SEED	Cell Wall and Capsule	Capsular and extracellular polysacchrides	Sialic_Acid_Metabolism	N-acetylmannosamine kinase (EC 2.7.1.60)	0.0134294	0.0252446	0.0172563	0.00601106	0.0137353	0.01241
511	SEED	Cell Wall and Capsule	Gram-Positive cell wall components	Teichoic_and_lipoteichoic_acids_biosynthesis	Glycosyl transferase involved in teichoic acid biosynthesis	0.00447648	0.0126223	0.0287604	0.0120221	0.0137353	0.01241
512	SEED	Cell Wall and Capsule	Gram-Positive cell wall components	Teichuronic_acid_biosynthesis	Putative N-acetylgalactosaminyl-diphosphoundecaprenol glucuronosyltransferase	0.0134294	0.0189334	0	0.0180332	0.020603	0.01241
513	SEED	Cell Wall and Capsule	Capsular and extracellular polysacchrides	Capsular_heptose_biosynthesis	Capsular polysaccharide biosynthesis heptosyltransferase HddD	0.0134294	0.0694225	0	0	0	0
514	SEED	Cell Wall and Capsule	Capsular and extracellular polysacchrides	Sialic_Acid_Metabolism	ABC transporter, predicted N-acetylneuraminate-binding protein	0.0179059	0.00631114	0.0172563	0.00601106	0.020603	0.01241
515	SEED	Cell Wall and Capsule	Capsular and extracellular polysacchrides	Capsular_heptose_biosynthesis	D,D-heptose 7-phosphate kinase	0.0268589	0.0126223	0.00575209	0	0.0274706	0.00620501
516	SEED	Cell Wall and Capsule	Gram-Negative cell wall components	LOS_core_oligosaccharide_biosynthesis	UDP-galactose:(galactosyl) LPS alpha2-galactosyltransferase WaaW (EC 2.4.1.-)	0.00447648	0.0126223	0.0172563	0.0180332	0.0137353	0.01241
517	SEED	Cell Wall and Capsule	Gram-Positive cell wall components	Teichoic_and_lipoteichoic_acids_biosynthesis	CDP-glycerol: N-acetyl-beta-D-mannosaminyl-4-N-acetyl-D-glucosaminyldiphosphoundecaprenyl glycerophosphotransferase	0.00895295	0.0315557	0	0	0.00686766	0.0310251
518	SEED	Cell Wall and Capsule	Gram-Negative cell wall components	LOS_core_oligosaccharide_biosynthesis	Putative two-domain glycosyltransferase	0.00895295	0.00631114	0	0.00601106	0.0343383	0.018615
519	SEED	Cell Wall and Capsule	Capsular and extracellular polysacchrides	Sialic_Acid_Metabolism	ABC transporter, predicted N-acetylneuraminate transport system permease protein 2	0.0313353	0	0	0.0300553	0.00686766	0
520	SEED	Cell Wall and Capsule	Capsular and extracellular polysacchrides	Alginate_metabolism	Pectin degradation protein KdgF	0.0223824	0.0189334	0	0.00601106	0.020603	0
521	SEED	Cell Wall and Capsule	Capsular and extracellular polysacchrides	Rhamnose_containing_glycans	Heteropolysaccharide repeat unit export protein	0.0358118	0.0126223	0.0172563	0	0	0
522	SEED	Cell Wall and Capsule	Gram-Positive cell wall components	Teichoic_and_lipoteichoic_acids_biosynthesis	Teichoic acid biosynthesis protein	0.0134294	0.0126223	0	0.0240442	0.0137353	0
523	SEED	Cell Wall and Capsule	Gram-Negative cell wall components	LOS_core_oligosaccharide_biosynthesis	D-glycero-beta-D-manno-heptose 7-phosphate kinase	0.00895295	0.00631114	0.0172563	0.0180332	0.00686766	0.00620501
524	SEED	Clustering-based subsystems	Bacterial_Cell_Division	Cell division protein FtsH (EC 3.4.24.-)	Cell division protein FtsH (EC 3.4.24.-)	0.273065	0.239823	0.270348	0.252465	0.192294	0.17374
525	SEED	Clustering-based subsystems	NusA-TFII_Cluster	Translation initiation factor 2	Translation initiation factor	0.223824	0.157778	0.207075	0.22842	0.20603	0.235791
526	SEED	Clustering-based subsystems	Conserved_gene_cluster_associated_with_Met-tRNA_formyltransferase	Trk system potassium uptake protein TrkA	Trk system potassium uptake protein TrkA	0.179059	0.132534	0.16681	0.156288	0.20603	0.248201
527	SEED	Clustering-based subsystems	Bacterial_Cell_Division	Cell division protein FtsK	Cell division protein FtsK	0.192488	0.151467	0.155306	0.16831	0.137353	0.18615
528	SEED	Clustering-based subsystems	Bacterial_Cell_Division	Cell division transporter, ATP-binding protein FtsE (TC 3.A.5.1.1)	Cell division transporter, ATP-binding protein FtsE (TC 3.A.5.1.1)	0.156677	0.239823	0.13805	0.150277	0.137353	0.142715
529	SEED	Clustering-based subsystems	Conserved_gene_cluster_associated_with_Met-tRNA_formyltransferase	Helicase PriA essential for oriC/DnaA-independent DNA replication	Helicase PriA essential for oriC/DnaA-independent DNA replication	0.134294	0.119912	0.189819	0.210387	0.137353	0.16133
530	SEED	Clustering-based subsystems	Bacterial_Cell_Division	Cell division trigger factor (EC 5.2.1.8)	Cell division trigger factor (EC 5.2.1.8)	0.210394	0.119912	0.115042	0.150277	0.157956	0.0620501
531	SEED	Clustering-based subsystems	Clustering-based subsystems.1	CBSS-262719.3.peg.410	Adenylosuccinate synthetase (EC 6.3.4.4)	0.134294	0.0631114	0.201323	0.138254	0.144221	0.0992802
532	SEED	Clustering-based subsystems	LMPTP_YwlE_cluster	Peptide chain release factor 1	Peptide chain release factor	0.085053	0.107289	0.126546	0.11421	0.20603	0.117895
533	SEED	Clustering-based subsystems	Clustering-based subsystems.1	CBSS-262719.3.peg.410	Phosphoesterase, DHH family protein	0.094006	0.132534	0.13805	0.144265	0.0892796	0.142715
534	SEED	Clustering-based subsystems	Conserved_gene_cluster_associated_with_Met-tRNA_formyltransferase	FIG134348: essential endopeptidase	FIG134348: essential endopeptidase	0.0805766	0.0820448	0.13805	0.174321	0.11675	0.130305
535	SEED	Clustering-based subsystems	Bacterial_RNA-metabolizing_Zn-dependent_hydrolases	Zn-dependent hydrolase, RNA-metabolising, CPSF 100 kDa analog	Zn-dependent hydrolase, RNA-metabolising, CPSF 100 kDa analog	0.111912	0.16409	0.115042	0.11421	0.0549413	0.130305
536	SEED	Clustering-based subsystems	Bacterial_Cell_Division	Cell division protein FtsW	Cell division protein FtsW	0.116388	0.145156	0.120794	0.102188	0.0892796	0.0992802
537	SEED	Clustering-based subsystems	Bacterial_Cell_Division	S-adenosyl-methyltransferase MraW (EC 2.1.1.-)	S-adenosyl-methyltransferase MraW (EC 2.1.1.-)	0.0895295	0.145156	0.0920334	0.11421	0.103015	0.117895
538	SEED	Clustering-based subsystems	Bacterial_Cell_Division	Cell division protein FtsX	Cell division protein FtsX	0.107435	0.132534	0.0977854	0.0901659	0.0549413	0.0992802
539	SEED	Clustering-based subsystems	Conserved_gene_cluster_associated_with_Met-tRNA_formyltransferase	Serine/threonine protein kinase PrkC, regulator of stationary phase	Serine/threonine protein kinase PrkC, regulator of stationary phase	0.120865	0.0504891	0.0747771	0.108199	0.0892796	0.0868702
540	SEED	Clustering-based subsystems	Clustering-based subsystems.1	CBSS-262719.3.peg.410	Replicative DNA helicase (EC 3.6.1.-) [SA14-24]	0.0984825	0.113601	0.0862813	0.0420774	0.0618089	0.11169
541	SEED	Clustering-based subsystems	Conserved_gene_cluster_associated_with_Met-tRNA_formyltransferase	Ribosomal RNA large subunit methyltransferase N (EC 2.1.1.-)	Ribosomal RNA large subunit methyltransferase N (EC 2.1.1.-)	0.0895295	0.0883559	0.069025	0.0901659	0.0961472	0.0806652
542	SEED	Clustering-based subsystems	Conserved_gene_cluster_associated_with_Met-tRNA_formyltransferase	Peptide deformylase (EC 3.5.1.88)	Peptide deformylase (EC 3.5.1.88)	0.0537177	0.0694225	0.10929	0.0901659	0.0480736	0.13651
543	SEED	Clustering-based subsystems	Bacterial_Cell_Division	Rod shape-determining protein MreB	Rod shape-determining protein MreB	0.0626707	0.0315557	0.0920334	0.0480885	0.109883	0.130305
544	SEED	Clustering-based subsystems	Bacterial_Cell_Division	Cell division protein FtsA	Cell division protein FtsA	0.094006	0.0378668	0.0460167	0.0420774	0.178559	0.01241
545	SEED	Clustering-based subsystems	Conserved_gene_cluster_associated_with_Met-tRNA_formyltransferase	Protein serine/threonine phosphatase PrpC, regulation of stationary phase	Protein serine/threonine phosphatase PrpC, regulation of stationary phase	0.094006	0.0820448	0.0632729	0.0300553	0.0480736	0.0558451
546	SEED	Clustering-based subsystems	Conserved_gene_cluster_associated_with_Met-tRNA_formyltransferase	Rossmann fold nucleotide-binding protein Smf possibly involved in DNA uptake	Rossmann fold nucleotide-binding protein Smf possibly involved in DNA uptake	0.0447648	0.0504891	0.0460167	0.0781438	0.0343383	0.0620501
547	SEED	Clustering-based subsystems	Conserved_gene_cluster_associated_with_Met-tRNA_formyltransferase	Ribosomal RNA small subunit methyltransferase B (EC 2.1.1.-)	Ribosomal RNA small subunit methyltransferase B (EC 2.1.1.-)	0.0761001	0.0315557	0.0632729	0.0540995	0.0274706	0.0620501
548	SEED	Clustering-based subsystems	Conserved_gene_cluster_associated_with_Met-tRNA_formyltransferase	tRNA:m(5)U-54 MTase gid	tRNA:m(5)U-54 MTase gid	0.0626707	0.0315557	0.0632729	0.0300553	0.0480736	0.0682552
549	SEED	Clustering-based subsystems	Conserved_gene_cluster_associated_with_Met-tRNA_formyltransferase	Cytochrome d ubiquinol oxidase subunit II (EC 1.10.3.-)	Cytochrome d ubiquinol oxidase subunit II (EC 1.10.3.-)	0.0492412	0.0189334	0.103538	0.0360664	0.041206	0.0372301
550	SEED	Clustering-based subsystems	Bacterial_Cell_Division	Rod shape-determining protein MreC	Rod shape-determining protein MreC	0.0537177	0.0568003	0.0345125	0.0420774	0.0343383	0.0620501
551	SEED	Clustering-based subsystems	Bacterial_Cell_Division	Cell division protein MraZ	Cell division protein MraZ	0.085053	0.0946671	0.0287604	0.0300553	0.0137353	0.018615
552	SEED	Clustering-based subsystems	LMPTP_YfkJ_cluster	Low molecular weight protein tyrosine phosphatase (EC 3.1.3.48)	Low molecular weight protein tyrosine phosphatase (EC 3.1.3.48)	0.0581942	0.0568003	0.0230083	0.0420774	0.0618089	0.0248201
553	SEED	Clustering-based subsystems	Bacterial_RNA-metabolizing_Zn-dependent_hydrolases	Metallo-beta-lactamase family protein, RNA-specific	Metallo-beta-lactamase family protein, RNA-specific	0.0626707	0.044178	0.0517688	0.0480885	0.041206	0.018615
554	SEED	Clustering-based subsystems	Carbohydrates.1	Unknown_sugar_utilization_(cluster_yphABCDEFG)	Uncharacterized protein YphG, TPR-domain containing	0.0268589	0.0504891	0.0287604	0.0480885	0.0961472	0.01241
555	SEED	Clustering-based subsystems	Lysine, threonine, methionine, and cysteine	YeiH	Putative membrane protein YeiH	0.0313353	0.0189334	0.0402646	0.096177	0.020603	0.0496401
556	SEED	Clustering-based subsystems	Conserved_gene_cluster_associated_with_Met-tRNA_formyltransferase	50S ribosomal subunit maturation GTPase RbgA (B. subtilis YlqF)	50S ribosomal subunit maturation GTPase RbgA (B. subtilis YlqF)	0.085053	0.0315557	0.0517688	0.0240442	0.020603	0.0434351
557	SEED	Clustering-based subsystems	NusA-TFII_Cluster	Ribosome-binding factor A	Ribosome-binding factor A	0.0492412	0.0568003	0.0517688	0.0120221	0.041206	0.0310251
558	SEED	Clustering-based subsystems	Bacterial_Cell_Division	Septum formation protein Maf	Septum formation protein Maf	0.0492412	0.044178	0.0230083	0.0480885	0.0343383	0.0372301
559	SEED	Clustering-based subsystems	Bacterial_RNA-metabolizing_Zn-dependent_hydrolases	Hydrolase (HAD superfamily) in cluster with DUF1447	Hydrolase (HAD superfamily) in cluster with DUF144	0.0537177	0.044178	0.0345125	0.0420774	0.0274706	0.0310251
560	SEED	Clustering-based subsystems	Lysine, threonine, methionine, and cysteine	YeiH	LysR family transcriptional regulator YeiE	0.0268589	0.0189334	0.0115042	0.0540995	0.020603	0.0558451
561	SEED	Clustering-based subsystems	Bacterial_Cell_Division	Rod shape-determining protein MreD	Rod shape-determining protein MreD	0.00447648	0.0378668	0	0.0360664	0.0480736	0.018615
562	SEED	Clustering-based subsystems	Bacterial_Cell_Division	Cell division protein FtsQ	Cell division protein FtsQ	0.0313353	0.0315557	0.0115042	0.0240442	0.020603	0.018615
563	SEED	Clustering-based subsystems	Bacterial_Cell_Division	Chromosome partitioning protein ParA	Chromosome partitioning protein ParA	0.0402883	0.00631114	0.0517688	0.0240442	0.00686766	0.00620501
564	SEED	Clustering-based subsystems	Conserved_gene_cluster_associated_with_Met-tRNA_formyltransferase	GTP-sensing transcriptional pleiotropic repressor codY	GTP-sensing transcriptional pleiotropic repressor codY	0.0134294	0.0252446	0.0115042	0.0300553	0.00686766	0.00620501
565	SEED	Clustering-based subsystems	LMPTP_YwlE_cluster	Hypothetical protein ywlG	Hypothetical protein ywlG	0.0134294	0.0252446	0.0287604	0.0120221	0	0.00620501
566	SEED	Clustering-based subsystems	CBSS-261594.1.peg.2640	Protein of unknown function DUF156	Protein of unknown function DUF15	0.00895295	0.0189334	0	0.0120221	0.020603	0.01241
567	SEED	Clustering-based subsystems	Type III secretion system related	CBSS-343509.6.peg.2644	COG0840: Methyl-accepting chemotaxis protein	0.0223824	0.0126223	0.0115042	0.0180332	0.00686766	0
568	SEED	Cofactors, Vitamins, Prosthetic Groups, Pigments	Riboflavin, FMN, FAD	Flavodoxin	Flavodoxin, 6 3 5 3 2 25	0.290971	0.239823	0.299108	0.216398	0.157956	0.155125
569	SEED	Cofactors, Vitamins, Prosthetic Groups, Pigments	NAD and NADP	NAD_and_NADP_cofactor_biosynthesis_global	Glutamine amidotransferase chain of NAD synthetase	0.16563	0.189334	0.195571	0.16831	0.157956	0.17374
570	SEED	Cofactors, Vitamins, Prosthetic Groups, Pigments	Folate and pterines	Folate_Biosynthesis	COG0488: ATPase components of ABC transporters with duplicated ATPase domains	0.156677	0.176712	0.172563	0.162299	0.144221	0.179945
571	SEED	Cofactors, Vitamins, Prosthetic Groups, Pigments	Thiamin_biosynthesis	Thiazole biosynthesis protein ThiH	Thiazole biosynthesis protein ThiH	0.0492412	0.0883559	0.149554	0.11421	0.103015	0.179945
572	SEED	Cofactors, Vitamins, Prosthetic Groups, Pigments	Tetrapyrroles	Experimental_tye	Sua5 YciO YrdC YwlC family protein	0.0895295	0.0883559	0.10929	0.16831	0.123618	0.0744602
573	SEED	Cofactors, Vitamins, Prosthetic Groups, Pigments	NAD and NADP	NAD_regulation	L-aspartate oxidase (EC 1.4.3.16)	0.0984825	0.0568003	0.103538	0.0661217	0.164824	0.117895
574	SEED	Cofactors, Vitamins, Prosthetic Groups, Pigments	Tetrapyrroles	Heme_and_Siroheme_Biosynthesis	Hypothetical radical SAM family enzyme, NOT coproporphyrinogen III oxidase, oxygen-independent	0.143247	0.107289	0.10929	0.0601106	0.0824119	0.0868702
575	SEED	Cofactors, Vitamins, Prosthetic Groups, Pigments	Tetrapyrroles	Coenzyme_B12_biosynthesis	Cobyrinic acid A,C-diamide synthase	0.129818	0.0883559	0.0517688	0.144265	0.0549413	0.0620501
576	SEED	Cofactors, Vitamins, Prosthetic Groups, Pigments	Thiamin_biosynthesis	Thiamin-regulated outer membrane receptor Omr1	Thiamin-regulated outer membrane receptor Omr	0.0626707	0.0378668	0.13805	0.0540995	0.130486	0.0930752
577	SEED	Cofactors, Vitamins, Prosthetic Groups, Pigments	Folate and pterines	Folate_Biosynthesis	ATPase component of general energizing module of ECF transporters	0.0761001	0.100978	0.0920334	0.102188	0.0892796	0.0496401
578	SEED	Cofactors, Vitamins, Prosthetic Groups, Pigments	Tetrapyrroles	Coenzyme_B12_biosynthesis	Cobyric acid synthase	0.0716236	0.0568003	0.0517688	0.162299	0.109883	0.0496401
579	SEED	Cofactors, Vitamins, Prosthetic Groups, Pigments	NAD and NADP	NAD_regulation	Nicotinate phosphoribosyltransferase (EC 2.4.2.11)	0.085053	0.126223	0.103538	0.0841548	0.020603	0.0682552
580	SEED	Cofactors, Vitamins, Prosthetic Groups, Pigments	Coenzyme A	Coenzyme_A_Biosynthesis	Ketol-acid reductoisomerase (EC 1.1.1.86)	0.120865	0.0694225	0.0747771	0.0781438	0.041206	0.0992802
581	SEED	Cofactors, Vitamins, Prosthetic Groups, Pigments	Biotin	Biotin_biosynthesis	8-amino-7-oxononanoate synthase (EC 2.3.1.47)	0.0895295	0.0568003	0.0632729	0.0781438	0.0961472	0.0992802
582	SEED	Cofactors, Vitamins, Prosthetic Groups, Pigments	Thiamin_biosynthesis	Thiamin biosynthesis protein ThiC	Thiamin biosynthesis protein ThiC	0.0537177	0.0504891	0.143802	0.0420774	0.0480736	0.13651
583	SEED	Cofactors, Vitamins, Prosthetic Groups, Pigments	Folate and pterines	Folate_Biosynthesis	Thymidylate synthase (EC 2.1.1.45)	0.0358118	0.0378668	0.10929	0.120221	0.11675	0.0434351
584	SEED	Cofactors, Vitamins, Prosthetic Groups, Pigments	Riboflavin, FMN, FAD	Riboflavin,_FMN_and_FAD_metabolism	4-dihydroxy-2-butanone 4-phosphate synthase	0.0671471	0.0757337	0.0920334	0.0601106	0.041206	0.11169
585	SEED	Cofactors, Vitamins, Prosthetic Groups, Pigments	Tetrapyrroles	Coenzyme_B12_biosynthesis	Predicted cobalt transporter in Bacteroides_Porphyromonas	0.0223824	0.044178	0.0460167	0.0781438	0.0755443	0.13651
586	SEED	Cofactors, Vitamins, Prosthetic Groups, Pigments	Biotin	Biotin_biosynthesis	Adenosylmethionine-8-amino-7-oxononanoate aminotransferase (EC 2.6.1.62)	0.0313353	0.044178	0.0977854	0.0420774	0.157956	0.0248201
587	SEED	Cofactors, Vitamins, Prosthetic Groups, Pigments	Folate and pterines	Folate_Biosynthesis	Methionyl-tRNA formyltransferase (EC 2.1.2.9)	0.0805766	0.0568003	0.0747771	0.0480885	0.0755443	0.0558451
588	SEED	Cofactors, Vitamins, Prosthetic Groups, Pigments	Folate and pterines	Folate_Biosynthesis	Nucleoside triphosphate pyrophosphohydrolase MazG	0.0537177	0.0631114	0.0575209	0.0781438	0.0755443	0.0558451
589	SEED	Cofactors, Vitamins, Prosthetic Groups, Pigments	NAD and NADP	NAD_and_NADP_cofactor_biosynthesis_global	NAD kinase (EC 2.7.1.23)	0.0581942	0.0946671	0.0575209	0.0240442	0.0618089	0.0806652
590	SEED	Cofactors, Vitamins, Prosthetic Groups, Pigments	Coenzyme A	Coenzyme_A_Biosynthesis	Pantoate--beta-alanine ligase (EC 6.3.2.1)	0.0581942	0.0694225	0.0747771	0.0480885	0.0549413	0.0682552
591	SEED	Cofactors, Vitamins, Prosthetic Groups, Pigments	Quinone cofactors	Menaquinone_and_Phylloquinone_Biosynthesis	2-succinyl-5-enolpyruvyl-6-hydroxy-3-cyclohexene-1-carboxylic-acid synthase (EC 2.2.1.9)	0.0492412	0.0315557	0.0747771	0.0540995	0.0686766	0.0930752
592	SEED	Cofactors, Vitamins, Prosthetic Groups, Pigments	Thiamin_biosynthesis	Thiamin-phosphate pyrophosphorylase (EC 2.5.1.3)	Thiamin-phosphate pyrophosphorylase (EC 2.5.1.3)	0.0402883	0.0820448	0.0517688	0.0661217	0.0274706	0.0930752
593	SEED	Cofactors, Vitamins, Prosthetic Groups, Pigments	NAD and NADP	NAD_regulation	Quinolinate phosphoribosyltransferase [decarboxylating] (EC 2.4.2.19)	0.0402883	0.0378668	0.069025	0.0661217	0.0480736	0.0992802
594	SEED	Cofactors, Vitamins, Prosthetic Groups, Pigments	NAD and NADP	NAD_regulation	Quinolinate synthetase (EC 4.1.99.-)	0.0895295	0.044178	0.0575209	0.0480885	0.0480736	0.0620501
595	SEED	Cofactors, Vitamins, Prosthetic Groups, Pigments	Folate and pterines	Pterin_biosynthesis	GTP cyclohydrolase I (EC 3.5.4.16) type 1	0.0537177	0.0820448	0.0402646	0.0661217	0.0274706	0.0558451
596	SEED	Cofactors, Vitamins, Prosthetic Groups, Pigments	Coenzyme A	Coenzyme_A_Biosynthesis	Pantothenate kinase type III, CoaX-like (EC 2.7.1.33)	0.0402883	0.0820448	0.0517688	0.0540995	0.0274706	0.0682552
597	SEED	Cofactors, Vitamins, Prosthetic Groups, Pigments	Thiamin_biosynthesis	Thiamine-monophosphate kinase (EC 2.7.4.16)	Thiamine-monophosphate kinase (EC 2.7.4.16)	0.0358118	0.0757337	0.00575209	0.0360664	0.103015	0.0620501
598	SEED	Cofactors, Vitamins, Prosthetic Groups, Pigments	Coenzyme A	Coenzyme_A_Biosynthesis	Phosphopantetheine adenylyltransferase (EC 2.7.7.3)	0.0223824	0.00631114	0.0920334	0.0901659	0.0549413	0.0434351
599	SEED	Cofactors, Vitamins, Prosthetic Groups, Pigments	Thiamin_biosynthesis	Phosphomethylpyrimidine kinase (EC 2.7.4.7)	Phosphomethylpyrimidine kinase (EC 2.7.4.7)	0.0313353	0.0189334	0.0862813	0.0240442	0.0892796	0.0558451
600	SEED	Cofactors, Vitamins, Prosthetic Groups, Pigments	Folate and pterines	Folate_Biosynthesis	Dihydropteroate synthase (EC 2.5.1.15)	0.0313353	0.044178	0.0632729	0.0661217	0.0480736	0.0496401
601	SEED	Cofactors, Vitamins, Prosthetic Groups, Pigments	Tetrapyrroles	Coenzyme_B12_biosynthesis	Vitamin B12 ABC transporter, permease component BtuC	0.0268589	0.0252446	0.0575209	0.0420774	0.0824119	0.0682552
602	SEED	Cofactors, Vitamins, Prosthetic Groups, Pigments	Folate and pterines	Folate_Biosynthesis	Thymidine kinase (EC 2.7.1.21)	0.0581942	0.0126223	0.0230083	0.0721327	0.0618089	0.0744602
603	SEED	Cofactors, Vitamins, Prosthetic Groups, Pigments	Tetrapyrroles	Coenzyme_B12_biosynthesis	Duplicated ATPase component CbrU of energizing module of predicted cobalamin ECF transporter	0.0223824	0.0189334	0.0460167	0.0540995	0.0343383	0.1241
604	SEED	Cofactors, Vitamins, Prosthetic Groups, Pigments	Pyridoxine	Pyridoxin_(Vitamin_B6)_Biosynthesis	Pyridoxal kinase (EC 2.7.1.35)	0.0223824	0.044178	0.069025	0.0601106	0.0480736	0.0496401
605	SEED	Cofactors, Vitamins, Prosthetic Groups, Pigments	NAD and NADP	NAD_and_NADP_cofactor_biosynthesis_global	ADP-ribose pyrophosphatase (EC 3.6.1.13)	0.0447648	0.0504891	0.0747771	0.0540995	0.0618089	0.00620501
606	SEED	Cofactors, Vitamins, Prosthetic Groups, Pigments	Tetrapyrroles	Heme_and_Siroheme_Biosynthesis	Putative coproporphyrinogen III oxidase of BS HemN-type, oxygen-independent (EC 1.3.99.22), in heat shock gene cluster	0.0895295	0.0568003	0.0402646	0.0180332	0.0549413	0.0310251
607	SEED	Cofactors, Vitamins, Prosthetic Groups, Pigments	Tetrapyrroles	Coenzyme_B12_biosynthesis	Vitamin B12 ABC transporter, B12-binding component BtuF	0.0402883	0.044178	0.0460167	0.0360664	0.0549413	0.0620501
608	SEED	Cofactors, Vitamins, Prosthetic Groups, Pigments	Riboflavin, FMN, FAD	Riboflavin,_FMN_and_FAD_metabolism	Riboflavin synthase alpha chain (EC 2.5.1.9)	0.0313353	0.0315557	0.0402646	0.0300553	0.103015	0.0434351
609	SEED	Cofactors, Vitamins, Prosthetic Groups, Pigments	Coenzyme A	Coenzyme_A_Biosynthesis	3-methyl-2-oxobutanoate hydroxymethyltransferase (EC 2.1.2.11)	0.0492412	0.0252446	0.0805292	0.0120221	0.0274706	0.0682552
610	SEED	Cofactors, Vitamins, Prosthetic Groups, Pigments	Tetrapyrroles	Heme_biosynthesis_orphans	Radical SAM domain heme biosynthesis protein	0.0402883	0.0883559	0.0115042	0.0480885	0.0480736	0.0248201
611	SEED	Cofactors, Vitamins, Prosthetic Groups, Pigments	Tetrapyrroles	Coenzyme_B12_biosynthesis	Alpha-ribazole-5'-phosphate phosphatase (EC 3.1.3.73)	0.0537177	0.0504891	0.0230083	0.0300553	0.0549413	0.0434351
612	SEED	Cofactors, Vitamins, Prosthetic Groups, Pigments	Coenzyme A	Coenzyme_A_Biosynthesis	Dephospho-CoA kinase (EC 2.7.1.24)	0.0447648	0.0315557	0.0287604	0.0420774	0.0686766	0.0372301
613	SEED	Cofactors, Vitamins, Prosthetic Groups, Pigments	Tetrapyrroles	Coenzyme_B12_biosynthesis	Cobalt-precorrin-3b C17-methyltransferase	0.0134294	0.0757337	0.0172563	0.0360664	0.0618089	0.0372301
614	SEED	Cofactors, Vitamins, Prosthetic Groups, Pigments	Folate and pterines	Folate_Biosynthesis	Dihydrofolate reductase (EC 1.5.1.3)	0.0447648	0.0631114	0.0345125	0.0300553	0.0343383	0.0310251
615	SEED	Cofactors, Vitamins, Prosthetic Groups, Pigments	Quinone cofactors	Menaquinone_and_Phylloquinone_Biosynthesis	Naphthoate synthase (EC 4.1.3.36)	0.0402883	0.00631114	0.0402646	0.0540995	0.00686766	0.0744602
616	SEED	Cofactors, Vitamins, Prosthetic Groups, Pigments	Coenzyme A	Coenzyme_A_Biosynthesis	2-dehydropantoate 2-reductase (EC 1.1.1.169)	0.0313353	0.0315557	0.0287604	0.0480885	0.041206	0.0372301
617	SEED	Cofactors, Vitamins, Prosthetic Groups, Pigments	Biotin	Biotin_biosynthesis	Dethiobiotin synthetase (EC 6.3.3.3)	0.0268589	0.00631114	0.0402646	0.0180332	0.041206	0.0806652
618	SEED	Cofactors, Vitamins, Prosthetic Groups, Pigments	Folate and pterines	Folate_Biosynthesis	Transmembrane component of general energizing module of ECF transporters	0.0358118	0.044178	0.0172563	0.0420774	0.0480736	0.0248201
619	SEED	Cofactors, Vitamins, Prosthetic Groups, Pigments	Biotin	Biotin_biosynthesis	Biotin synthase (EC 2.8.1.6)	0.0358118	0.0378668	0.0517688	0.0300553	0.0343383	0.018615
620	SEED	Cofactors, Vitamins, Prosthetic Groups, Pigments	Tetrapyrroles	Coenzyme_B12_biosynthesis	Cobalt-precorrin-6 synthase, anaerobic	0.0223824	0.044178	0.0115042	0.0360664	0.0343383	0.0558451
621	SEED	Cofactors, Vitamins, Prosthetic Groups, Pigments	Pyridoxine	Pyridoxin_(Vitamin_B6)_Biosynthesis	4-hydroxythreonine-4-phosphate dehydrogenase (EC 1.1.1.262)	0.0223824	0.0252446	0.0345125	0.0300553	0.0343383	0.0558451
622	SEED	Cofactors, Vitamins, Prosthetic Groups, Pigments	Tetrapyrroles	Coenzyme_B12_biosynthesis	Cob(I)alamin adenosyltransferase (EC 2.5.1.17)	0.0268589	0.0757337	0.0230083	0.0240442	0.020603	0.0310251
623	SEED	Cofactors, Vitamins, Prosthetic Groups, Pigments	Riboflavin, FMN, FAD	Riboflavin,_FMN_and_FAD_metabolism	Substrate-specific component RibU of riboflavin ECF transporter	0.0537177	0.0252446	0.0345125	0.0480885	0.020603	0.018615
624	SEED	Cofactors, Vitamins, Prosthetic Groups, Pigments	Tetrapyrroles	Coenzyme_B12_biosynthesis	L-threonine 3-O-phosphate decarboxylase (EC 4.1.1.81)	0.0179059	0.0504891	0.0230083	0.0540995	0.0549413	0
625	SEED	Cofactors, Vitamins, Prosthetic Groups, Pigments	Biotin	Biotin_biosynthesis	Biotin operon repressor	0.0223824	0.0315557	0.0460167	0.0240442	0.041206	0.0310251
626	SEED	Cofactors, Vitamins, Prosthetic Groups, Pigments	Thiamin_biosynthesis	Thiazole biosynthesis protein ThiG	Thiazole biosynthesis protein ThiG	0.0358118	0.0126223	0.0172563	0.0300553	0.0549413	0.0434351
627	SEED	Cofactors, Vitamins, Prosthetic Groups, Pigments	Biotin	Biotin_biosynthesis	Biotin synthesis protein bioC	0.0313353	0.0252446	0.0230083	0.0180332	0.0274706	0.0682552
628	SEED	Cofactors, Vitamins, Prosthetic Groups, Pigments	Tetrapyrroles	Coenzyme_B12_biosynthesis	Nicotinate-nucleotide--dimethylbenzimidazole phosphoribosyltransferase (EC 2.4.2.21)	0.0134294	0.044178	0.0230083	0.0180332	0.0618089	0.0310251
629	SEED	Cofactors, Vitamins, Prosthetic Groups, Pigments	Lipoic acid	Lipoic_acid_metabolism	Lipoate-protein ligase A	0.0134294	0.0252446	0.0172563	0.0420774	0.0343383	0.0558451
630	SEED	Cofactors, Vitamins, Prosthetic Groups, Pigments	Folate and pterines	Molybdenum_cofactor_biosynthesis	Molybdenum cofactor biosynthesis protein MoaA	0.0492412	0.044178	0.0230083	0.0360664	0.0343383	0
631	SEED	Cofactors, Vitamins, Prosthetic Groups, Pigments	Pyridoxine	Pyridoxin_(Vitamin_B6)_Biosynthesis	Predicted transcriptional regulator of pyridoxine metabolism	0.0358118	0.0189334	0.0287604	0.0240442	0.0480736	0.018615
632	SEED	Cofactors, Vitamins, Prosthetic Groups, Pigments	Tetrapyrroles	Experimental_tye	Glutamate-1-semialdehyde aminotransferase (EC 5.4.3.8)	0.0223824	0.0504891	0.0287604	0.0240442	0.0274706	0.018615
633	SEED	Cofactors, Vitamins, Prosthetic Groups, Pigments	Tetrapyrroles	Coenzyme_B12_biosynthesis	Cobalamin biosynthesis protein CbiG	0.0179059	0.00631114	0.00575209	0.0240442	0.0480736	0.0620501
634	SEED	Cofactors, Vitamins, Prosthetic Groups, Pigments	Tetrapyrroles	Coenzyme_B12_biosynthesis	Cobalamin synthase	0.0447648	0.0378668	0	0.00601106	0.0549413	0.018615
635	SEED	Cofactors, Vitamins, Prosthetic Groups, Pigments	Tetrapyrroles	Coenzyme_B12_biosynthesis	Vitamin B12 ABC transporter, ATPase component BtuD	0.0313353	0.0189334	0.0172563	0.0360664	0.041206	0.01241
636	SEED	Cofactors, Vitamins, Prosthetic Groups, Pigments	Folate and pterines	Folate_Biosynthesis	2-amino-4-hydroxy-6-hydroxymethyldihydropteridine pyrophosphokinase (EC 2.7.6.3)	0.0447648	0.0126223	0.0345125	0.0120221	0.020603	0.0310251
637	SEED	Cofactors, Vitamins, Prosthetic Groups, Pigments	Tetrapyrroles	Coenzyme_B12_biosynthesis	Adenosylcobinamide-phosphate synthase	0.0268589	0.00631114	0.0115042	0.0420774	0.041206	0.0248201
638	SEED	Cofactors, Vitamins, Prosthetic Groups, Pigments	Pyridoxine	Pyridoxin_(Vitamin_B6)_Biosynthesis	Pyridoxine 5'-phosphate synthase (EC 2.6.99.2)	0.0313353	0.0189334	0.0172563	0.0180332	0.0274706	0.0372301
639	SEED	Cofactors, Vitamins, Prosthetic Groups, Pigments	Quinone cofactors	Pyrroloquinoline_Quinone_biosynthesis	Microsomal dipeptidase (EC 3.4.13.19)	0.0134294	0.0378668	0.0287604	0.0300553	0	0.0372301
640	SEED	Cofactors, Vitamins, Prosthetic Groups, Pigments	NAD and NADP	NAD_regulation	Nicotinamidase (EC 3.5.1.19)	0.0358118	0.00631114	0.0402646	0.0120221	0.00686766	0.0434351
641	SEED	Cofactors, Vitamins, Prosthetic Groups, Pigments	Tetrapyrroles	Coenzyme_B12_biosynthesis	Sirohydrochlorin cobaltochelatase CbiK (EC 4.99.1.3)	0.0313353	0.044178	0	0.0120221	0.00686766	0.0496401
642	SEED	Cofactors, Vitamins, Prosthetic Groups, Pigments	Folate and pterines	Folate_Biosynthesis	Thymidylate synthase thyX (EC 2.1.1.-)	0.0313353	0.0252446	0.0115042	0.0180332	0.020603	0.0310251
643	SEED	Cofactors, Vitamins, Prosthetic Groups, Pigments	Folate and pterines	Folate_Biosynthesis	alternate gene name: yzbB	0.0223824	0.00631114	0.0172563	0.0240442	0.0274706	0.0372301
644	SEED	Cofactors, Vitamins, Prosthetic Groups, Pigments	Pyridoxine	Pyridoxin_(Vitamin_B6)_Biosynthesis	Erythronate-4-phosphate dehydrogenase (EC 1.1.1.290)	0.0223824	0	0.0287604	0	0.0274706	0.0558451
645	SEED	Cofactors, Vitamins, Prosthetic Groups, Pigments	Quinone cofactors	Menaquinone_and_Phylloquinone_Biosynthesis	4-dihydroxy-2-naphthoate octaprenyltransferase (EC 2.5.1.-)	0.0179059	0.00631114	0.0402646	0.0300553	0.00686766	0.0310251
646	SEED	Cofactors, Vitamins, Prosthetic Groups, Pigments	Biotin	Biotin_biosynthesis	Substrate-specific component BioY of biotin ECF transporter	0.0134294	0.0189334	0.0172563	0.0300553	0.0274706	0.0248201
647	SEED	Cofactors, Vitamins, Prosthetic Groups, Pigments	Biotin	Biotin_biosynthesis	Biotin-protein ligase (EC 6.3.4.15)	0.0179059	0.0126223	0.0115042	0.0420774	0.0274706	0.01241
648	SEED	Cofactors, Vitamins, Prosthetic Groups, Pigments	Quinone cofactors	Menaquinone_and_Phylloquinone_Biosynthesis	O-succinylbenzoic acid--CoA ligase (EC 6.2.1.26)	0.0134294	0	0.0230083	0.0180332	0.0274706	0.0372301
649	SEED	Cofactors, Vitamins, Prosthetic Groups, Pigments	NAD and NADP	NAD_regulation	Predicted nicotinate-regulated transporter BH3254	0.0358118	0.0315557	0.0115042	0.0300553	0	0
650	SEED	Cofactors, Vitamins, Prosthetic Groups, Pigments	Folate and pterines	p-Aminobenzoyl-Glutamate_Utilization	Catalyzes the cleavage of p-aminobenzoyl-glutamate to p-aminobenzoate and glutamate, subunit A	0.0313353	0.0189334	0.00575209	0.0300553	0.020603	0
651	SEED	Cofactors, Vitamins, Prosthetic Groups, Pigments	Coenzyme A	Coenzyme_A_Biosynthesis	Aspartate 1-decarboxylase (EC 4.1.1.11)	0.0179059	0.00631114	0.0517688	0.0180332	0.00686766	0
652	SEED	Cofactors, Vitamins, Prosthetic Groups, Pigments	Thiamin_biosynthesis	Sulfur carrier protein adenylyltransferase ThiF	Sulfur carrier protein adenylyltransferase ThiF	0.00895295	0.0189334	0.0115042	0.0180332	0.0274706	0.01241
653	SEED	Cofactors, Vitamins, Prosthetic Groups, Pigments	Lipoic acid	Lipoic_acid_metabolism	Lipoate synthase	0.0179059	0.00631114	0.0172563	0.0120221	0.020603	0.018615
654	SEED	Cofactors, Vitamins, Prosthetic Groups, Pigments	NAD and NADP	NAD_regulation	Nicotinate-nucleotide adenylyltransferase (EC 2.7.7.18)	0.0134294	0.0126223	0.0230083	0.0300553	0.00686766	0.00620501
655	SEED	Cofactors, Vitamins, Prosthetic Groups, Pigments	Riboflavin, FMN, FAD	Riboflavin,_FMN_and_FAD_metabolism	7-dimethyl-8-ribityllumazine synthase (EC 2.5.1.9)	0.0179059	0.0189334	0.0230083	0.0120221	0.0137353	0.00620501
656	SEED	Cofactors, Vitamins, Prosthetic Groups, Pigments	Tetrapyrroles	Experimental_tye	Porphobilinogen synthase (EC 4.2.1.24)	0.0134294	0.0504891	0.0115042	0	0.0137353	0
657	SEED	Cofactors, Vitamins, Prosthetic Groups, Pigments	Tetrapyrroles	Experimental_tye	Cytochrome c-type biogenesis protein CcdA (DsbD analog)	0.0134294	0.0252446	0.0172563	0.0180332	0.00686766	0.00620501
658	SEED	Cofactors, Vitamins, Prosthetic Groups, Pigments	Tetrapyrroles	Coenzyme_B12_biosynthesis	Cobalt-precorrin-4 C11-methyltransferase (EC 2.1.1.133)	0.00895295	0.0504891	0	0.0180332	0	0.00620501
659	SEED	Cofactors, Vitamins, Prosthetic Groups, Pigments	NAD and NADP	NAD_regulation	Hypothetical Nudix-like regulator	0.0134294	0.0126223	0.0230083	0.00601106	0.0137353	0.01241
660	SEED	Cofactors, Vitamins, Prosthetic Groups, Pigments	Quinone cofactors	Menaquinone_and_Phylloquinone_Biosynthesis	O-succinylbenzoate-CoA synthase (EC 4.2.1.-)	0.00447648	0.00631114	0.00575209	0.0240442	0.0137353	0.0248201
661	SEED	Cofactors, Vitamins, Prosthetic Groups, Pigments	Tetrapyrroles	Coenzyme_B12_biosynthesis	Adenosylcobinamide-phosphate guanylyltransferase (EC 2.7.7.62)	0.0268589	0.00631114	0	0.0120221	0.020603	0.01241
662	SEED	Cofactors, Vitamins, Prosthetic Groups, Pigments	Tetrapyrroles	Experimental_tye	Uroporphyrinogen-III methyltransferase (EC 2.1.1.107)	0.00895295	0.0252446	0.0115042	0.0300553	0	0
663	SEED	Cofactors, Vitamins, Prosthetic Groups, Pigments	Thiamin_biosynthesis	Hydroxymethylpyrimidine ABC transporter, transmembrane component	Hydroxymethylpyrimidine ABC transporter, transmembrane component,	0.0134294	0.0252446	0.0172563	0.0120221	0.00686766	0
664	SEED	Cofactors, Vitamins, Prosthetic Groups, Pigments	Pyridoxine	Pyridoxin_(Vitamin_B6)_Biosynthesis	Pyridoxine biosynthesis glutamine amidotransferase, synthase subunit (EC 2.4.2.-)	0.00895295	0.0189334	0.0345125	0.0120221	0	0
665	SEED	Cofactors, Vitamins, Prosthetic Groups, Pigments	Thiamin_biosynthesis	Thiamin pyrophosphokinase (EC 2.7.6.2)	Thiamin pyrophosphokinase (EC 2.7.6.2)	0.0179059	0.00631114	0.0172563	0.0120221	0.020603	0
666	SEED	Cofactors, Vitamins, Prosthetic Groups, Pigments	Thiamin_biosynthesis	Hydroxyethylthiazole kinase (EC 2.7.1.50)	Hydroxyethylthiazole kinase (EC 2.7.1.50)	0.00895295	0.0189334	0.0230083	0	0.0137353	0.00620501
667	SEED	Cofactors, Vitamins, Prosthetic Groups, Pigments	Tetrapyrroles	Coenzyme_B12_biosynthesis	Cobalt-precorrin-6y C15-methyltransferase [decarboxylating] (EC 2.1.1.-)	0.0134294	0.0126223	0.00575209	0.00601106	0.0137353	0.018615
668	SEED	Cofactors, Vitamins, Prosthetic Groups, Pigments	Tetrapyrroles	Coenzyme_B12_biosynthesis	Cobalt-precorrin-8x methylmutase (EC 5.4.1.2)	0.0134294	0.0126223	0.00575209	0.0120221	0.0137353	0.01241
669	SEED	Cofactors, Vitamins, Prosthetic Groups, Pigments	Biotin	Biotin_biosynthesis	Biotin synthesis protein bioG	0	0.0189334	0.0172563	0	0.020603	0.01241
670	SEED	Cofactors, Vitamins, Prosthetic Groups, Pigments	Folate and pterines	Molybdenum_cofactor_biosynthesis	Molybdopterin biosynthesis protein MoeB	0.0134294	0.0189334	0.0115042	0.00601106	0.00686766	0.01241
671	SEED	Cofactors, Vitamins, Prosthetic Groups, Pigments	Tetrapyrroles	Experimental_tye	Porphobilinogen deaminase (EC 2.5.1.61)	0.0223824	0.0252446	0	0.0120221	0.00686766	0
672	SEED	Cofactors, Vitamins, Prosthetic Groups, Pigments	Folate and pterines	Molybdenum_cofactor_biosynthesis	Molybdopterin biosynthesis protein MoeA	0.0179059	0.0126223	0.0230083	0.0120221	0	0
673	SEED	Cofactors, Vitamins, Prosthetic Groups, Pigments	Tetrapyrroles	Experimental_tye	Glutamyl-tRNA reductase (EC 1.2.1.70)	0.00895295	0.0189334	0.00575209	0.0180332	0.0137353	0
674	SEED	Cofactors, Vitamins, Prosthetic Groups, Pigments	Coenzyme A	Coenzyme_A_Biosynthesis	Substrate-specific component PanT of predicted pantothenate ECF transporter	0.0223824	0.00631114	0.0172563	0.0120221	0.00686766	0
675	SEED	Cofactors, Vitamins, Prosthetic Groups, Pigments	Thiamin_biosynthesis	Hydroxymethylpyrimidine ABC transporter, ATPase component	Hydroxymethylpyrimidine ABC transporter, ATPase component,	0.0134294	0.0189334	0.00575209	0.00601106	0.00686766	0.01241
676	SEED	Cofactors, Vitamins, Prosthetic Groups, Pigments	Quinone cofactors	Ubiquinone_Biosynthesis	3-polyprenyl-4-hydroxybenzoate carboxy-lyase (EC 4.1.1.-)	0.0179059	0.0189334	0	0.00601106	0.0137353	0.00620501
677	SEED	Cofactors, Vitamins, Prosthetic Groups, Pigments	Quinone cofactors	Ubiquinone_Biosynthesis	3-demethylubiquinone-9 3-methyltransferase (EC 2.1.1.64)	0.0134294	0.00631114	0.0115042	0.0120221	0.00686766	0.01241
678	SEED	Cofactors, Vitamins, Prosthetic Groups, Pigments	NAD and NADP	NAD_regulation	Transcriptional repressor for NAD biosynthesis in gram-positives	0.0179059	0.0315557	0.00575209	0	0.00686766	0
679	SEED	DNA Metabolism	DNA replication	DNA-replication	DNA polymerase III alpha subunit (EC 2.7.7.7)	0.572989	0.61218	0.540696	0.619139	0.405192	0.508811
680	SEED	DNA Metabolism	DNA repair	DNA_repair,_bacterial_MutL-MutS_system	DNA mismatch repair protein MutS	0.478983	0.429157	0.396894	0.348642	0.494472	0.434351
681	SEED	DNA Metabolism	Restriction-Modification_System	Type I restriction-modification system, restriction subunit R (EC 3.1.21.3)	Type I restriction-modification system, restriction subunit R (EC 3.1.21.3)	0.411836	0.435469	0.408398	0.402741	0.357118	0.316456
682	SEED	DNA Metabolism	DNA repair	DNA_repair,_UvrABC_system	Excinuclease ABC subunit A	0.313353	0.384979	0.299108	0.354653	0.473869	0.341276
683	SEED	DNA Metabolism	DNA replication	DNA-replication	DNA primase (EC 2.7.7.-)	0.268589	0.33449	0.184067	0.324597	0.302177	0.459171
684	SEED	DNA Metabolism	Restriction-Modification_System	Type I restriction-modification system, DNA-methyltransferase subunit M (EC 2.1.1.72)	Type I restriction-modification system, DNA-methyltransferase subunit M (EC 2.1.1.72)	0.31783	0.372357	0.258844	0.22842	0.247236	0.266816
685	SEED	DNA Metabolism	DNA repair	DNA_repair,_bacterial_RecFOR_pathway	ATP-dependent DNA helicase RecQ	0.174583	0.246134	0.224331	0.294542	0.281574	0.403326
686	SEED	DNA Metabolism	DNA replication	DNA-replication	Exodeoxyribonuclease V alpha chain (EC 3.1.11.5)	0.24173	0.328179	0.293356	0.216398	0.20603	0.266816
687	SEED	DNA Metabolism	DNA repair	DNA_repair,_bacterial_UvrD_and_related_helicases	ATP-dependent DNA helicase UvrD/PcrA	0.255159	0.132534	0.299108	0.210387	0.281574	0.310251
688	SEED	DNA Metabolism	DNA replication	DNA-replication	DNA polymerase I (EC 2.7.7.7)	0.16563	0.265068	0.253092	0.192354	0.212897	0.248201
689	SEED	DNA Metabolism	DNA replication	DNA_topoisomerases,_Type_I,_ATP-independent	DNA topoisomerase III (EC 5.99.1.2)	0.264112	0.258757	0.16681	0.210387	0.2335	0.19856
690	SEED	DNA Metabolism	DNA repair	DNA_Repair_Base_Excision	DNA ligase (EC 6.5.1.2)	0.273065	0.208268	0.161058	0.144265	0.295309	0.241996
691	SEED	DNA Metabolism	DNA repair	DNA_repair,_UvrABC_system	Excinuclease ABC subunit B	0.147724	0.201956	0.178315	0.198365	0.199162	0.235791
692	SEED	DNA Metabolism	DNA replication	DNA-replication	ATP-dependent DNA helicase RecG (EC 3.6.1.-)	0.1522	0.208268	0.184067	0.210387	0.2335	0.1241
693	SEED	DNA Metabolism	DNA repair	DNA_repair,_UvrABC_system	Excinuclease ABC subunit C	0.201441	0.189334	0.201323	0.120221	0.123618	0.229586
694	SEED	DNA Metabolism	DNA repair	DNA_repair,_bacterial	DNA repair protein RadA	0.183536	0.151467	0.178315	0.132243	0.157956	0.22338
695	SEED	DNA Metabolism	Restriction-Modification_System	Type I restriction-modification system, specificity subunit S (EC 3.1.21.3)	Type I restriction-modification system, specificity subunit S (EC 3.1.21.3)	0.183536	0.302935	0.16681	0.204376	0.0549413	0.11169
696	SEED	DNA Metabolism	DNA repair	DNA_repair,_bacterial_MutL-MutS_system	DNA mismatch repair protein MutL	0.156677	0.119912	0.143802	0.192354	0.151089	0.167535
697	SEED	DNA Metabolism	Restriction-Modification_System	Putative DNA-binding protein in cluster with Type I restriction-modification system	Putative DNA-binding protein in cluster with Type I restriction-modification system	0.111912	0.151467	0.172563	0.156288	0.11675	0.18615
698	SEED	DNA Metabolism	DNA replication	DNA-replication	Chromosomal replication initiator protein DnaA	0.16563	0.170401	0.13805	0.108199	0.130486	0.130305
699	SEED	DNA Metabolism	DNA repair	DNA_repair,_bacterial	RecA protein	0.085053	0.157778	0.120794	0.126232	0.137353	0.14892
700	SEED	DNA Metabolism	DNA repair	DNA_repair,_bacterial	DNA repair protein RecN	0.102959	0.145156	0.115042	0.144265	0.103015	0.16133
701	SEED	DNA Metabolism	Restriction-Modification_System	Type III restriction-modification system methylation subunit (EC 2.1.1.72)	Type III restriction-modification system methylation subunit (EC 2.1.1.72)	0.192488	0.189334	0.0517688	0.11421	0.0892796	0.130305
702	SEED	DNA Metabolism	DNA replication	DNA-replication	Holliday junction DNA helicase RuvB	0.183536	0.126223	0.143802	0.0721327	0.11675	0.11169
703	SEED	DNA Metabolism	DNA replication	DNA-replication	DNA polymerase III beta subunit (EC 2.7.7.7)	0.102959	0.0883559	0.132298	0.138254	0.103015	0.117895
704	SEED	DNA Metabolism	DNA repair	ATP-dependent_Nuclease	ATP-dependent nuclease, subunit A	0.120865	0.157778	0.0977854	0.138254	0.0686766	0.0868702
705	SEED	DNA Metabolism	DNA repair	DNA_repair,_bacterial_RecFOR_pathway	DNA recombination and repair protein RecF	0.111912	0.119912	0.13805	0.108199	0.0755443	0.0992802
706	SEED	DNA Metabolism	DNA repair	DNA_repair,_bacterial	DNA polymerase IV (EC 2.7.7.7)	0.085053	0.132534	0.126546	0.126232	0.0618089	0.11169
707	SEED	DNA Metabolism	DNA repair	DNA_repair,_bacterial	Exonuclease SbcC	0.1522	0.113601	0.0747771	0.108199	0.0961472	0.0434351
708	SEED	DNA Metabolism	DNA repair	ATP-dependent_Nuclease	ATP-dependent nuclease, subunit B	0.0984825	0.100978	0.120794	0.0841548	0.0549413	0.0806652
709	SEED	DNA Metabolism	DNA recombination	RuvABC_plus_a_hypothetical	FIG000859: hypothetical protein	0.0805766	0.0883559	0.0747771	0.0841548	0.130486	0.0806652
710	SEED	DNA Metabolism	DNA replication	DNA_topoisomerases,_Type_I,_ATP-independent	DNA topoisomerase III, Bacteroidales-type (EC 5.99.1.2)	0.085053	0.0757337	0.0747771	0.0901659	0.123618	0.0868702
711	SEED	DNA Metabolism	DNA repair	DNA_repair,_bacterial_RecFOR_pathway	Recombination protein RecR	0.102959	0.0694225	0.10929	0.0721327	0.11675	0.0558451
712	SEED	DNA Metabolism	DNA replication	Plasmid_replication	Chromosome (plasmid) partitioning protein ParA	0.0581942	0.0631114	0.103538	0.0661217	0.130486	0.0806652
713	SEED	DNA Metabolism	DNA repair	DNA_repair,_bacterial_MutL-MutS_system	Recombination inhibitory protein MutS2	0.0761001	0.0504891	0.103538	0.0901659	0.0618089	0.11169
714	SEED	DNA Metabolism	DNA repair	DNA_repair,_bacterial	Exodeoxyribonuclease VII large subunit (EC 3.1.11.6)	0.107435	0.0631114	0.0920334	0.0601106	0.0549413	0.0806652
715	SEED	DNA Metabolism	DNA replication	DNA-replication	Replicative DNA helicase (EC 3.6.1.-)	0.0447648	0.0378668	0.0920334	0.0781438	0.103015	0.0930752
716	SEED	DNA Metabolism	DNA repair	DNA_Repair_Base_Excision	Uracil-DNA glycosylase, family 1	0.0358118	0.0315557	0.132298	0.0601106	0.0755443	0.0868702
717	SEED	DNA Metabolism	DNA repair	DNA_repair,_bacterial	Exodeoxyribonuclease III (EC 3.1.11.2)	0.094006	0.100978	0.0632729	0.0661217	0.0343383	0.0496401
718	SEED	DNA Metabolism	DNA replication	DNA-replication	Holliday junction DNA helicase RuvA	0.0626707	0.0820448	0.0862813	0.0661217	0.0549413	0.0496401
719	SEED	DNA Metabolism	DNA repair	DNA_repair,_bacterial	DNA repair protein RadC	0.0402883	0.0504891	0.0517688	0.0540995	0.11675	0.0682552
720	SEED	DNA Metabolism	DNA repair	DNA_repair,_bacterial	Endonuclease IV (EC 3.1.21.2)	0.0492412	0.0504891	0.120794	0.0360664	0.041206	0.0682552
721	SEED	DNA Metabolism	DNA repair	DNA_repair,_bacterial	Exonuclease SbcD	0.0626707	0.0504891	0.0920334	0.0841548	0.0480736	0.01241
722	SEED	DNA Metabolism	DNA repair	DNA_repair,_bacterial	SOS-response repressor and protease LexA (EC 3.4.21.88)	0.0402883	0.0378668	0.0575209	0.0781438	0.0618089	0.0682552
723	SEED	DNA Metabolism	YcfH	Putative deoxyribonuclease YcfH	Putative deoxyribonuclease YcfH	0.0313353	0.0631114	0.0460167	0.0360664	0.0480736	0.11169
724	SEED	DNA Metabolism	CRISPRs	CRISPR-associated helicase Cas3	CRISPR-associated helicase Cas	0.0761001	0.0631114	0.0230083	0.096177	0.0343383	0.0434351
725	SEED	DNA Metabolism	DNA replication	DNA-replication	DNA polymerase III delta subunit (EC 2.7.7.7)	0.0581942	0.0820448	0.0460167	0.0360664	0.0480736	0.0620501
726	SEED	DNA Metabolism	DNA repair	DNA_repair,_bacterial	Methylated-DNA--protein-cysteine methyltransferase (EC 2.1.1.63)	0.0671471	0.044178	0.0805292	0.0661217	0.0480736	0.0248201
727	SEED	DNA Metabolism	DNA replication	DNA-replication	DNA replication protein DnaC	0.0671471	0.0883559	0.0345125	0.0480885	0.0480736	0.0434351
728	SEED	DNA Metabolism	DNA_structural_proteins,_bacterial	DNA-binding protein HU	DNA-binding protein HU	0.0313353	0.0568003	0.0747771	0.0661217	0.0549413	0.0434351
729	SEED	DNA Metabolism	DNA replication	DNA_replication,_archaeal	Ribonuclease HII (EC 3.1.26.4)	0.0447648	0.0315557	0.0287604	0.0841548	0.0892796	0.0434351
730	SEED	DNA Metabolism	DNA repair	DNA_repair,_bacterial	G:T/U mismatch-specific uracil/thymine DNA-glycosylase	0.0179059	0.0568003	0.069025	0.0420774	0.0480736	0.0620501
731	SEED	DNA Metabolism	CRISPRs	CRISPR-associated protein Cas1	CRISPR-associated protein Cas	0.0716236	0.0820448	0.0230083	0.0540995	0.0274706	0.0372301
732	SEED	DNA Metabolism	DNA repair	DNA_repair,_bacterial	DNA-damage-inducible protein J	0.0671471	0.0757337	0.0345125	0.0661217	0.0274706	0.00620501
733	SEED	DNA Metabolism	DNA repair	DNA_repair,_bacterial	DNA recombination protein RmuC	0.0313353	0.044178	0.0345125	0.0360664	0.0824119	0.0310251
734	SEED	DNA Metabolism	DNA replication	Plasmid_replication	Chromosome (plasmid) partitioning protein ParB	0.0223824	0.044178	0.0575209	0.0540995	0.0343383	0.0310251
735	SEED	DNA Metabolism	CRISPRs	CRISPR-associated protein, Csn1 family	CRISPR-associated protein, Csn1 family	0.0492412	0.044178	0.0575209	0.0240442	0.0137353	0.0496401
736	SEED	DNA Metabolism	DNA repair	DNA_repair,_bacterial	A/G-specific adenine glycosylase (EC 3.2.2.-)	0.0313353	0.0757337	0.0172563	0.0601106	0.0274706	0.018615
737	SEED	DNA Metabolism	DNA repair	DNA_repair,_bacterial_RecFOR_pathway	DNA recombination and repair protein RecO	0.0761001	0.0189334	0.0460167	0.0300553	0.020603	0.0248201
738	SEED	DNA Metabolism	DNA repair	DNA_repair,_bacterial_DinG_and_relatives	DinG family ATP-dependent helicase CPE1197	0.0581942	0.0694225	0.0230083	0.0240442	0.0274706	0.00620501
739	SEED	DNA Metabolism	CRISPRs	CRISPR-associated protein, TM1801 family	CRISPR-associated protein, TM1801 family	0.0537177	0.0189334	0.0460167	0.0300553	0.0343383	0.018615
740	SEED	DNA Metabolism	DNA repair	DNA_repair,_UvrABC_system	Excinuclease ABC subunit A paralog in greater Bacteroides group	0.0268589	0.0189334	0.0287604	0.0180332	0.0343383	0.0744602
741	SEED	DNA Metabolism	DNA replication	DNA-replication	DNA polymerase III delta prime subunit (EC 2.7.7.7)	0.0358118	0.0694225	0.0345125	0.0120221	0.00686766	0.0248201
742	SEED	DNA Metabolism	DNA repair	DNA_repair,_bacterial	Very-short-patch mismatch repair endonuclease (G-T specific)	0.0268589	0.0378668	0.0287604	0.0240442	0.00686766	0.0248201
743	SEED	DNA Metabolism	CRISPRs	CRISPR-associated protein, CT1133 family	CRISPR-associated protein, CT1133 family	0.0268589	0.0378668	0.0402646	0.0120221	0.00686766	0.018615
744	SEED	DNA Metabolism	DNA repair	DNA_repair,_bacterial_UvrD_and_related_helicases	putative ATP-dependent DNA helicase YjcD	0.0358118	0.0568003	0.0172563	0.0120221	0.00686766	0.01241
745	SEED	DNA Metabolism	DNA repair	DNA_Repair_Base_Excision	DNA-3-methyladenine glycosylase II (EC 3.2.2.21)	0.0134294	0.0126223	0.0230083	0.0300553	0.0343383	0.0248201
746	SEED	DNA Metabolism	DNA repair	DNA_repair,_UvrABC_system	Excinuclease ABC subunit A paralog of unknown function	0	0.0189334	0.0172563	0.0240442	0.041206	0.0310251
747	SEED	DNA Metabolism	DNA repair	DNA_Repair_Base_Excision	DNA-3-methyladenine glycosylase (EC 3.2.2.20)	0.0179059	0.0378668	0.0230083	0.0120221	0.0274706	0.01241
748	SEED	DNA Metabolism	CRISPRs	CRISPR-associated protein, CT1134 family	CRISPR-associated protein, CT1134 family	0.0313353	0.00631114	0.0345125	0.0120221	0.00686766	0.0372301
749	SEED	DNA Metabolism	DNA repair	DNA_repair,_bacterial_MutL-MutS_system	MutS-related protein, family 1	0.0268589	0.0315557	0.0287604	0.0240442	0.0137353	0
750	SEED	DNA Metabolism	DNA repair	DNA_repair,_bacterial_DinG_and_relatives	DinG family ATP-dependent helicase YoaA	0.0179059	0.0315557	0.0115042	0.0300553	0.0137353	0.01241
751	SEED	DNA Metabolism	DNA replication	DNA_topoisomerases,_Type_I,_ATP-independent	DNA topoisomerase III domain	0.00447648	0.0252446	0	0.0180332	0.0480736	0.018615
752	SEED	DNA Metabolism	Restriction-Modification_System	Putative predicted metal-dependent hydrolase	Putative predicted metal-dependent hydrolase	0.0268589	0.0189334	0.0287604	0.0120221	0.0137353	0.01241
753	SEED	DNA Metabolism	CRISPRs	CRISPR-associated protein Cas2	CRISPR-associated protein Cas	0.0179059	0.0189334	0.0115042	0.0240442	0.00686766	0.0248201
754	SEED	DNA Metabolism	DNA_structural_proteins,_bacterial	DNA-binding protein HU-beta	DNA-binding protein HU-beta	0.0268589	0	0.00575209	0.0480885	0.00686766	0.00620501
755	SEED	DNA Metabolism	DNA replication	DNA-replication	Helicase loader DnaI	0.0134294	0.0126223	0.0115042	0.0360664	0.0137353	0.00620501
756	SEED	DNA Metabolism	DNA repair	DNA_repair,_bacterial	Methyl-directed repair DNA adenine methylase (EC 2.1.1.72)	0.00895295	0.0315557	0.0172563	0.0120221	0.0137353	0.00620501
757	SEED	DNA Metabolism	DNA repair	DNA_repair,_bacterial_RecFOR_pathway	ATP-dependent DNA helicase, RecQ family	0.00895295	0.0126223	0.00575209	0.0240442	0.0137353	0.01241
758	SEED	DNA Metabolism	DNA repair	DNA_repair,_bacterial_MutL-MutS_system	Clostridial MutS2-related protein	0.0179059	0.0189334	0.0115042	0.00601106	0.0137353	0.00620501
759	SEED	DNA Metabolism	DNA_structural_proteins,_bacterial	DNA-binding protein HBsu	DNA-binding protein HBsu	0.00895295	0.0315557	0.00575209	0.0180332	0.00686766	0
760	SEED	DNA Metabolism	DNA repair	DNA_repair,_bacterial_UvrD_and_related_helicases	ATP-dependent DNA helicase Rep	0.00447648	0.0126223	0.00575209	0.0300553	0.00686766	0.00620501
761	SEED	DNA Metabolism	CRISPRs	CRISPR-associated RecB family exonuclease Cas4b	CRISPR-associated RecB family exonuclease Cas4b	0.0179059	0	0.00575209	0.0180332	0.020603	0
762	SEED	Dormancy and Sporulation	Sporulation_gene_orphans	Stage V sporulation protein B	Stage V sporulation protein B	0.143247	0.0883559	0.0862813	0.0901659	0.0343383	0.0310251
763	SEED	Dormancy and Sporulation	Sporulation_gene_orphans	Stage 0 sporulation two-component response regulator (Spo0A)	Stage 0 sporulation two-component response regulator (Spo0A) 2 5	0.116388	0.126223	0.0460167	0.0300553	0.0618089	0.0310251
764	SEED	Dormancy and Sporulation	Spore_Coat	Stage IV sporulation protein A	Stage IV sporulation protein A	0.0671471	0.044178	0.069025	0.0661217	0.0343383	0.0496401
765	SEED	Dormancy and Sporulation	Sporulation_gene_orphans	Stage IV sporulation protein B	Stage IV sporulation protein B, 1 8	0.0402883	0.0252446	0.0517688	0.108199	0.020603	0.0496401
766	SEED	Dormancy and Sporulation	Bacillus_biofilm_matrix_protein_component_TasA_and_homologs	Subtilase family domain protein	Subtilase family domain protein	0.0402883	0.0315557	0.0632729	0.00601106	0.0755443	0.0744602
767	SEED	Dormancy and Sporulation	Sporulation_gene_orphans	Stage V sporulation protein AF (SpoVAF)	Stage V sporulation protein AF (SpoVAF)	0.0402883	0.0883559	0.0230083	0.0360664	0.020603	0.0558451
768	SEED	Dormancy and Sporulation	Sporulation_gene_orphans	Stage V sporulation protein AD (SpoVAD)	Stage V sporulation protein AD (SpoVAD)	0.0537177	0.044178	0.0230083	0.0420774	0.0343383	0.0496401
769	SEED	Dormancy and Sporulation	Spore_Coat	Polypeptide composition of the spore coat protein CotJC	Polypeptide composition of the spore coat protein CotJC	0.0313353	0.0631114	0.0460167	0.0240442	0.041206	0.0372301
770	SEED	Dormancy and Sporulation	Sporulation_gene_orphans	Stage III sporulation protein AA	Stage III sporulation protein AA	0.0761001	0.0315557	0.0172563	0.0661217	0.020603	0.0310251
771	SEED	Dormancy and Sporulation	Spore_germination	Spore germination protein GerKA	Spore germination protein GerKA	0.0313353	0.0126223	0.069025	0.0360664	0.0549413	0.0310251
772	SEED	Dormancy and Sporulation	Sporulation_gene_orphans	Stage II sporulation protein D (SpoIID)	Stage II sporulation protein D (SpoIID), 1 0	0.0358118	0.0189334	0.0230083	0.0180332	0.0892796	0
773	SEED	Dormancy and Sporulation	Sporulation_gene_orphans	Stage V sporulation protein T, AbrB family transcriptional regulator (SpoVT)	Stage V sporulation protein T, AbrB family transcriptional regulator (SpoVT)	0.0402883	0.0378668	0.0287604	0.0360664	0.00686766	0.0248201
774	SEED	Dormancy and Sporulation	Spore_germination	Spore cortex-lytic enzyme, lytic transglycosylase SleB	Spore cortex-lytic enzyme, lytic transglycosylase SleB	0.0179059	0.0189334	0.0575209	0.0240442	0.0343383	0.01241
775	SEED	Dormancy and Sporulation	Sporulation_gene_orphans	Stage II sporulation protein P	Stage II sporulation protein P	0.0313353	0.0189334	0.0230083	0.0240442	0.0274706	0.0310251
776	SEED	Dormancy and Sporulation	Sporulation_gene_orphans	Stage V sporulation protein AC (SpoVAC)	Stage V sporulation protein AC (SpoVAC)	0.0447648	0.0378668	0.00575209	0.0240442	0.0137353	0.00620501
777	SEED	Dormancy and Sporulation	Sporulation_gene_orphans	Stage III sporulation protein AE	Stage III sporulation protein AE	0.0179059	0.00631114	0.0115042	0.0240442	0.020603	0.0310251
778	SEED	Dormancy and Sporulation	Spore_Coat	Spore coat protein S	Spore coat protein S	0.00895295	0.044178	0.0172563	0.0120221	0.0274706	0
779	SEED	Dormancy and Sporulation	Sporulation_gene_orphans	Stage II sporulation protein required for processing of pro-sigma-E (SpoIIR)	Stage II sporulation protein required for processing of pro-sigma-E (SpoIIR)	0.0134294	0.0757337	0.0172563	0	0	0
780	SEED	Dormancy and Sporulation	Spore_germination	Spore cortex-lytic enzyme, N-acetylglucosaminidase SleL (EC 3.2.1.-)	Spore cortex-lytic enzyme, N-acetylglucosaminidase SleL (EC 3.2.1.-)	0.0268589	0.0315557	0.0115042	0.00601106	0.00686766	0.01241
781	SEED	Dormancy and Sporulation	Sporulation_gene_orphans	Stage III sporulation protein AC	Stage III sporulation protein AC	0.0179059	0.0189334	0.0402646	0	0.00686766	0
782	SEED	Dormancy and Sporulation	Sporulation_gene_orphans	Stage III sporulation protein D	Stage III sporulation protein D	0.0223824	0.00631114	0.00575209	0.0180332	0.020603	0.00620501
783	SEED	Dormancy and Sporulation	Sporulation_gene_orphans	Stage II sporulation serine phosphatase for sigma-F activation (SpoIIE)	Stage II sporulation serine phosphatase for sigma-F activation (SpoIIE)	0.0134294	0	0.00575209	0.00601106	0.0343383	0.018615
784	SEED	Dormancy and Sporulation	Spore_germination	Germination-specific N-acetylmuramoyl-L-alanine amidase (EC 3.5.1.28), cell wall hydrolase CwlD	Germination-specific N-acetylmuramoyl-L-alanine amidase (EC 3.5.1.28), cell wall hydrolase CwlD	0.0179059	0.0252446	0.00575209	0.0180332	0.00686766	0
785	SEED	Dormancy and Sporulation	Sporulation_gene_orphans	Stage V sporulation protein E	Stage V sporulation protein E	0.00895295	0.00631114	0.0230083	0.00601106	0.00686766	0.018615
786	SEED	Fatty Acids, Lipids, and Isoprenoids	Isoprenoids	Isoprenoid_Biosynthesis	1-deoxy-D-xylulose 5-phosphate synthase (EC 2.2.1.7)	0.125341	0.176712	0.230083	0.162299	0.151089	0.217175
787	SEED	Fatty Acids, Lipids, and Isoprenoids	Fatty acids	Fatty_Acid_Biosynthesis_FASII	3-oxoacyl-[acyl-carrier protein] reductase (EC 1.1.1.100)	0.120865	0.170401	0.224331	0.16831	0.144221	0.167535
788	SEED	Fatty Acids, Lipids, and Isoprenoids	Fatty acids	Fatty_Acid_Biosynthesis_FASII	3-oxoacyl-[acyl-carrier-protein] synthase, KASII (EC 2.3.1.41)	0.125341	0.0946671	0.13805	0.126232	0.0892796	0.21097
789	SEED	Fatty Acids, Lipids, and Isoprenoids	Phospholipids	Glycerolipid_and_Glycerophospholipid_Metabolism_in_Bacteria	Cardiolipin synthetase (EC 2.7.8.-)	0.107435	0.170401	0.0632729	0.0661217	0.157956	0.105485
790	SEED	Fatty Acids, Lipids, and Isoprenoids	Phospholipids	Glycerolipid_and_Glycerophospholipid_Metabolism_in_Bacteria	Glycerol kinase (EC 2.7.1.30)	0.138771	0.044178	0.120794	0.102188	0.171692	0.0434351
791	SEED	Fatty Acids, Lipids, and Isoprenoids	Phospholipids	Glycerolipid_and_Glycerophospholipid_Metabolism_in_Bacteria	Dihydroxyacetone kinase family protein	0.134294	0.119912	0.161058	0.0540995	0.0686766	0.0682552
792	SEED	Fatty Acids, Lipids, and Isoprenoids	Fatty acids	Fatty_Acid_Biosynthesis_FASII	Acyl carrier protein	0.0805766	0.113601	0.0862813	0.0540995	0.0892796	0.142715
793	SEED	Fatty Acids, Lipids, and Isoprenoids	Isoprenoids	Isoprenoid_Biosynthesis	2-C-methyl-D-erythritol 4-phosphate cytidylyltransferase (EC 2.7.7.60)	0.102959	0.0820448	0.0575209	0.126232	0.0824119	0.0868702
794	SEED	Fatty Acids, Lipids, and Isoprenoids	Fatty acids	Fatty_Acid_Biosynthesis_FASII	3-oxoacyl-[acyl-carrier-protein] synthase, KASIII (EC 2.3.1.41)	0.094006	0.0757337	0.069025	0.0781438	0.103015	0.117895
795	SEED	Fatty Acids, Lipids, and Isoprenoids	Isoprenoids	Isoprenoid_Biosynthesis	1-deoxy-D-xylulose 5-phosphate reductoisomerase (EC 1.1.1.267)	0.0626707	0.132534	0.0977854	0.0841548	0.0892796	0.0558451
796	SEED	Fatty Acids, Lipids, and Isoprenoids	Phospholipids	Glycerolipid_and_Glycerophospholipid_Metabolism_in_Bacteria	Glycerol-3-phosphate dehydrogenase [NAD(P)+] (EC 1.1.1.94)	0.0895295	0.0757337	0.0977854	0.0601106	0.109883	0.0496401
797	SEED	Fatty Acids, Lipids, and Isoprenoids	Fatty acids	Fatty_Acid_Biosynthesis_FASII	Malonyl CoA-acyl carrier protein transacylase (EC 2.3.1.39)	0.0805766	0.0189334	0.0920334	0.0180332	0.0824119	0.1241
798	SEED	Fatty Acids, Lipids, and Isoprenoids	Isoprenoids	polyprenyl_synthesis	undecaprenyl diphosphate synthase	0.0447648	0.0883559	0.0517688	0.0480885	0.0824119	0.0682552
799	SEED	Fatty Acids, Lipids, and Isoprenoids	Isoprenoids	Isoprenoid_Biosynthesis	4-diphosphocytidyl-2-C-methyl-D-erythritol kinase (EC 2.7.1.148)	0.0581942	0.0504891	0.0920334	0.0721327	0.0343383	0.0744602
800	SEED	Fatty Acids, Lipids, and Isoprenoids	Phospholipids	Glycerolipid_and_Glycerophospholipid_Metabolism_in_Bacteria	Alcohol dehydrogenase (EC 1.1.1.1)	0.0626707	0.0757337	0.115042	0.0300553	0.020603	0.0620501
801	SEED	Fatty Acids, Lipids, and Isoprenoids	Phospholipids	Glycerolipid_and_Glycerophospholipid_Metabolism_in_Bacteria	1-acyl-sn-glycerol-3-phosphate acyltransferase (EC 2.3.1.51)	0.0492412	0.0504891	0.0287604	0.0781438	0.0274706	0.130305
802	SEED	Fatty Acids, Lipids, and Isoprenoids	Phospholipids	Glycerolipid_and_Glycerophospholipid_Metabolism_in_Bacteria	Phosphate:acyl-ACP acyltransferase PlsX	0.0537177	0.0568003	0.0575209	0.0781438	0.0343383	0.0558451
803	SEED	Fatty Acids, Lipids, and Isoprenoids	Isoprenoids	Isoprenoid_Biosynthesis	Undecaprenyl pyrophosphate synthetase (EC 2.5.1.31)	0.0402883	0.044178	0.0920334	0.0240442	0.041206	0.0682552
804	SEED	Fatty Acids, Lipids, and Isoprenoids	Phospholipids	Glycerolipid_and_Glycerophospholipid_Metabolism_in_Bacteria	Phosphatidate cytidylyltransferase (EC 2.7.7.41)	0.0447648	0.0252446	0.0747771	0.0420774	0.0480736	0.0434351
805	SEED	Fatty Acids, Lipids, and Isoprenoids	Fatty acids	Fatty_Acid_Biosynthesis_FASII	Biotin carboxylase of acetyl-CoA carboxylase (EC 6.3.4.14)	0.0223824	0.0378668	0.0460167	0.0841548	0.020603	0.0620501
806	SEED	Fatty Acids, Lipids, and Isoprenoids	Fatty acids	Fatty_Acid_Biosynthesis_FASII	Enoyl-[acyl-carrier-protein] reductase [FMN] (EC 1.3.1.9)	0.0358118	0.0315557	0.0172563	0.0661217	0.0343383	0.0744602
807	SEED	Fatty Acids, Lipids, and Isoprenoids	Isoprenoids	Isoprenoid_Biosynthesis	2-C-methyl-D-erythritol 4-cyclodiphosphate synthase (EC 4.6.1.12)	0.0402883	0.044178	0.0632729	0.0300553	0.0343383	0.0434351
808	SEED	Fatty Acids, Lipids, and Isoprenoids	Phospholipids	Glycerolipid_and_Glycerophospholipid_Metabolism_in_Bacteria	Phosphatidylserine decarboxylase (EC 4.1.1.65)	0.00895295	0.0315557	0.0345125	0.0480885	0.0343383	0.0930752
809	SEED	Fatty Acids, Lipids, and Isoprenoids	Phospholipids	Glycerolipid_and_Glycerophospholipid_Metabolism_in_Bacteria	Glycerate kinase (EC 2.7.1.31)	0.00895295	0.0631114	0.0287604	0.0420774	0.0824119	0.01241
810	SEED	Fatty Acids, Lipids, and Isoprenoids	Phospholipids	Glycerolipid_and_Glycerophospholipid_Metabolism_in_Bacteria	Acyl-phosphate:glycerol-3-phosphate O-acyltransferase PlsY	0.0402883	0.0504891	0.0460167	0.0300553	0.0549413	0.01241
811	SEED	Fatty Acids, Lipids, and Isoprenoids	Isoprenoids	Isoprenoid_Biosynthesis	4-hydroxy-3-methylbut-2-enyl diphosphate reductase (EC 1.17.1.2)	0.0492412	0.0315557	0.0287604	0.00601106	0.0618089	0.0434351
812	SEED	Fatty Acids, Lipids, and Isoprenoids	Phospholipids	Glycerolipid_and_Glycerophospholipid_Metabolism_in_Bacteria	CDP-diacylglycerol--glycerol-3-phosphate 3-phosphatidyltransferase (EC 2.7.8.5)	0.0223824	0.0252446	0.0460167	0.0540995	0.00686766	0.0496401
813	SEED	Fatty Acids, Lipids, and Isoprenoids	Isoprenoids	Isoprenoid_Biosynthesis	Isopentenyl-diphosphate delta-isomerase (EC 5.3.3.2)	0.0447648	0.0252446	0.0575209	0.0120221	0.020603	0.0372301
814	SEED	Fatty Acids, Lipids, and Isoprenoids	Phospholipids	Glycerolipid_and_Glycerophospholipid_Metabolism_in_Bacteria	CDP-diacylglycerol--serine O-phosphatidyltransferase (EC 2.7.8.8)	0.0402883	0.0189334	0.0172563	0.0300553	0.041206	0.0496401
815	SEED	Fatty Acids, Lipids, and Isoprenoids	Fatty acids	Fatty_Acid_Biosynthesis_FASII	Acetyl-coenzyme A carboxyl transferase alpha chain (EC 6.4.1.2)	0.0402883	0.0504891	0.0230083	0.0180332	0.00686766	0.0434351
816	SEED	Fatty Acids, Lipids, and Isoprenoids	Isoprenoids	polyprenyl_synthesis	decaprenyl diphosphate synthase	0.00895295	0.00631114	0.0287604	0.0300553	0.0343383	0.0558451
817	SEED	Fatty Acids, Lipids, and Isoprenoids	Isoprenoids	Carotenoids	Carotenoid cis-trans isomerase (EC 5.2.-.-)	0.0268589	0.0126223	0.0345125	0.0120221	0.020603	0.0372301
818	SEED	Fatty Acids, Lipids, and Isoprenoids	Fatty acids	Fatty_Acid_Biosynthesis_FASII	Biotin carboxyl carrier protein of acetyl-CoA carboxylase	0.00447648	0.0189334	0.0230083	0.0240442	0.0274706	0.0434351
819	SEED	Fatty Acids, Lipids, and Isoprenoids	Fatty acids	Fatty_Acid_Biosynthesis_FASII	(3R)-hydroxymyristoyl-[acyl carrier protein] dehydratase (EC 4.2.1.-)	0.0358118	0	0.0287604	0.0180332	0.020603	0.018615
820	SEED	Fatty Acids, Lipids, and Isoprenoids	Triacylglycerols	Triacylglycerol_metabolism	Lysophospholipase (EC 3.1.1.5)	0.0134294	0.00631114	0.0287604	0.0180332	0.0274706	0.0248201
821	SEED	Fatty Acids, Lipids, and Isoprenoids	Fatty acids	Fatty_Acid_Biosynthesis_FASII	Acetyl-coenzyme A carboxyl transferase beta chain (EC 6.4.1.2)	0.0134294	0.0315557	0.0172563	0.0120221	0.00686766	0.018615
822	SEED	Fatty Acids, Lipids, and Isoprenoids	Polyhydroxybutyrate_metabolism	D-beta-hydroxybutyrate dehydrogenase (EC 1.1.1.30)	D-beta-hydroxybutyrate dehydrogenase (EC 1.1.1.30)	0.00895295	0.0126223	0	0.00601106	0.0274706	0.0310251
823	SEED	Fatty Acids, Lipids, and Isoprenoids	Phospholipids	Glycerolipid_and_Glycerophospholipid_Metabolism_in_Bacteria	Diacylglycerol kinase (EC 2.7.1.107)	0.00447648	0.0252446	0.00575209	0.0120221	0.020603	0.00620501
824	SEED	Fatty Acids, Lipids, and Isoprenoids	Phospholipids	Glycerolipid_and_Glycerophospholipid_Metabolism_in_Bacteria	Phosphatidylglycerophosphatase B (EC 3.1.3.27)	0.0134294	0	0.00575209	0.00601106	0.00686766	0.0310251
825	SEED	Membrane Transport	Transport_of_Zinc	COG0523: Putative GTPases (G3E family)	COG0523: Putative GTPases (G3E family)	0.147724	0.107289	0.0977854	0.096177	0.109883	0.0930752
826	SEED	Membrane Transport	Potassium_homeostasis	Potassium uptake protein TrkH	Potassium uptake protein TrkH	0.0761001	0.0757337	0.155306	0.0841548	0.123618	0.13651
827	SEED	Membrane Transport	Potassium_homeostasis	Potassium uptake protein, integral membrane component, KtrB	Potassium uptake protein, integral membrane component, KtrB	0.0761001	0.119912	0.0920334	0.138254	0.109883	0.0992802
828	SEED	Membrane Transport	Sugar Phosphotransferase Systems, PTS	Fructose_and_Mannose_Inducible_PTS	Phosphoenolpyruvate-protein phosphotransferase of PTS system (EC 2.7.3.9)	0.0761001	0.0504891	0.0805292	0.108199	0.0686766	0.14892
829	SEED	Membrane Transport	Potassium_homeostasis	Osmosensitive K+ channel histidine kinase KdpD (EC 2.7.3.-)	Osmosensitive K+ channel histidine kinase KdpD (EC 2.7.3.-) 2 7	0.111912	0.0504891	0.115042	0.0480885	0.0549413	0.0434351
830	SEED	Membrane Transport	Potassium_homeostasis	POTASSIUM/PROTON ANTIPORTER ROSB	POTASSIUM/PROTON ANTIPORTER ROSB	0.0313353	0.0315557	0.0345125	0.0540995	0.109883	0.0868702
831	SEED	Membrane Transport	Potassium_homeostasis	Kup system potassium uptake protein	Kup system potassium uptake protein	0.00895295	0.044178	0.0862813	0.0540995	0.0343383	0.0930752
832	SEED	Membrane Transport	Potassium_homeostasis	Large-conductance mechanosensitive channel	Large-conductance mechanosensitive channel	0.0716236	0.0252446	0.0287604	0.0540995	0.041206	0.0434351
833	SEED	Membrane Transport	Transport_of_Zinc	Zinc ABC transporter, periplasmic-binding protein ZnuA	Zinc ABC transporter, periplasmic-binding protein ZnuA	0.0313353	0.0504891	0.00575209	0.0360664	0.0961472	0.0372301
834	SEED	Membrane Transport	Transport_of_Zinc	Zinc ABC transporter, inner membrane permease protein ZnuB	Zinc ABC transporter, inner membrane permease protein ZnuB	0.0268589	0.0189334	0.0230083	0.0601106	0.0618089	0.0372301
835	SEED	Membrane Transport	Potassium_homeostasis	Potassium voltage-gated channel subfamily KQT	Potassium voltage-gated channel subfamily KQT	0.00895295	0.0504891	0.0287604	0.0240442	0.0755443	0.0372301
836	SEED	Membrane Transport	Uni- Sym- and Antiporters	Na(+)_H(+)_antiporter	Na+/H+ antiporter NhaD type	0.0179059	0.0189334	0.0862813	0.0120221	0.0137353	0.0620501
837	SEED	Membrane Transport	ABC transporters	ABC_transporter_branched-chain_amino_acid_(TC_3.A.1.4.1)	High-affinity branched-chain amino acid transport system permease protein LivH (TC 3.A.1.4.1)	0.0492412	0.0694225	0.0517688	0.0120221	0	0.01241
838	SEED	Membrane Transport	Transport_of_Zinc	Zinc-regulated zinc transporting ATPase ZntA	Zinc-regulated zinc transporting ATPase ZntA	0.0179059	0.0126223	0.0230083	0.0420774	0.0274706	0.0496401
839	SEED	Membrane Transport	Transport_of_Zinc	Zinc ABC transporter, ATP-binding protein ZnuC	Zinc ABC transporter, ATP-binding protein ZnuC	0.0492412	0.00631114	0.0287604	0.0300553	0.0343383	0.018615
840	SEED	Membrane Transport	ABC transporters	ABC_transporter_branched-chain_amino_acid_(TC_3.A.1.4.1)	Branched-chain amino acid ABC transporter, amino acid-binding protein (TC 3.A.1.4.1)	0.0268589	0.0126223	0.0230083	0.0360664	0.0343383	0.0248201
841	SEED	Membrane Transport	Transport_of_Zinc	Zinc transporter, ZIP family	Zinc transporter, ZIP family	0.00447648	0.0315557	0.0402646	0.0360664	0.00686766	0.0372301
842	SEED	Membrane Transport	Potassium_homeostasis	Potassium uptake protein, integral membrane component, KtrA	Potassium uptake protein, integral membrane component, KtrA	0.0223824	0.0189334	0.0230083	0.0240442	0.0343383	0.0310251
843	SEED	Membrane Transport	Transport_of_Nickel_and_Cobalt	ATPase component NikO of energizing module of nickel ECF transporter	ATPase component NikO of energizing module of nickel ECF transporter	0.00895295	0	0.0460167	0.0180332	0.0274706	0.0248201
844	SEED	Membrane Transport	Potassium_homeostasis	Trk system potassium uptake protein TrkG	Trk system potassium uptake protein TrkG	0.0313353	0.0252446	0.0172563	0.0180332	0.0137353	0.018615
845	SEED	Membrane Transport	Uni- Sym- and Antiporters	Na(+)_H(+)_antiporter	Na+/H+ antiporter NhaA type	0.00895295	0.0189334	0.00575209	0.0120221	0.041206	0.0310251
846	SEED	Membrane Transport	Potassium_homeostasis	FKBP-type peptidyl-prolyl cis-trans isomerase FkpA precursor (EC 5.2.1.8)	FKBP-type peptidyl-prolyl cis-trans isomerase FkpA precursor (EC 5.2.1.8)	0.0134294	0.0189334	0.0172563	0.0240442	0.0274706	0.01241
847	SEED	Membrane Transport	Potassium_homeostasis	FKBP-type peptidyl-prolyl cis-trans isomerase SlyD (EC 5.2.1.8)	FKBP-type peptidyl-prolyl cis-trans isomerase SlyD (EC 5.2.1.8)	0.00447648	0.00631114	0	0.0300553	0.041206	0.0310251
848	SEED	Membrane Transport	Potassium_homeostasis	Potassium-transporting ATPase B chain (EC 3.6.3.12) (TC 3.A.3.7.1)	Potassium-transporting ATPase B chain (EC 3.6.3.12) (TC 3.A.3.7.1)	0.0134294	0.0189334	0.0402646	0.0120221	0.00686766	0.00620501
849	SEED	Membrane Transport	Transport_of_Nickel_and_Cobalt	Substrate-specific component NikM of nickel ECF transporter	Substrate-specific component NikM of nickel ECF transporter	0.00895295	0.0126223	0.0172563	0.0240442	0.0137353	0.00620501
850	SEED	Membrane Transport	Potassium_homeostasis	KdpE	KdpE	0.00447648	0.0315557	0.0115042	0.00601106	0.00686766	0.01241
851	SEED	Membrane Transport	Transport_of_Manganese	Manganese transport protein MntH	Manganese transport protein MntH	0.00447648	0	0.0172563	0.0300553	0	0.018615
852	SEED	Membrane Transport	Potassium_homeostasis	Potassium-transporting ATPase A chain (EC 3.6.3.12) (TC 3.A.3.7.1)	Potassium-transporting ATPase A chain (EC 3.6.3.12) (TC 3.A.3.7.1)	0.00447648	0.0126223	0.00575209	0.0240442	0.00686766	0.01241
853	SEED	Membrane Transport	Transport_of_Nickel_and_Cobalt	Transmembrane component NikQ of energizing module of nickel ECF transporter	Transmembrane component NikQ of energizing module of nickel ECF transporter	0.0223824	0.00631114	0.0115042	0.00601106	0.0137353	0.00620501
854	SEED	Metabolism of Aromatic Compounds	Peripheral pathways for catabolism of aromatic compounds	n-Phenylalkanoic_acid_degradation	Long-chain-fatty-acid--CoA ligase (EC 6.2.1.3)	0.250683	0.271379	0.333621	0.22842	0.274706	0.347481
855	SEED	Metabolism of Aromatic Compounds	Metabolism of central aromatic intermediates	Protocatechuate_branch_of_beta-ketoadipate_pathway	4-carboxymuconolactone decarboxylase (EC 4.1.1.44)	0.0716236	0.0631114	0.0575209	0.102188	0.0686766	0.0930752
856	SEED	Metabolism of Aromatic Compounds	Metabolism of central aromatic intermediates	Central_meta-cleavage_pathway_of_aromatic_compound_degradation	2-polyprenylphenol hydroxylase and related flavodoxin oxidoreductases	0.0537177	0.0315557	0.0575209	0.0420774	0.0137353	0.0558451
857	SEED	Metabolism of Aromatic Compounds	Metabolism of central aromatic intermediates	Catechol_branch_of_beta-ketoadipate_pathway	mandelate racemase/muconate lactonizing enzyme family protein	0.0134294	0.0126223	0.0230083	0.0240442	0.0137353	0.0372301
858	SEED	Metabolism of Aromatic Compounds	Benzoate_transport_and_degradation_cluster	Fumarylacetoacetate hydrolase family protein	Fumarylacetoacetate hydrolase family protein	0.0313353	0	0.0230083	0	0.0343383	0.018615
859	SEED	Metabolism of Aromatic Compounds	Metabolism of central aromatic intermediates	Homogentisate_pathway_of_aromatic_compound_degradation	Transcriptional regulator, IclR family	0.0179059	0.00631114	0	0.0300553	0.020603	0
860	SEED	Metabolism of Aromatic Compounds	Metabolism of central aromatic intermediates	4-Hydroxyphenylacetic_acid_catabolic_pathway	4-hydroxyphenylacetate 3-monooxygenase (EC 1.14.13.3)	0.00447648	0.0189334	0.00575209	0.0180332	0.0137353	0.00620501
861	SEED	Metabolism of Aromatic Compounds	Metabolism of central aromatic intermediates	Homogentisate_pathway_of_aromatic_compound_degradation	Aromatic-amino-acid aminotransferase (EC 2.6.1.57)	0.00895295	0	0.00575209	0.0180332	0.0343383	0
862	SEED	Miscellaneous	ZZ_gjo_need_homes	Na+/H+ antiporter	Na+/H+ antiporter	0.259636	0.189334	0.281852	0.312575	0.274706	0.279226
863	SEED	Miscellaneous	ZZ_gjo_need_homes	Lipid A export ATP-binding/permease protein MsbA	Lipid A export ATP-binding/permease protein MsbA	0.308877	0.252446	0.230083	0.300553	0.219765	0.217175
864	SEED	Miscellaneous	ZZ_gjo_need_homes	Transcription accessory protein (S1 RNA-binding domain)	Transcription accessory protein (S1 RNA-binding domain)	0.134294	0.16409	0.0632729	0.126232	0.0892796	0.0930752
865	SEED	Miscellaneous	ZZ_gjo_need_homes	Pole remodelling regulatory diguanylate cyclase	Pole remodelling regulatory diguanylate cyclase	0.0626707	0.0883559	0.0287604	0.0841548	0.0480736	0.00620501
866	SEED	Miscellaneous	ZZ_gjo_need_homes	Putative GTP-binding protien TM0445	Putative GTP-binding protien TM044	0.0402883	0.044178	0.0460167	0.0901659	0.020603	0.0620501
867	SEED	Miscellaneous	YbbK	Putative stomatin/prohibitin-family membrane protease subunit YbbK	Putative stomatin/prohibitin-family membrane protease subunit YbbK	0.0492412	0.0504891	0.0747771	0.096177	0.0137353	0.018615
868	SEED	Miscellaneous	ZZ_gjo_need_homes	Proton/glutamate symport protein	Proton/glutamate symport protein	0.0671471	0.0252446	0.0575209	0.0180332	0.0686766	0.0310251
869	SEED	Miscellaneous	YaaA	UPF0246 protein YaaA	UPF0246 protein YaaA	0.0492412	0.0252446	0.0115042	0.0300553	0.0137353	0.01241
870	SEED	Miscellaneous	ZZ_gjo_need_homes	Protein of unknown function DUF81	Protein of unknown function DUF8	0.00895295	0.0189334	0.00575209	0.0360664	0	0
871	SEED	Miscellaneous	ZZ_gjo_need_homes	Proposed peptidoglycan lipid II flippase MurJ	Proposed peptidoglycan lipid II flippase MurJ	0.0223824	0.00631114	0.00575209	0.0180332	0.0137353	0
872	SEED	Motility and Chemotaxis	Flagellar motility in Prokaryota	Flagellar_motility	Signal transduction histidine kinase CheA (EC 2.7.3.-)	0.138771	0.138845	0.0287604	0.0540995	0.0755443	0.0248201
873	SEED	Motility and Chemotaxis	Flagellar motility in Prokaryota	Flagellum	Flagellar hook-length control protein FliK	0.111912	0.0946671	0.0805292	0.0360664	0.0549413	0.0310251
874	SEED	Motility and Chemotaxis	Flagellar motility in Prokaryota	Flagellar_motility	Flagellin	0.0805766	0.126223	0.0460167	0.0901659	0.0343383	0.0248201
875	SEED	Motility and Chemotaxis	Flagellar motility in Prokaryota	Flagellar_motility	Flagellar biosynthesis protein FlhA	0.107435	0.0946671	0.0172563	0.0420774	0.0892796	0.018615
876	SEED	Motility and Chemotaxis	Flagellar motility in Prokaryota	Flagellar_motility	Chemotaxis regulator - transmits chemoreceptor signals to flagelllar motor components CheY	0.0716236	0.113601	0.0460167	0.0601106	0.041206	0.01241
877	SEED	Motility and Chemotaxis	Flagellar motility in Prokaryota	Flagellum	Flagellar hook-associated protein FlgK	0.107435	0.107289	0.0230083	0.0420774	0.0343383	0.00620501
878	SEED	Motility and Chemotaxis	Bacterial_Chemotaxis	Dipeptide-binding ABC transporter, periplasmic substrate-binding component (TC 3.A.1.5.2)	Dipeptide-binding ABC transporter, periplasmic substrate-binding component (TC 3.A.1.5.2)	0.0805766	0.0378668	0.0172563	0.0540995	0.020603	0.018615
879	SEED	Motility and Chemotaxis	Bacterial_Chemotaxis	Chemotaxis response regulator protein-glutamate methylesterase CheB (EC 3.1.1.61)	Chemotaxis response regulator protein-glutamate methylesterase CheB (EC 3.1.1.61)	0.0447648	0.0378668	0.0115042	0.0540995	0.0686766	0.00620501
880	SEED	Motility and Chemotaxis	Flagellar motility in Prokaryota	Flagellar_motility	Flagellum-specific ATP synthase FliI	0.0895295	0.0631114	0.00575209	0.0240442	0.0274706	0.01241
881	SEED	Motility and Chemotaxis	Flagellar motility in Prokaryota	Flagellum_in_Campylobacter	Flagellin protein FlaA	0.0626707	0.0568003	0	0.0540995	0.0343383	0.01241
882	SEED	Motility and Chemotaxis	Flagellar motility in Prokaryota	Flagellar_motility	Flagellar biosynthesis protein FlhB	0.0447648	0.0757337	0	0.0240442	0.0618089	0.00620501
883	SEED	Motility and Chemotaxis	Bacterial_Chemotaxis	Chemotaxis protein methyltransferase CheR (EC 2.1.1.80)	Chemotaxis protein methyltransferase CheR (EC 2.1.1.80)	0.0581942	0.0694225	0.0345125	0.0300553	0.0137353	0
884	SEED	Motility and Chemotaxis	Flagellar motility in Prokaryota	Flagellar_motility	Flagellar motor switch protein FliN	0.0447648	0.044178	0	0.0721327	0.0343383	0.00620501
885	SEED	Motility and Chemotaxis	Bacterial_Chemotaxis	Methyl-accepting chemotaxis protein I (serine chemoreceptor protein)	Methyl-accepting chemotaxis protein I (serine chemoreceptor protein)	0.0492412	0.0757337	0	0.0360664	0.0343383	0.00620501
886	SEED	Motility and Chemotaxis	Flagellar motility in Prokaryota	Flagellum	Flagellar motor switch protein FliG	0.0492412	0.0568003	0.00575209	0.0420774	0.020603	0
887	SEED	Motility and Chemotaxis	Flagellar motility in Prokaryota	Flagellum	Flagellar hook protein FlgE	0.0492412	0.0631114	0.0115042	0.0120221	0.0274706	0.00620501
888	SEED	Motility and Chemotaxis	Flagellar motility in Prokaryota	Flagellar_motility	Chemotaxis protein CheV (EC 2.7.3.-)	0.0581942	0.0631114	0	0.0120221	0.020603	0.01241
889	SEED	Motility and Chemotaxis	Flagellar motility in Prokaryota	Flagellum	Flagellar hook-associated protein FliD	0.0581942	0.0504891	0.0115042	0.0360664	0.00686766	0
890	SEED	Motility and Chemotaxis	Flagellar motility in Prokaryota	Flagellum	Flagellar basal-body rod protein FlgG	0.0402883	0.0189334	0.00575209	0.0300553	0.0618089	0.00620501
891	SEED	Motility and Chemotaxis	Flagellar motility in Prokaryota	Flagellar_motility	Predicted signal transduction protein	0.0358118	0.0504891	0.00575209	0.0540995	0.00686766	0
892	SEED	Motility and Chemotaxis	Flagellar motility in Prokaryota	Flagellar_motility	Flagellar motor rotation protein MotB	0.0268589	0.0504891	0	0.00601106	0.0480736	0.01241
893	SEED	Motility and Chemotaxis	Flagellar motility in Prokaryota	Flagellar_motility	Flagellar motor rotation protein MotA	0.0358118	0.0315557	0.0230083	0.00601106	0.0274706	0.018615
894	SEED	Motility and Chemotaxis	Flagellar motility in Prokaryota	Flagellar_motility	Flagellar motor switch protein FliM	0.0537177	0.044178	0	0.0180332	0.0137353	0.00620501
895	SEED	Motility and Chemotaxis	Flagellar motility in Prokaryota	Flagellum	Flagellar M-ring protein FliF	0.0402883	0.0504891	0.00575209	0.0120221	0.0137353	0.00620501
896	SEED	Motility and Chemotaxis	Flagellar motility in Prokaryota	Flagellum_in_Campylobacter	Flagellar basal-body rod protein FlgC	0.0268589	0.044178	0.00575209	0.0180332	0.0137353	0.00620501
897	SEED	Motility and Chemotaxis	Bacterial_Chemotaxis	Positive regulator of CheA protein activity (CheW)	Positive regulator of CheA protein activity (CheW)	0.0402883	0.0315557	0	0.0180332	0.0137353	0.00620501
898	SEED	Motility and Chemotaxis	Bacterial_Chemotaxis	Chemotaxis protein CheC -- inhibitor of MCP methylation	Chemotaxis protein CheC -- inhibitor of MCP methylation	0.0179059	0.0252446	0.00575209	0.00601106	0.041206	0.00620501
899	SEED	Motility and Chemotaxis	Flagellar motility in Prokaryota	Flagellar_motility	Flagellar biosynthesis protein FliR	0.0268589	0.044178	0	0.0240442	0	0.00620501
900	SEED	Motility and Chemotaxis	Bacterial_Chemotaxis	Chemotaxis protein CheD	Chemotaxis protein CheD	0.0313353	0.0189334	0.00575209	0.0180332	0.0137353	0
901	SEED	Motility and Chemotaxis	Flagellar motility in Prokaryota	Flagellum	Flagellar biosynthesis protein FliS	0.0179059	0.0189334	0	0.0180332	0.0274706	0
902	SEED	Motility and Chemotaxis	Flagellar motility in Prokaryota	Flagellum	Flagellar biosynthesis protein FliP	0.0134294	0.0189334	0.0115042	0.0120221	0.0137353	0
903	SEED	Nitrogen Metabolism	Ammonia_assimilation	Glutamate synthase [NADPH] large chain (EC 1.4.1.13)	Glutamate synthase [NADPH] large chain (EC 1.4.1.13), 6 4 7 4 4 66	0.277542	0.284001	0.431406	0.252465	0.315912	0.409531
904	SEED	Nitrogen Metabolism	Ammonia_assimilation	Glutamate synthase [NADPH] small chain (EC 1.4.1.13)	Glutamate synthase [NADPH] small chain (EC 1.4.1.13)	0.214871	0.145156	0.293356	0.216398	0.226633	0.16133
905	SEED	Nitrogen Metabolism	Ammonia_assimilation	Glutamine synthetase type III, GlnN (EC 6.3.1.2)	Glutamine synthetase type III, GlnN (EC 6.3.1.2)	0.188012	0.113601	0.327869	0.210387	0.164824	0.14892
906	SEED	Nitrogen Metabolism	Ammonia_assimilation	Glutamine synthetase type I (EC 6.3.1.2)	Glutamine synthetase type I (EC 6.3.1.2)	0.138771	0.16409	0.103538	0.132243	0.212897	0.11169
907	SEED	Nitrogen Metabolism	Ammonia_assimilation	Ammonium transporter	Ammonium transporter 1 3 1 24	0.0984825	0.0820448	0.201323	0.0540995	0.0961472	0.14892
908	SEED	Nitrogen Metabolism	Nitrosative_stress	Hydroxylamine reductase (EC 1.7.-.-)	Hydroxylamine reductase (EC 1.7.-.-)	0.0179059	0.0504891	0.149554	0.096177	0.0686766	0.0744602
909	SEED	Nitrogen Metabolism	Nitrate_and_nitrite_ammonification	Ferredoxin-type protein NapG (periplasmic nitrate reductase)	Ferredoxin-type protein NapG (periplasmic nitrate reductase), 10	0.0358118	0.0568003	0.0632729	0.0781438	0.020603	0.0620501
910	SEED	Nitrogen Metabolism	Ammonia_assimilation	Nitrogen regulatory protein P-II	Nitrogen regulatory protein P-II	0.0358118	0.0568003	0.0402646	0.0360664	0.0480736	0.018615
911	SEED	Nitrogen Metabolism	Denitrification	Nitric oxide reductase activation protein NorD	Nitric oxide reductase activation protein NorD	0.0223824	0.0189334	0.0230083	0.0360664	0.0343383	0.018615
912	SEED	Nitrogen Metabolism	Nitrate_and_nitrite_ammonification	Polyferredoxin NapH (periplasmic nitrate reductase)	Polyferredoxin NapH (periplasmic nitrate reductase), 1 3	0.0223824	0.0189334	0.0115042	0.0601106	0.0137353	0.018615
913	SEED	Nitrogen Metabolism	Nitrosative_stress	Hcp transcriptional regulator HcpR (Crp/Fnr family)	Hcp transcriptional regulator HcpR (Crp/Fnr family)	0.0134294	0.0126223	0.0517688	0.0240442	0.0137353	0.018615
914	SEED	Nitrogen Metabolism	Cyanate_hydrolysis	Cyn operon transcriptional activator	Cyn operon transcriptional activator	0.0179059	0.0189334	0.0402646	0.0180332	0.00686766	0.0248201
915	SEED	Nitrogen Metabolism	Nitric_oxide_synthase	Manganese superoxide dismutase (EC 1.15.1.1)	Manganese superoxide dismutase (EC 1.15.1.1)	0.0134294	0.0252446	0.0172563	0.00601106	0.020603	0.01241
916	SEED	Nitrogen Metabolism	Denitrification	Nitric oxide reductase activation protein NorQ	Nitric oxide reductase activation protein NorQ	0.0134294	0.0126223	0.0115042	0.0120221	0	0.018615
917	SEED	Nitrogen Metabolism	Nitrogen_fixation	Nitrogenase (molybdenum-iron) reductase and maturation protein NifH	Nitrogenase (molybdenum-iron) reductase and maturation protein NifH	0.0134294	0.044178	0	0	0	0.00620501
918	SEED	Nucleosides and Nucleotides	Purines	De_Novo_Purine_Biosynthesis	Amidophosphoribosyltransferase (EC 2.4.2.14)	0.214871	0.151467	0.368133	0.186343	0.260971	0.21097
919	SEED	Nucleosides and Nucleotides	Purines	Purine_conversions	GMP synthase [glutamine-hydrolyzing] (EC 6.3.5.2)	0.188012	0.189334	0.2761	0.28252	0.288442	0.142715
920	SEED	Nucleosides and Nucleotides	Ribonucleotide_reduction	Ribonucleotide reductase of class III (anaerobic), large subunit (EC 1.17.4.2)	Ribonucleotide reductase of class III (anaerobic), large subunit (EC 1.17.4.2)	0.219347	0.157778	0.207075	0.210387	0.226633	0.192355
921	SEED	Nucleosides and Nucleotides	Purines	Purine_conversions	Inosine-5'-monophosphate dehydrogenase (EC 1.1.1.205)	0.125341	0.138845	0.212827	0.156288	0.144221	0.21097
922	SEED	Nucleosides and Nucleotides	Purines	Purine_conversions	Deoxyguanosinetriphosphate triphosphohydrolase (EC 3.1.5.1)	0.196965	0.183023	0.10929	0.192354	0.0755443	0.17374
923	SEED	Nucleosides and Nucleotides	Purines	Purine_conversions	Adenylosuccinate lyase (EC 4.3.2.2)	0.1522	0.176712	0.0977854	0.16831	0.11675	0.19856
924	SEED	Nucleosides and Nucleotides	Ribonucleotide_reduction	Ribonucleotide reductase of class II (coenzyme B12-dependent) (EC 1.17.4.1)	Ribonucleotide reductase of class II (coenzyme B12-dependent) (EC 1.17.4.1)	0.094006	0.0757337	0.184067	0.096177	0.171692	0.18615
925	SEED	Nucleosides and Nucleotides	De_Novo_Pyrimidine_Synthesis	Dihydroorotase (EC 3.5.2.3)	Dihydroorotase (EC 3.5.2.3)	0.111912	0.183023	0.0747771	0.144265	0.123618	0.117895
926	SEED	Nucleosides and Nucleotides	Purines	De_Novo_Purine_Biosynthesis	Phosphoribosylamine--glycine ligase (EC 6.3.4.13)	0.094006	0.16409	0.120794	0.144265	0.123618	0.105485
927	SEED	Nucleosides and Nucleotides	Adenosyl_nucleosidases	Purine nucleoside phosphorylase (EC 2.4.2.1)	Purine nucleoside phosphorylase (EC 2.4.2.1) 1 2 23	0.107435	0.0631114	0.126546	0.0841548	0.130486	0.142715
928	SEED	Nucleosides and Nucleotides	Purines	De_Novo_Purine_Biosynthesis	Phosphoribosylaminoimidazole-succinocarboxamide synthase (EC 6.3.2.6)	0.111912	0.0757337	0.0345125	0.11421	0.137353	0.155125
929	SEED	Nucleosides and Nucleotides	De_Novo_Pyrimidine_Synthesis	Dihydroorotate dehydrogenase, catalytic subunit (EC 1.3.3.1)	Dihydroorotate dehydrogenase, catalytic subunit (EC 1.3.3.1)	0.111912	0.100978	0.120794	0.096177	0.0686766	0.130305
930	SEED	Nucleosides and Nucleotides	Purines	Purine_conversions	Polyphosphate kinase (EC 2.7.4.1)	0.116388	0.0568003	0.126546	0.0781438	0.0480736	0.19856
931	SEED	Nucleosides and Nucleotides	Purines	Purine_conversions	5'-nucleotidase (EC 3.1.3.5)	0.0671471	0.126223	0.0575209	0.126232	0.137353	0.0992802
932	SEED	Nucleosides and Nucleotides	De_Novo_Pyrimidine_Synthesis	Aspartate carbamoyltransferase (EC 2.1.3.2)	Aspartate carbamoyltransferase (EC 2.1.3.2) 1 2 1 2 12	0.094006	0.107289	0.126546	0.0661217	0.137353	0.0744602
933	SEED	Nucleosides and Nucleotides	Purines	De_Novo_Purine_Biosynthesis	Phosphoribosylformylglycinamidine cyclo-ligase (EC 6.3.3.1)	0.094006	0.0757337	0.0977854	0.126232	0.0755443	0.130305
934	SEED	Nucleosides and Nucleotides	De_Novo_Pyrimidine_Synthesis	Orotate phosphoribosyltransferase (EC 2.4.2.10)	Orotate phosphoribosyltransferase (EC 2.4.2.10)	0.085053	0.0883559	0.0920334	0.0661217	0.0892796	0.0868702
935	SEED	Nucleosides and Nucleotides	Purines	Purine_conversions	Adenylate kinase (EC 2.7.4.3)	0.0537177	0.044178	0.0805292	0.11421	0.103015	0.0930752
936	SEED	Nucleosides and Nucleotides	De_Novo_Pyrimidine_Synthesis	Orotidine 5'-phosphate decarboxylase (EC 4.1.1.23)	Orotidine 5'-phosphate decarboxylase (EC 4.1.1.23)	0.0895295	0.0757337	0.0747771	0.0721327	0.0892796	0.0744602
937	SEED	Nucleosides and Nucleotides	Purines	Xanthosine_utilization_(xap_region)	Xanthosine permease	0.0134294	0.0189334	0.0632729	0.120221	0.11675	0.105485
938	SEED	Nucleosides and Nucleotides	Detoxification.1	Nudix_proteins_(nucleoside_triphosphate_hydrolases)	Deoxyuridine 5'-triphosphate nucleotidohydrolase (EC 3.6.1.23)	0.0581942	0.0568003	0.103538	0.0360664	0.137353	0.0372301
939	SEED	Nucleosides and Nucleotides	Purines	Purine_conversions	Hypoxanthine-guanine phosphoribosyltransferase (EC 2.4.2.8)	0.0626707	0.0504891	0.0460167	0.0661217	0.041206	0.0868702
940	SEED	Nucleosides and Nucleotides	De_Novo_Pyrimidine_Synthesis	Dihydroorotate dehydrogenase electron transfer subunit (EC 1.3.3.1)	Dihydroorotate dehydrogenase electron transfer subunit (EC 1.3.3.1)	0.0671471	0.0378668	0.069025	0.0480885	0.0618089	0.0682552
941	SEED	Nucleosides and Nucleotides	Purines	De_Novo_Purine_Biosynthesis	Phosphoribosylaminoimidazole carboxylase catalytic subunit (EC 4.1.1.21)	0.0761001	0.0189334	0.0977854	0.0540995	0.0480736	0.0248201
942	SEED	Nucleosides and Nucleotides	Ribonucleotide_reduction	Ribonucleotide reductase of class III (anaerobic), activating protein (EC 1.97.1.4)	Ribonucleotide reductase of class III (anaerobic), activating protein (EC 1.97.1.4)	0.0492412	0.0757337	0.0460167	0.0300553	0.0755443	0.0372301
943	SEED	Nucleosides and Nucleotides	Purines	Purine_conversions	Adenine phosphoribosyltransferase (EC 2.4.2.7)	0.0671471	0.044178	0.0517688	0.0721327	0.0274706	0.0496401
944	SEED	Nucleosides and Nucleotides	Purines	De_Novo_Purine_Biosynthesis	Phosphoribosylglycinamide formyltransferase 2 (EC 2.1.2.-)	0.0134294	0.0126223	0.126546	0.0360664	0.0686766	0.0496401
945	SEED	Nucleosides and Nucleotides	Purines	De_Novo_Purine_Biosynthesis	Phosphoribosylglycinamide formyltransferase (EC 2.1.2.2)	0.0223824	0.0504891	0.0632729	0.102188	0.0137353	0.0496401
946	SEED	Nucleosides and Nucleotides	De_Novo_Pyrimidine_Synthesis	Uracil phosphoribosyltransferase (EC 2.4.2.9)	Uracil phosphoribosyltransferase (EC 2.4.2.9)	0.0179059	0.0694225	0.0575209	0.0480885	0.0686766	0.0310251
947	SEED	Nucleosides and Nucleotides	Purine_Utilization	Xanthine/uracil/thiamine/ascorbate permease family protein	Xanthine/uracil/thiamine/ascorbate permease family protein	0.0134294	0.0568003	0.0345125	0.0360664	0.0618089	0.0248201
948	SEED	Nucleosides and Nucleotides	Detoxification.1	Nudix_proteins_(nucleoside_triphosphate_hydrolases)	NADH pyrophosphatase (EC 3.6.1.22)	0.0268589	0.0252446	0.0287604	0.0601106	0.0686766	0.00620501
949	SEED	Nucleosides and Nucleotides	Purines	Purine_conversions	Guanine deaminase (EC 3.5.4.3)	0.0313353	0.044178	0.0115042	0.0360664	0.0618089	0.01241
950	SEED	Nucleosides and Nucleotides	Ribonucleotide_reduction	Ribonucleotide reductase transcriptional regulator NrdR	Ribonucleotide reductase transcriptional regulator NrdR	0.0134294	0.0315557	0.0402646	0.0601106	0.0274706	0.018615
951	SEED	Nucleosides and Nucleotides	Purines	De_Novo_Purine_Biosynthesis	YabJ, a purine regulatory protein and member of the highly conserved YjgF family	0.0447648	0.0252446	0.0345125	0.0300553	0.0274706	0.0248201
952	SEED	Nucleosides and Nucleotides	Detoxification.1	Nudix_proteins_(nucleoside_triphosphate_hydrolases)	Putative Nudix hydrolase YfcD (EC 3.6.-.-)	0.0358118	0.044178	0.0402646	0.00601106	0.020603	0.0372301
953	SEED	Nucleosides and Nucleotides	Purines	Purine_conversions	Adenine deaminase (EC 3.5.4.2)	0.0313353	0.00631114	0.0632729	0.0300553	0.041206	0
954	SEED	Nucleosides and Nucleotides	De_Novo_Pyrimidine_Synthesis	Uracil permease	Uracil permease	0.0223824	0.0631114	0.0460167	0.0120221	0.0137353	0.01241
955	SEED	Nucleosides and Nucleotides	Detoxification.1	Nudix_proteins_(nucleoside_triphosphate_hydrolases)	Mutator mutT protein (8-dihydro-8-oxoguanine-triphosphatase) (EC 3.6.1.-)	0.0537177	0.0126223	0.0345125	0.0180332	0.041206	0.00620501
956	SEED	Nucleosides and Nucleotides	Purine_Utilization	Xanthine dehydrogenase, molybdenum binding subunit (EC 1.17.1.4)	Xanthine dehydrogenase, molybdenum binding subunit (EC 1.17.1.4)	0.0223824	0.0378668	0.0172563	0.00601106	0.020603	0.0248201
957	SEED	Nucleosides and Nucleotides	De_Novo_Pyrimidine_Synthesis	Aspartate carbamoyltransferase regulatory chain (PyrI)	Aspartate carbamoyltransferase regulatory chain (PyrI)	0.0179059	0.044178	0	0.0240442	0	0.0248201
958	SEED	Nucleosides and Nucleotides	Purines	Purine_conversions	Nucleoside diphosphate kinase (EC 2.7.4.6)	0.0134294	0.0252446	0.00575209	0.0120221	0.0274706	0.0248201
959	SEED	Nucleosides and Nucleotides	Purine_Utilization	Xanthine permease	Xanthine permease	0.00895295	0.0315557	0.0402646	0.0120221	0	0
960	SEED	Nucleosides and Nucleotides	Purine_Utilization	Uracil-xanthine permease	Uracil-xanthine permease	0.0268589	0.00631114	0.00575209	0.0180332	0.020603	0.00620501
961	SEED	Nucleosides and Nucleotides	Purines	Purine_conversions	Adenosine deaminase (EC 3.5.4.4)	0	0.0189334	0.00575209	0.0300553	0.020603	0.00620501
962	SEED	Nucleosides and Nucleotides	Purines	Purine_conversions	Possible hypoxanthine oxidase XdhD (EC 1.-.-.-)	0.0268589	0.0189334	0	0.0120221	0.0137353	0.00620501
963	SEED	Nucleosides and Nucleotides	Hydantoin_metabolism	N-methylhydantoinase A (EC 3.5.2.14)	N-methylhydantoinase A (EC 3.5.2.14)	0.0134294	0.00631114	0.0287604	0	0.020603	0
964	SEED	Nucleosides and Nucleotides	Purines	Purine_conversions	Inosine-uridine preferring nucleoside hydrolase (EC 3.2.2.1)	0.00447648	0.0315557	0.00575209	0.0120221	0.0137353	0
965	SEED	Nucleosides and Nucleotides	Purine_Utilization	Xanthine and CO dehydrogenases maturation factor, XdhC/CoxF family	Xanthine and CO dehydrogenases maturation factor, XdhC/CoxF family	0.0134294	0.0189334	0	0	0.020603	0.01241
966	SEED	Nucleosides and Nucleotides	Purines	De_Novo_Purine_Biosynthesis	Phosphoribosylformylglycinamidine synthase, synthetase subunit (EC 6.3.5.3)	0	0	0.00575209	0.0300553	0.0274706	0
967	SEED	Nucleosides and Nucleotides	Detoxification.1	Nudix_proteins_(nucleoside_triphosphate_hydrolases)	Low G+C gram positive nudix hydrolase YtkD (EC 3.6.-.-)	0.0134294	0.00631114	0.00575209	0.00601106	0.00686766	0.0248201
968	SEED	Phages, Prophages, Transposable elements	Conjugative_transposon,_Bacteroidales	Conjugative transposon protein TraG	Conjugative transposon protein TraG	0.237253	0.22089	0.327869	0.300553	0.460133	0.459171
969	SEED	Phages, Prophages, Transposable elements	Conjugative_transposon,_Bacteroidales	Putative mobilization protein BF0133	Putative mobilization protein BF013	0.205918	0.208268	0.155306	0.222409	0.432663	0.366096
970	SEED	Phages, Prophages, Transposable elements	Conjugative_transposon,_Bacteroidales	Conjugative transposon protein TraM	Conjugative transposon protein TraM	0.0716236	0.0378668	0.069025	0.162299	0.219765	0.155125
971	SEED	Phages, Prophages, Transposable elements	Conjugative_transposon,_Bacteroidales	Conjugative transposon protein TraJ	Conjugative transposon protein TraJ	0.0492412	0.0694225	0.0805292	0.144265	0.178559	0.179945
972	SEED	Phages, Prophages, Transposable elements	Conjugative_transposon,_Bacteroidales	Putative conjugative transposon mobilization protein BF0132	Putative conjugative transposon mobilization protein BF013	0.0626707	0.126223	0.10929	0.096177	0.130486	0.167535
973	SEED	Phages, Prophages, Transposable elements	Conjugative_transposon,_Bacteroidales	Conjugative transposon protein TraN	Conjugative transposon protein TraN	0.0805766	0.0883559	0.0977854	0.120221	0.109883	0.155125
974	SEED	Phages, Prophages, Transposable elements	Conjugative_transposon,_Bacteroidales	Conjugative transposon protein TraA	Conjugative transposon protein TraA	0.085053	0.0757337	0.0632729	0.102188	0.0961472	0.17374
975	SEED	Phages, Prophages, Transposable elements	Staphylococcal_phi-Mu50B-like_prophages	Iron-sulfur cluster assembly protein SufB	Iron-sulfur cluster assembly protein SufB	0.0805766	0.119912	0.0920334	0.0540995	0.0892796	0.117895
976	SEED	Phages, Prophages, Transposable elements	Conjugative_transposon,_Bacteroidales	Conjugative transposon protein TraK	Conjugative transposon protein TraK	0.0537177	0.0820448	0.115042	0.0841548	0.103015	0.0806652
977	SEED	Phages, Prophages, Transposable elements	Conjugative_transposon,_Bacteroidales	Conjugative transposon protein TraI	Conjugative transposon protein TraI	0.0537177	0.0883559	0.0920334	0.0420774	0.0755443	0.0558451
978	SEED	Phages, Prophages, Transposable elements	Conjugative_transposon,_Bacteroidales	Conjugative transposon protein TraP	Conjugative transposon protein TraP	0.0268589	0.044178	0.069025	0.0180332	0.130486	0.0744602
979	SEED	Phages, Prophages, Transposable elements	Conjugative_transposon,_Bacteroidales	Conjugative transposon protein TraE	Conjugative transposon protein TraE	0.0268589	0.0378668	0.0345125	0.0300553	0.0755443	0.0868702
980	SEED	Phages, Prophages, Transposable elements	Bacteriophage structural proteins	Phage_capsid_proteins	Phage major capsid protein	0.0581942	0.0694225	0.0287604	0.0601106	0.0274706	0.0434351
981	SEED	Phages, Prophages, Transposable elements	Conjugative_transposon,_Bacteroidales	Conjugative transposon protein TraO	Conjugative transposon protein TraO	0.0447648	0.0252446	0.0287604	0.0300553	0.0755443	0.0806652
982	SEED	Phages, Prophages, Transposable elements	Conjugative_transposon,_Bacteroidales	hypothetical protein clusted with conjugative transposons, BF0131	hypothetical protein clusted with conjugative transposons, BF013	0.0313353	0.044178	0.0172563	0.0781438	0.0274706	0.0434351
983	SEED	Phages, Prophages, Transposable elements	Listeria_phi-A118-like_prophages	Repressor (CI-like) [Bacteriophage A118]	Repressor (CI-like) [Bacteriophage A118]	0.085053	0.0315557	0.0287604	0.0240442	0.0480736	0.01241
984	SEED	Phages, Prophages, Transposable elements	Conjugative_transposon,_Bacteroidales	Conjugative transposon protein TraQ	Conjugative transposon protein TraQ	0.0268589	0.0189334	0.0287604	0.0480885	0.0480736	0.0372301
985	SEED	Phages, Prophages, Transposable elements	Conjugative_transposon,_Bacteroidales	Conjugative transposon protein TraB	Conjugative transposon protein TraB5	0.0179059	0.00631114	0.0230083	0.0300553	0.0274706	0.0930752
986	SEED	Phages, Prophages, Transposable elements	IbrA_and_IbrB:_co-activators_of_prophage_gene_expression	Co-activator of prophage gene expression IbrA	Co-activator of prophage gene expression IbrA	0.0358118	0.0315557	0.0230083	0.0420774	0.0137353	0.018615
987	SEED	Phages, Prophages, Transposable elements	Staphylococcal_phi-Mu50B-like_prophages	Antirepressor [SA bacteriophages 11, Mu50B]	Antirepressor [SA bacteriophages 1 Mu50B]	0.0268589	0.0504891	0	0.0480885	0.0137353	0.01241
988	SEED	Phages, Prophages, Transposable elements	Listeria_phi-A118-like_prophages	Protein gp47, recombination-related [Bacteriophage A118]	Protein gp4 recombination-related [Bacteriophage A118]	0.0268589	0.0568003	0.0115042	0.0120221	0.020603	0.018615
989	SEED	Phages, Prophages, Transposable elements	Staphylococcal_phi-Mu50B-like_prophages	Phage terminase, large subunit [SA bacteriophages 11, Mu50B]	Phage terminase, large subunit [SA bacteriophages 1 Mu50B]	0.0179059	0.0315557	0.0287604	0.0240442	0.0274706	0.01241
990	SEED	Phages, Prophages, Transposable elements	Conjugative_transposon,_Bacteroidales	Conjugative transposon protein TraD	Conjugative transposon protein TraD	0.0268589	0.00631114	0.0115042	0.0120221	0.020603	0.018615
991	SEED	Phages, Prophages, Transposable elements	Bacteriophage structural proteins	Phage_capsid_proteins	Phage minor capsid protein	0.0358118	0.0126223	0.0172563	0.00601106	0.0137353	0.00620501
992	SEED	Phages, Prophages, Transposable elements	Tn552	Beta-lactamase (EC 3.5.2.6)	Beta-lactamase (EC 3.5.2.6)	0.0358118	0.0189334	0.0172563	0	0.00686766	0.01241
993	SEED	Phages, Prophages, Transposable elements	Conjugative_transposon,_Bacteroidales	Conjugative transposon protein TraF	Conjugative transposon protein TraF	0.00895295	0.00631114	0.0172563	0.0180332	0.020603	0.01241
994	SEED	Phages, Prophages, Transposable elements	Listeria_phi-A118-like_prophages	Lactobacillus delbrueckii phage mv4 main capsid protein Gp34 homolog lin2390	Lactobacillus delbrueckii phage mv4 main capsid protein Gp34 homolog lin239	0.0179059	0.0126223	0.00575209	0.00601106	0.0137353	0.01241
995	SEED	Phosphorus Metabolism	High_affinity_phosphate_transporter_and_control_of_PHO_regulon	Phosphate regulon sensor protein PhoR (EC 2.7.3.-)	Phosphate regulon sensor protein PhoR (EC 2.7.3.-)	0.156677	0.233512	0.178315	0.288531	0.157956	0.21097
996	SEED	Phosphorus Metabolism	Phosphate_metabolism	Sodium-dependent phosphate transporter	Sodium-dependent phosphate transporter	0.16563	0.170401	0.161058	0.120221	0.137353	0.21097
997	SEED	Phosphorus Metabolism	High_affinity_phosphate_transporter_and_control_of_PHO_regulon	Phosphate regulon transcriptional regulatory protein PhoB	Phosphate regulon transcriptional regulatory protein PhoB, 5 2 1 2 2	0.232777	0.157778	0.0920334	0.162299	0.123618	0.0744602
998	SEED	Phosphorus Metabolism	Phosphate_metabolism	Probable low-affinity inorganic phosphate transporter	Probable low-affinity inorganic phosphate transporter	0.0716236	0.0820448	0.0977854	0.0721327	0.164824	0.142715
999	SEED	Phosphorus Metabolism	Phosphate_metabolism	Alkaline phosphatase (EC 3.1.3.1)	Alkaline phosphatase (EC 3.1.3.1)	0.0716236	0.0504891	0.0977854	0.096177	0.11675	0.117895
1000	SEED	Phosphorus Metabolism	High_affinity_phosphate_transporter_and_control_of_PHO_regulon	Phosphate transport system regulatory protein PhoU	Phosphate transport system regulatory protein PhoU	0.125341	0.0883559	0.0920334	0.0661217	0.0686766	0.0620501
1001	SEED	Phosphorus Metabolism	Phosphate_metabolism	Phosphate starvation-inducible protein PhoH, predicted ATPase	Phosphate starvation-inducible protein PhoH, predicted ATPase 1 11	0.094006	0.0820448	0.0977854	0.0721327	0.0549413	0.0682552
1002	SEED	Phosphorus Metabolism	High_affinity_phosphate_transporter_and_control_of_PHO_regulon	Alkaline phosphatase synthesis transcriptional regulatory protein PhoP	Alkaline phosphatase synthesis transcriptional regulatory protein PhoP 1 1 10	0.111912	0.0757337	0.0517688	0.0781438	0.0480736	0.0620501
1003	SEED	Phosphorus Metabolism	High_affinity_phosphate_transporter_and_control_of_PHO_regulon	Phosphate transport ATP-binding protein PstB (TC 3.A.1.7.1)	Phosphate transport ATP-binding protein PstB (TC 3.A.1.7.1)	0.0716236	0.0504891	0.0575209	0.096177	0.0274706	0.0868702
1004	SEED	Phosphorus Metabolism	High_affinity_phosphate_transporter_and_control_of_PHO_regulon	Phosphate ABC transporter, periplasmic phosphate-binding protein PstS (TC 3.A.1.7.1)	Phosphate ABC transporter, periplasmic phosphate-binding protein PstS (TC 3.A.1.7.1)	0.0447648	0.0757337	0.0287604	0.0721327	0.0549413	0.0558451
1005	SEED	Phosphorus Metabolism	Phosphate_metabolism	FIG000233: metal-dependent hydrolase	FIG000233: metal-dependent hydrolase	0.0671471	0.0378668	0.0402646	0.0240442	0.0618089	0.0868702
1006	SEED	Phosphorus Metabolism	Phosphate_metabolism	Pyrophosphate-energized proton pump (EC 3.6.1.1)	Pyrophosphate-energized proton pump (EC 3.6.1.1)	0.0626707	0.044178	0.0230083	0.0300553	0.0618089	0.0930752
1007	SEED	Phosphorus Metabolism	Phosphate_metabolism	Manganese-dependent inorganic pyrophosphatase (EC 3.6.1.1)	Manganese-dependent inorganic pyrophosphatase (EC 3.6.1.1), 1 8	0.0358118	0.0315557	0.0402646	0.0661217	0.020603	0.0496401
1008	SEED	Phosphorus Metabolism	Phosphate_metabolism	Alkaline phosphatase like protein	Alkaline phosphatase like protein	0.0358118	0.0252446	0.00575209	0.0240442	0.0824119	0.0434351
1009	SEED	Phosphorus Metabolism	Phosphate_metabolism	Exopolyphosphatase (EC 3.6.1.11)	Exopolyphosphatase (EC 3.6.1.11)	0.0268589	0.0315557	0.0632729	0	0.041206	0.0434351
1010	SEED	Phosphorus Metabolism	Alkylphosphonate_utilization	Metal-dependent hydrolases of the beta-lactamase superfamily I	PhnP protein	0.0447648	0.0189334	0.0460167	0.0300553	0.0274706	0.0310251
1011	SEED	Phosphorus Metabolism	Phosphate_metabolism	DNA-binding response regulator, OmpR family	DNA-binding response regulator, OmpR family, 1 0	0.0134294	0.0126223	0.0115042	0.0661217	0.0274706	0
1012	SEED	Phosphorus Metabolism	Phosphonate_metabolism	2-aminoethylphosphonate:pyruvate aminotransferase (EC 2.6.1.37)	2-aminoethylphosphonate:pyruvate aminotransferase (EC 2.6.1.37)	0.00447648	0.0378668	0	0.0120221	0.00686766	0.0372301
1013	SEED	Phosphorus Metabolism	Phosphate_metabolism	Phosphate-specific outer membrane porin OprP	Phosphate-specific outer membrane porin OprP	0.00447648	0.0189334	0.00575209	0	0.00686766	0.0372301
1014	SEED	Phosphorus Metabolism	Phosphate_metabolism	Inorganic pyrophosphatase (EC 3.6.1.1)	Inorganic pyrophosphatase (EC 3.6.1.1)	0.00447648	0.00631114	0.0115042	0.0180332	0.0137353	0.018615
1015	SEED	Photosynthesis	Electron transport and photophosphorylation	Photosystem_I	photosystem I biogenesis protein BtpA	0.0223824	0.00631114	0	0	0.041206	0
1016	SEED	Potassium metabolism	Glutathione-regulated_potassium-efflux_system_and_associated_functions	Potassium efflux system KefA protein / Small-conductance mechanosensitive channel	Potassium efflux system KefA protein / Small-conductance mechanosensitive channel	0.0223824	0.0757337	0.0747771	0.102188	0.0549413	0.0744602
1017	SEED	Protein Metabolism	Protein biosynthesis	Translation_elongation_factor_G_family	Translation elongation factor G	0.335736	0.284001	0.41415	0.34263	0.2335	0.515016
1018	SEED	Protein Metabolism	Protein degradation	Proteolysis_in_bacteria,_ATP-dependent	ClpB protein	0.237253	0.176712	0.270348	0.288531	0.302177	0.19856
1019	SEED	Protein Metabolism	Protein biosynthesis	Universal_GTPases	GTP-binding protein TypA/BipA	0.259636	0.126223	0.224331	0.156288	0.20603	0.19856
1020	SEED	Protein Metabolism	Protein folding	Protein_chaperones	Chaperone protein HtpG	0.24173	0.170401	0.207075	0.186343	0.171692	0.192355
1021	SEED	Protein Metabolism	Protein biosynthesis	tRNA_aminoacylation,_Asp_and_Asn	Aspartyl-tRNA synthetase (EC 6.1.1.12)	0.143247	0.126223	0.161058	0.210387	0.199162	0.14892
1022	SEED	Protein Metabolism	Protein biosynthesis	Universal_GTPases	Translation elongation factor Tu	0.16563	0.195645	0.149554	0.144265	0.164824	0.167535
1023	SEED	Protein Metabolism	Protein biosynthesis	Ribosome_SSU_bacterial	SSU ribosomal protein S1p	0.129818	0.189334	0.184067	0.132243	0.171692	0.17374
1024	SEED	Protein Metabolism	Protein degradation	Proteolysis_in_bacteria,_ATP-dependent	ATP-dependent protease La (EC 3.4.21.53) Type I	0.116388	0.126223	0.235835	0.156288	0.185427	0.13651
1025	SEED	Protein Metabolism	Protein biosynthesis	tRNA_aminoacylation,_Glu_and_Gln	Glutaminyl-tRNA synthetase (EC 6.1.1.18)	0.129818	0.170401	0.218579	0.144265	0.123618	0.13651
1026	SEED	Protein Metabolism	Protein biosynthesis	tRNA_aminoacylation,_Glu_and_Gln	Glutamyl-tRNA synthetase (EC 6.1.1.17)	0.129818	0.126223	0.132298	0.138254	0.212897	0.179945
1027	SEED	Protein Metabolism	Protein degradation	Proteolysis_in_bacteria,_ATP-dependent	ATP-dependent Clp protease ATP-binding subunit ClpA	0.111912	0.0883559	0.16681	0.138254	0.212897	0.19856
1028	SEED	Protein Metabolism	Protein biosynthesis	Programmed_frameshift	Peptide chain release factor 2	0.143247	0.183023	0.13805	0.120221	0.151089	0.167535
1029	SEED	Protein Metabolism	Protein degradation	Proteolysis_in_bacteria,_ATP-dependent	ATP-dependent Clp protease ATP-binding subunit ClpX	0.107435	0.201956	0.13805	0.162299	0.130486	0.1241
1030	SEED	Protein Metabolism	Selenoproteins	Glycine_reductase,_sarcosine_reductase_and_betaine_reductase	Thioredoxin	0.143247	0.138845	0.13805	0.162299	0.109883	0.13651
1031	SEED	Protein Metabolism	Protein processing and modification	Ribosomal_protein_S12p_Asp_methylthiotransferase	tRNA-i(6)A37 methylthiotransferase	0.129818	0.145156	0.155306	0.108199	0.130486	0.13651
1032	SEED	Protein Metabolism	Protein biosynthesis	Universal_GTPases	GTP-binding protein EngA	0.107435	0.132534	0.132298	0.096177	0.171692	0.14892
1033	SEED	Protein Metabolism	Protein degradation	Proteolysis_in_bacteria,_ATP-dependent	ATP-dependent Clp protease, ATP-binding subunit ClpC	0.147724	0.170401	0.143802	0.120221	0.0618089	0.13651
1034	SEED	Protein Metabolism	Protein biosynthesis	Universal_GTPases	GTP-binding and nucleic acid-binding protein YchF	0.116388	0.151467	0.178315	0.126232	0.0961472	0.0930752
1035	SEED	Protein Metabolism	Protein degradation	Protein_degradation	Aminopeptidase C (EC 3.4.22.40)	0.0671471	0.0504891	0.115042	0.16831	0.157956	0.19856
1036	SEED	Protein Metabolism	Protein processing and modification	N-linked_Glycosylation_in_Bacteria	UDP-N-acetylglucosamine 6-dehydratase (EC 4.2.1.-)	0.147724	0.0946671	0.103538	0.162299	0.0686766	0.167535
1037	SEED	Protein Metabolism	Protein biosynthesis	tRNA_aminoacylation,_Asp_and_Asn	Asparaginyl-tRNA synthetase (EC 6.1.1.22)	0.0805766	0.0946671	0.149554	0.144265	0.130486	0.13651
1038	SEED	Protein Metabolism	Protein biosynthesis	Universal_GTPases	GTP-binding protein Era	0.179059	0.113601	0.126546	0.126232	0.0755443	0.105485
1039	SEED	Protein Metabolism	Protein processing and modification	Ribosomal_protein_S12p_Asp_methylthiotransferase	Ribosomal protein S12p Asp88 (E. coli) methylthiotransferase	0.125341	0.0568003	0.13805	0.132243	0.164824	0.0992802
1040	SEED	Protein Metabolism	Protein biosynthesis	Universal_GTPases	COG0536: GTP-binding protein Obg	0.107435	0.0820448	0.149554	0.132243	0.123618	0.105485
1041	SEED	Protein Metabolism	Protein biosynthesis	Universal_GTPases	GTPase and tRNA-U34 5-formylation enzyme TrmE	0.134294	0.145156	0.0517688	0.150277	0.0892796	0.117895
1042	SEED	Protein Metabolism	Protein biosynthesis	Ribosome_biogenesis_bacterial	Ribosomal large subunit pseudouridine synthase D (EC 4.2.1.70)	0.094006	0.126223	0.132298	0.0841548	0.151089	0.0992802
1043	SEED	Protein Metabolism	Protein biosynthesis	Universal_GTPases	Signal recognition particle, subunit Ffh SRP54 (TC 3.A.5.1.1)	0.102959	0.0757337	0.184067	0.0781438	0.109883	0.117895
1044	SEED	Protein Metabolism	Protein biosynthesis	Ribosome_LSU_bacterial	LSU ribosomal protein L2p (L8e)	0.116388	0.044178	0.0862813	0.144265	0.109883	0.0930752
1045	SEED	Protein Metabolism	Protein degradation	Proteolysis_in_bacteria,_ATP-dependent	ATP-dependent Clp protease proteolytic subunit (EC 3.4.21.92)	0.116388	0.119912	0.0575209	0.0901659	0.041206	0.0806652
1046	SEED	Protein Metabolism	Protein biosynthesis	Universal_GTPases	Ribosome small subunit-stimulated GTPase EngC	0.085053	0.0946671	0.069025	0.132243	0.0480736	0.0744602
1047	SEED	Protein Metabolism	Protein biosynthesis	Ribosome_LSU_bacterial	LSU ribosomal protein L3p (L3e)	0.0805766	0.100978	0.0460167	0.0721327	0.041206	0.155125
1048	SEED	Protein Metabolism	Protein biosynthesis	Ribosome_SSU_bacterial	SSU ribosomal protein S3p (S3e)	0.0581942	0.0378668	0.0805292	0.150277	0.123618	0.0372301
1049	SEED	Protein Metabolism	Protein biosynthesis	Ribosome_SSU_bacterial	SSU ribosomal protein S2p (SAe)	0.0581942	0.0820448	0.0805292	0.0901659	0.130486	0.0434351
1050	SEED	Protein Metabolism	Protein biosynthesis	Universal_GTPases	Signal recognition particle receptor protein FtsY (=alpha subunit) (TC 3.A.5.1.1)	0.0984825	0.107289	0.0805292	0.0540995	0.0480736	0.0930752
1051	SEED	Protein Metabolism	Protein processing and modification	N-linked_Glycosylation_in_Bacteria	4-keto-6-deoxy-N-Acetyl-D-hexosaminyl-(Lipid carrier) aminotransferase	0.0761001	0.0694225	0.0460167	0.096177	0.11675	0.0744602
1052	SEED	Protein Metabolism	Protein biosynthesis	Ribosome_LSU_bacterial	LSU ribosomal protein L17p	0.0447648	0.0504891	0.126546	0.0420774	0.109883	0.0806652
1053	SEED	Protein Metabolism	Protein processing and modification	Inteins	intein-containing	0.0537177	0.107289	0.0632729	0.096177	0.0824119	0.0434351
1054	SEED	Protein Metabolism	Protein biosynthesis	Ribosome_LSU_bacterial	LSU ribosomal protein L16p (L10e)	0.0581942	0.0757337	0.13805	0.0420774	0.0824119	0.0496401
1055	SEED	Protein Metabolism	Protein biosynthesis	Translation_elongation_factor_G_family	Tetracycline resistance protein TetP	0.0895295	0.100978	0.0862813	0.0781438	0.0549413	0.0310251
1056	SEED	Protein Metabolism	Protein biosynthesis	Ribosome_biogenesis_bacterial	Dimethyladenosine transferase (EC 2.1.1.-)	0.0492412	0.0757337	0.0805292	0.0540995	0.103015	0.0744602
1057	SEED	Protein Metabolism	Protein biosynthesis	Ribosome_biogenesis_bacterial	LSU m5C1962 methyltransferase RlmI	0.0537177	0.0631114	0.0517688	0.0420774	0.123618	0.0868702
1058	SEED	Protein Metabolism	Protein biosynthesis	Universal_GTPases	GTP-binding protein EngB	0.0716236	0.0883559	0.069025	0.0480885	0.0549413	0.0744602
1059	SEED	Protein Metabolism	Protein biosynthesis	Ribosome_LSU_bacterial	LSU ribosomal protein L11p (L12e)	0.0805766	0.0504891	0.0977854	0.0420774	0.041206	0.0744602
1060	SEED	Protein Metabolism	Protein biosynthesis	Translation_elongation_factor_G_family	Translation elongation factor G-related protein	0.094006	0.044178	0.0345125	0.0420774	0.0755443	0.0868702
1061	SEED	Protein Metabolism	Protein degradation	Proteasome_bacterial	Site-specific tyrosine recombinase	0.094006	0.0883559	0.0805292	0.0240442	0.0343383	0.0558451
1062	SEED	Protein Metabolism	Protein biosynthesis	Ribosome_LSU_bacterial	LSU ribosomal protein L1p (L10Ae)	0.0581942	0.0568003	0.0920334	0.0601106	0.0892796	0.018615
1063	SEED	Protein Metabolism	Protein biosynthesis	Ribosome_SSU_bacterial	SSU ribosomal protein S15p (S13e)	0.0492412	0.044178	0.0632729	0.0601106	0.0686766	0.0806652
1064	SEED	Protein Metabolism	Protein biosynthesis	Ribosome_LSU_bacterial	LSU ribosomal protein L4p (L1e)	0.0537177	0.0504891	0.0517688	0.096177	0.0274706	0.0744602
1065	SEED	Protein Metabolism	Protein biosynthesis	Ribosome_SSU_bacterial	SSU ribosomal protein S5p (S2e)	0.0447648	0.044178	0.115042	0.0420774	0.0480736	0.0496401
1066	SEED	Protein Metabolism	Protein biosynthesis	Ribosome_SSU_bacterial	SSU ribosomal protein S12p (S23e)	0.0402883	0.0378668	0.0402646	0.0540995	0.0755443	0.0930752
1067	SEED	Protein Metabolism	Protein processing and modification	Ribosomal_protein_S12p_Asp_methylthiotransferase	SSU ribosomal protein S12p (S23e)	0.0402883	0.0378668	0.0402646	0.0540995	0.0755443	0.0930752
1068	SEED	Protein Metabolism	Protein degradation	Protein_degradation	Deblocking aminopeptidase (EC 3.4.11.-)	0.0805766	0.0315557	0.0287604	0.096177	0.041206	0.0620501
1069	SEED	Protein Metabolism	Protein biosynthesis	Ribosome_biogenesis_bacterial	Inactive homolog of metal-dependent proteases, putative molecular chaperone	0.0492412	0.0504891	0.0460167	0.0721327	0.0824119	0.0310251
1070	SEED	Protein Metabolism	Protein biosynthesis	Ribosome_SSU_bacterial	SSU ribosomal protein S13p (S18e)	0.0447648	0.0694225	0.0862813	0.0480885	0.0480736	0.0310251
1071	SEED	Protein Metabolism	Protein biosynthesis	Translation_elongation_factors_eukaryotic_and_archaeal	Translation elongation factor P	0.0537177	0.0504891	0.0517688	0.0661217	0.0549413	0.0496401
1072	SEED	Protein Metabolism	Protein biosynthesis	Ribosome_LSU_bacterial	LSU ribosomal protein L5p (L11e)	0.0492412	0.0252446	0.0345125	0.0480885	0.0755443	0.0930752
1073	SEED	Protein Metabolism	Protein biosynthesis	Ribosome_biogenesis_bacterial	LSU m3Psi1915 methyltransferase RlmH	0.0447648	0.0568003	0.069025	0.0360664	0.0618089	0.0558451
1074	SEED	Protein Metabolism	Protein biosynthesis	Ribosome_SSU_bacterial	SSU ribosomal protein S6p	0.0223824	0.0378668	0.0805292	0.0540995	0.041206	0.0806652
1075	SEED	Protein Metabolism	Protein biosynthesis	Ribosome_SSU_bacterial	SSU ribosomal protein S4p (S9e)	0.0761001	0.0378668	0.0862813	0.0180332	0.0618089	0.0310251
1076	SEED	Protein Metabolism	Protein biosynthesis	Ribosome_SSU_bacterial	SSU ribosomal protein S10p (S20e)	0.0537177	0.0504891	0.0575209	0.0420774	0.0618089	0.0434351
1077	SEED	Protein Metabolism	Protein folding	Peptidyl-prolyl_cis-trans_isomerase	FKBP-type peptidyl-prolyl cis-trans isomerase fklB (EC 5.2.1.8)	0.0358118	0.0694225	0.0287604	0.0601106	0.0618089	0.0496401
1078	SEED	Protein Metabolism	Protein biosynthesis	Ribosome_SSU_bacterial	SSU ribosomal protein S11p (S14e)	0.0716236	0.0189334	0.0575209	0.0601106	0.041206	0.0434351
1079	SEED	Protein Metabolism	Protein biosynthesis	Ribosome_SSU_bacterial	SSU ribosomal protein S7p (S5e)	0.0358118	0.0378668	0.0575209	0.0721327	0.0549413	0.0310251
1080	SEED	Protein Metabolism	Protein degradation	Protein_degradation	Aminopeptidase YpdF (MP-, MA-, MS-, AP-, NP- specific)	0.0581942	0.0631114	0.0172563	0.0480885	0.0755443	0.0248201
1081	SEED	Protein Metabolism	Protein biosynthesis	Ribosome_LSU_bacterial	LSU ribosomal protein L6p (L9e)	0.0492412	0.0315557	0.0402646	0.0601106	0.0618089	0.0434351
1082	SEED	Protein Metabolism	Protein biosynthesis	Ribosome_LSU_bacterial	LSU ribosomal protein L15p (L27Ae)	0.0716236	0.0378668	0.0517688	0.0240442	0.0343383	0.0620501
1083	SEED	Protein Metabolism	Protein biosynthesis	Ribosome_SSU_bacterial	SSU ribosomal protein S8p (S15Ae)	0.085053	0.0378668	0.0517688	0.0360664	0.041206	0.0248201
1084	SEED	Protein Metabolism	Protein biosynthesis	Ribosome_SSU_bacterial	SSU ribosomal protein S9p (S16e)	0.0626707	0.0568003	0.0402646	0.0360664	0.0549413	0.0248201
1085	SEED	Protein Metabolism	Protein biosynthesis	Ribosome_LSU_bacterial	LSU ribosomal protein L20p	0.0402883	0.0568003	0.0517688	0.0180332	0.0686766	0.0372301
1086	SEED	Protein Metabolism	Protein biosynthesis	Ribosome_LSU_bacterial	LSU ribosomal protein L10p (P0)	0.0537177	0.0378668	0.0517688	0.0360664	0.0549413	0.0372301
1087	SEED	Protein Metabolism	Protein biosynthesis	Ribosome_SSU_bacterial	SSU ribosomal protein S16p	0.0358118	0.044178	0.0172563	0.102188	0.0343383	0.0372301
1088	SEED	Protein Metabolism	Protein biosynthesis	Ribosome_biogenesis_bacterial	Ribosomal large subunit pseudouridine synthase C (EC 4.2.1.70)	0.0805766	0.0568003	0.0575209	0.0180332	0.020603	0.0372301
1089	SEED	Protein Metabolism	Protein folding	Peptidyl-prolyl_cis-trans_isomerase	Survival protein SurA precursor (Peptidyl-prolyl cis-trans isomerase SurA) (EC 5.2.1.8)	0.0313353	0.0315557	0.132298	0.0300553	0.0137353	0.0310251
1090	SEED	Protein Metabolism	Protein biosynthesis	Universal_GTPases	50S ribosomal subunit maturation GTPase RbgA (B. subtilis YlqF)	0.085053	0.0315557	0.0517688	0.0240442	0.020603	0.0434351
1091	SEED	Protein Metabolism	Protein biosynthesis	Ribosome_LSU_bacterial	LSU ribosomal protein L21p	0.0358118	0.0315557	0.0115042	0.0540995	0.0686766	0.0496401
1092	SEED	Protein Metabolism	Protein biosynthesis	Ribosome_LSU_bacterial	LSU ribosomal protein L19p	0.0358118	0.0568003	0.069025	0.0360664	0.020603	0.0310251
1093	SEED	Protein Metabolism	Protein biosynthesis	Ribosome_LSU_bacterial	LSU ribosomal protein L14p (L23e)	0.0268589	0.0126223	0.0287604	0.096177	0.041206	0.0434351
1094	SEED	Protein Metabolism	Protein biosynthesis	Ribosome_SSU_bacterial	SSU ribosomal protein S19p (S15e)	0.0447648	0.0252446	0.0517688	0.0300553	0.0137353	0.0806652
1095	SEED	Protein Metabolism	Protein biosynthesis	Translation_elongation_factor_G_family	Ribosome protection-type tetracycline resistance related proteins, group 2	0.0626707	0.0757337	0.0230083	0.0360664	0.0343383	0.01241
1096	SEED	Protein Metabolism	Protein processing and modification	N-linked_Glycosylation_in_Bacteria	Phospholipid-lipopolysaccharide ABC transporter	0.0402883	0.113601	0.0115042	0.0540995	0.020603	0
1097	SEED	Protein Metabolism	Protein biosynthesis	Ribosome_LSU_bacterial	LSU ribosomal protein L13p (L13Ae)	0.0223824	0.0504891	0.0402646	0.0360664	0.0343383	0.0496401
1098	SEED	Protein Metabolism	Protein biosynthesis	Ribosome_LSU_bacterial	LSU ribosomal protein L27p	0.0358118	0.0252446	0.0575209	0.0300553	0.0274706	0.0558451
1099	SEED	Protein Metabolism	Protein biosynthesis	Ribosome_SSU_bacterial	SSU ribosomal protein S17p (S11e)	0.0447648	0.0189334	0.069025	0.0180332	0.0274706	0.0434351
1100	SEED	Protein Metabolism	Protein biosynthesis	Ribosome_activity_modulation	Ribosomal subunit interface protein	0.0626707	0.0504891	0.0172563	0.0180332	0.0343383	0.0372301
1101	SEED	Protein Metabolism	Protein biosynthesis	Ribosome_LSU_bacterial	LSU ribosomal protein L18p (L5e)	0.0492412	0.044178	0.069025	0.0300553	0.0137353	0.01241
1102	SEED	Protein Metabolism	Protein biosynthesis	Ribosome_LSU_bacterial	LSU ribosomal protein L31p	0.0358118	0.0252446	0.0632729	0.0540995	0.00686766	0.0248201
1103	SEED	Protein Metabolism	Secretion	Twin-arginine_translocation_system	Twin-arginine translocation protein TatC	0.0223824	0.0631114	0.0575209	0.0120221	0.0343383	0.018615
1104	SEED	Protein Metabolism	Protein folding	GroEL_GroES	Heat shock protein 60 family co-chaperone GroES	0.0134294	0.0252446	0.0345125	0.0360664	0.0274706	0.0620501
1105	SEED	Protein Metabolism	Protein biosynthesis	Ribosome_LSU_bacterial	LSU ribosomal protein L32p	0.0358118	0.00631114	0.0402646	0.0420774	0.020603	0.0434351
1106	SEED	Protein Metabolism	Protein biosynthesis	Ribosome_SSU_bacterial	SSU ribosomal protein S14p (S29e)	0.0179059	0.044178	0.0287604	0.0360664	0.0274706	0.0310251
1107	SEED	Protein Metabolism	Protein biosynthesis	Ribosome_biogenesis_bacterial	16S rRNA processing protein RimM	0.0447648	0.0315557	0.0460167	0.0360664	0.0137353	0.01241
1108	SEED	Protein Metabolism	Protein biosynthesis	Ribosome_LSU_bacterial	LSU ribosomal protein L23p (L23Ae)	0.0223824	0.0568003	0.0287604	0.0180332	0.0274706	0.0310251
1109	SEED	Protein Metabolism	Protein degradation	Protein_degradation	Oligopeptidase A (EC 3.4.24.70)	0.0179059	0.0126223	0.0230083	0.0360664	0.0480736	0.0434351
1110	SEED	Protein Metabolism	Protein biosynthesis	Ribosome_biogenesis_bacterial	Ribosomal-protein-S5p-alanine acetyltransferase	0.0223824	0.0189334	0.0402646	0.0420774	0.0343383	0.018615
1111	SEED	Protein Metabolism	Protein biosynthesis	Ribosome_LSU_bacterial	LSU ribosomal protein L24p (L26e)	0.0447648	0.0504891	0.0287604	0.00601106	0.020603	0.0248201
1112	SEED	Protein Metabolism	Protein biosynthesis	Ribosome_LSU_bacterial	LSU ribosomal protein L9p	0.0581942	0.0126223	0.0115042	0.0480885	0.0137353	0.0310251
1113	SEED	Protein Metabolism	Protein biosynthesis	Ribosome_SSU_bacterial	SSU ribosomal protein S21p	0.0402883	0.0315557	0.069025	0.00601106	0.020603	0.00620501
1114	SEED	Protein Metabolism	Protein biosynthesis	Ribosome_LSU_bacterial	LSU ribosomal protein L22p (L17e)	0.0492412	0.0378668	0.0115042	0.0420774	0.00686766	0.0248201
1115	SEED	Protein Metabolism	Protein biosynthesis	Ribosome_LSU_bacterial	LSU ribosomal protein L28p	0.00895295	0.0126223	0.0632729	0.0180332	0.020603	0.0434351
1116	SEED	Protein Metabolism	Protein biosynthesis	Ribosome_SSU_bacterial	SSU ribosomal protein S20p	0.0223824	0.0378668	0.0230083	0.0300553	0.0343383	0.018615
1117	SEED	Protein Metabolism	Protein processing and modification	N-linked_Glycosylation_in_Bacteria	Alpha-4-N-acetylgalactosamine transferase PglH (EC 2.4.1.-)	0.0313353	0.044178	0.0460167	0.0240442	0	0.018615
1118	SEED	Protein Metabolism	Protein processing and modification	N-linked_Glycosylation_in_Bacteria	Lipid carrier : UDP-N-acetylgalactosaminyltransferase (EC 2.4.1.-)	0.00447648	0.0378668	0.0402646	0.0300553	0.00686766	0.0434351
1119	SEED	Protein Metabolism	Protein biosynthesis	Ribosome_biogenesis_bacterial	RNA pseudouridylate synthase, group 1	0.0268589	0.0252446	0.0230083	0.0180332	0.0343383	0.0310251
1120	SEED	Protein Metabolism	Selenoproteins	Selenocysteine_metabolism	selenocysteine-containing	0.0179059	0	0.0230083	0.0180332	0.0343383	0.0558451
1121	SEED	Protein Metabolism	Protein biosynthesis	Ribosome_LSU_bacterial	LSU ribosomal protein L33p	0.0268589	0.0252446	0.0402646	0	0.0343383	0.018615
1122	SEED	Protein Metabolism	Protein biosynthesis	Universal_GTPases	Probable GTPase related to EngC	0.00895295	0.0315557	0.0172563	0.0120221	0.0343383	0.0310251
1123	SEED	Protein Metabolism	Protein degradation	Protein_degradation	Asp-X dipeptidase	0.0179059	0.00631114	0.0172563	0.0300553	0.00686766	0.0496401
1124	SEED	Protein Metabolism	Protein biosynthesis	Ribosome_LSU_bacterial	LSU ribosomal protein L34p	0.00895295	0.00631114	0.0230083	0.0360664	0.0274706	0.0248201
1125	SEED	Protein Metabolism	Protein biosynthesis	Ribosome_LSU_bacterial	LSU ribosomal protein L29p (L35e)	0	0.0504891	0.0402646	0	0.0274706	0.00620501
1126	SEED	Protein Metabolism	Protein biosynthesis	Ribosome_LSU_bacterial	LSU ribosomal protein L25p	0.0179059	0.0189334	0.0345125	0.0180332	0.0137353	0.01241
1127	SEED	Protein Metabolism	Protein biosynthesis	Ribosome_activity_modulation	Ribosome hibernation protein YhbH	0.0134294	0.00631114	0.0115042	0.0300553	0.0343383	0.018615
1128	SEED	Protein Metabolism	Selenoproteins	Selenocysteine_metabolism	Selenocysteine-specific translation elongation factor	0.0223824	0.0189334	0.00575209	0.0480885	0	0.018615
1129	SEED	Protein Metabolism	Protein biosynthesis	Ribosome_LSU_bacterial	LSU ribosomal protein L36p	0.00895295	0.00631114	0.0115042	0.0540995	0.00686766	0.0248201
1130	SEED	Protein Metabolism	Protein biosynthesis	Ribosome_LSU_bacterial	LSU ribosomal protein L35p	0.0223824	0.0568003	0	0.00601106	0.020603	0.00620501
1131	SEED	Protein Metabolism	Protein folding	Peptidyl-prolyl_cis-trans_isomerase	Foldase protein PrsA precursor (EC 5.2.1.8)	0.0179059	0.0378668	0.0115042	0.0180332	0.0137353	0.01241
1132	SEED	Protein Metabolism	Protein biosynthesis	Ribosome_biogenesis_bacterial	Ribosomal-protein-L7p-serine acetyltransferase	0.0179059	0.0189334	0.0230083	0.0300553	0	0.018615
1133	SEED	Protein Metabolism	Protein processing and modification	N-linked_Glycosylation_in_Bacteria	Alpha-3-N-acetylgalactosamine transferase PglA (EC 2.4.1.-)	0.00895295	0.0189334	0	0.0180332	0.0343383	0.01241
1134	SEED	Protein Metabolism	Protein processing and modification	N-linked_Glycosylation_in_Bacteria	Alpha-4-N-acetylgalactosamine transferase PglJ (EC 2.4.1.-)	0.0313353	0.0252446	0	0.00601106	0.0137353	0.01241
1135	SEED	Protein Metabolism	Protein biosynthesis	Ribosome_biogenesis_bacterial	Ribosomal large subunit pseudouridine synthase A (EC 4.2.1.70)	0.00447648	0.00631114	0	0.0300553	0.020603	0.0248201
1136	SEED	Protein Metabolism	Protein biosynthesis	Translation_elongation_factor_G_family	Tetracycline resistance protein TetQ	0.0134294	0.0126223	0	0.00601106	0.041206	0.01241
1137	SEED	Protein Metabolism	Protein biosynthesis	Ribosome_biogenesis_bacterial	Similar to ribosomal large subunit pseudouridine synthase D, Bacillus subtilis YjbO type	0.0268589	0.0252446	0.0115042	0.0180332	0	0
1138	SEED	Protein Metabolism	Protein processing and modification	N-linked_Glycosylation_in_Bacteria	4-amino-6-deoxy-N-Acetyl-D-hexosaminyl-(Lipid carrier) acetyltrasferase	0	0.0189334	0.00575209	0.0360664	0.00686766	0.00620501
1139	SEED	Protein Metabolism	Protein biosynthesis	Ribosome_LSU_bacterial	LSU ribosomal protein L30p (L7e)	0.00895295	0.0126223	0.0115042	0.0180332	0.020603	0
1140	SEED	Protein Metabolism	Protein biosynthesis	Translation_elongation_factor_G_family	Tetracycline resistance protein TetO	0.00447648	0.0189334	0.00575209	0.0360664	0	0
1141	SEED	Regulation and Cell signaling	Stringent_Response,_(p)ppGpp_metabolism	GTP pyrophosphokinase (EC 2.7.6.5), (p)ppGpp synthetase I	GTP pyrophosphokinase (EC 2.7.6.5), (p)ppGpp synthetase I	0.16563	0.16409	0.16681	0.16831	0.219765	0.229586
1142	SEED	Regulation and Cell signaling	Two-component_regulatory_systems_in_Campylobacter	Putative two-component response regulator	Putative two-component response regulator	0.188012	0.27769	0.0977854	0.126232	0.199162	0.0806652
1143	SEED	Regulation and Cell signaling	Stringent_Response,_(p)ppGpp_metabolism	GTP pyrophosphokinase (EC 2.7.6.5), (p)ppGpp synthetase II	GTP pyrophosphokinase (EC 2.7.6.5), (p)ppGpp synthetase II	0.085053	0.100978	0.16681	0.11421	0.130486	0.241996
1144	SEED	Regulation and Cell signaling	Sex_pheromones_in_Enterococcus_faecalis_and_other_Firmicutes	Membrane-associated zinc metalloprotease	Membrane-associated zinc metalloprotease	0.143247	0.0946671	0.149554	0.0841548	0.0824119	0.179945
1145	SEED	Regulation and Cell signaling	Two-component_regulatory_systems_in_Campylobacter	Putative two-component sensor histidine kinase	Putative two-component sensor histidine kinase	0.0805766	0.100978	0.0460167	0.108199	0.0274706	0.105485
1146	SEED	Regulation and Cell signaling	cAMP_signaling_in_bacteria	cAMP-binding proteins - catabolite gene activator and regulatory subunit of cAMP-dependent protein kinases	cAMP-binding proteins - catabolite gene activator and regulatory subunit of cAMP-dependent protein kinases	0.0626707	0.0568003	0.0402646	0.0721327	0.0618089	0.0992802
1147	SEED	Regulation and Cell signaling	Sex_pheromones_in_Enterococcus_faecalis_and_other_Firmicutes	Lipoprotein signal peptidase (EC 3.4.23.36)	Lipoprotein signal peptidase (EC 3.4.23.36)	0.0716236	0.0568003	0.0287604	0.0300553	0.0961472	0.0372301
1148	SEED	Regulation and Cell signaling	Programmed Cell Death and Toxin-antitoxin Systems	MazEF_toxin-antitoxing_(programmed_cell_death)_system	Programmed cell death toxin YdcE	0.0671471	0.0757337	0.0402646	0.0360664	0.0274706	0.0434351
1149	SEED	Regulation and Cell signaling	Programmed Cell Death and Toxin-antitoxin Systems	Murein_hydrolase_regulation_and_cell_death	Cytidine deaminase (EC 3.5.4.5)	0.0671471	0.0631114	0.0287604	0.0240442	0.041206	0.0372301
1150	SEED	Regulation and Cell signaling	cAMP_signaling_in_bacteria	Prophage Clp protease-like protein	Prophage Clp protease-like protein	0.0716236	0.0315557	0.0575209	0.0360664	0.0343383	0.00620501
1151	SEED	Regulation and Cell signaling	Programmed Cell Death and Toxin-antitoxin Systems	Murein_hydrolase_regulation_and_cell_death	LrgA-associated membrane protein LrgB	0.0179059	0.0252446	0.0345125	0.0480885	0.0618089	0.0434351
1152	SEED	Regulation and Cell signaling	Sex_pheromones_in_Enterococcus_faecalis_and_other_Firmicutes	Hypothetical similar to thiamin biosynthesis lipoprotein ApbE	Hypothetical similar to thiamin biosynthesis lipoprotein ApbE	0.0581942	0.0378668	0.0402646	0.0300553	0.020603	0.01241
1153	SEED	Regulation and Cell signaling	cAMP_signaling_in_bacteria	Adenylate cyclase (EC 4.6.1.1)	Adenylate cyclase (EC 4.6.1.1)	0.0358118	0.0504891	0.0115042	0.0300553	0.0137353	0.0310251
1154	SEED	Regulation and Cell signaling	Sex_pheromones_in_Enterococcus_faecalis_and_other_Firmicutes	Heptaprenyl diphosphate synthase component I (EC 2.5.1.30)	Heptaprenyl diphosphate synthase component I (EC 2.5.1.30)	0.0313353	0.0126223	0.0287604	0.0360664	0.0137353	0.01241
1155	SEED	Regulation and Cell signaling	Antibacterial peptides	Bacteriocin-like_peptides_Blp	Lactacin F ABC transporter permease component	0.0134294	0.00631114	0.0115042	0.0360664	0	0.0558451
1156	SEED	Regulation and Cell signaling	Programmed Cell Death and Toxin-antitoxin Systems	Murein_hydrolase_regulation_and_cell_death	Autolysis response regulater LytR	0.0447648	0.0315557	0.00575209	0.0180332	0.00686766	0.01241
1157	SEED	Regulation and Cell signaling	Two-component_regulatory_systems_in_Campylobacter	Positive regulator of CheA protein activity (CheW)	Positive regulator of CheA protein activity (CheW)	0.0402883	0.0315557	0	0.0180332	0.0137353	0.00620501
1158	SEED	Regulation and Cell signaling	Programmed Cell Death and Toxin-antitoxin Systems	Murein_hydrolase_regulation_and_cell_death	Autolysis histidine kinase LytS	0.00447648	0.0189334	0.0230083	0.0300553	0.0137353	0.01241
1159	SEED	Regulation and Cell signaling	Programmed Cell Death and Toxin-antitoxin Systems	Murein_hydrolase_regulation_and_cell_death	LysR family regulatory protein CidR	0.00895295	0.0126223	0.0230083	0.00601106	0.020603	0.01241
1160	SEED	Regulation and Cell signaling	Programmed Cell Death and Toxin-antitoxin Systems	Murein_hydrolase_regulation_and_cell_death	Antiholin-like protein LrgA	0.00447648	0.0252446	0.00575209	0.0180332	0.00686766	0.018615
1161	SEED	Regulation and Cell signaling	Programmed Cell Death and Toxin-antitoxin Systems	Murein_hydrolase_regulation_and_cell_death	S-layer protein Sap	0.0223824	0.0252446	0	0.0120221	0.00686766	0
1162	SEED	Respiration	Soluble_cytochromes_and_functionally_related_electron_carriers	Ferredoxin	Ferredoxin	0.322306	0.302935	0.224331	0.330608	0.350251	0.248201
1163	SEED	Respiration	ATP synthases	F0F1-type_ATP_synthase	ATP synthase alpha chain (EC 3.6.3.14)	0.129818	0.0757337	0.132298	0.102188	0.192294	0.0682552
1164	SEED	Respiration	Electron donating reactions	Hydrogenases	Periplasmic [Fe] hydrogenase (EC 1.12.7.2)	0.107435	0.0820448	0.0345125	0.216398	0.103015	0.0744602
1165	SEED	Respiration	ATP synthases	F0F1-type_ATP_synthase	ATP synthase beta chain (EC 3.6.3.14)	0.0895295	0.0820448	0.0862813	0.11421	0.109883	0.0930752
1166	SEED	Respiration	Electron donating reactions	Succinate_dehydrogenase	Succinate dehydrogenase flavoprotein subunit (EC 1.3.99.1)	0.0895295	0.0694225	0.069025	0.096177	0.103015	0.130305
1167	SEED	Respiration	Electron donating reactions	Respiratory_Complex_I	NADH-ubiquinone oxidoreductase chain L (EC 1.6.5.3)	0.0626707	0.119912	0.126546	0.0901659	0.0686766	0.0806652
1168	SEED	Respiration	Electron donating reactions	Na(+)-translocating_NADH-quinone_oxidoreductase_and_rnf-like_group_of_electron_transport_complexes	Electron transport complex protein RnfC	0.107435	0.0883559	0.0230083	0.132243	0.11675	0.0682552
1169	SEED	Respiration	Electron donating reactions	Succinate_dehydrogenase	Fumarate reductase flavoprotein subunit (EC 1.3.99.1)	0.107435	0.0504891	0.0632729	0.120221	0.0892796	0.0992802
1170	SEED	Respiration	Electron accepting reactions	Terminal_cytochrome_d_ubiquinol_oxidases	Cytochrome d ubiquinol oxidase subunit I (EC 1.10.3.-)	0.0492412	0.0504891	0.0230083	0.108199	0.0686766	0.18615
1171	SEED	Respiration	Biogenesis_of_c-type_cytochromes	Cytochrome c-type biogenesis protein DsbD, protein-disulfide reductase (EC 1.8.1.8)	Cytochrome c-type biogenesis protein DsbD, protein-disulfide reductase (EC 1.8.1.8)	0.0537177	0.0568003	0.0632729	0.0901659	0.0618089	0.0930752
1172	SEED	Respiration	ATP synthases	V-Type_ATP_synthase	V-type ATP synthase subunit A (EC 3.6.3.14)	0.0313353	0.0378668	0.10929	0.0540995	0.0480736	0.1241
1173	SEED	Respiration	Electron donating reactions	Respiratory_Complex_I	NADH-ubiquinone oxidoreductase chain M (EC 1.6.5.3)	0.0268589	0.119912	0.0747771	0.0480885	0.0824119	0.0496401
1174	SEED	Respiration	Electron donating reactions	Hydrogenases	Periplasmic [Fe] hydrogenase large subunit (EC 1.12.7.2)	0.094006	0.0315557	0.0460167	0.0540995	0.0824119	0.0806652
1175	SEED	Respiration	ATP synthases	F0F1-type_ATP_synthase	ATP synthase gamma chain (EC 3.6.3.14)	0.0447648	0.0757337	0.0977854	0.0120221	0.0755443	0.0806652
1176	SEED	Respiration	ATP synthases	V-Type_ATP_synthase	V-type ATP synthase subunit B (EC 3.6.3.14)	0.0447648	0.0189334	0.0747771	0.0540995	0.041206	0.1241
1177	SEED	Respiration	Electron donating reactions	Hydrogenases	NAD-reducing hydrogenase subunit HoxF (EC 1.12.1.2)	0.085053	0.0252446	0.0575209	0.0300553	0.0480736	0.0992802
1178	SEED	Respiration	Electron donating reactions	Respiratory_Complex_I	NADH-ubiquinone oxidoreductase chain H (EC 1.6.5.3)	0.0447648	0.044178	0.0287604	0.0420774	0.0755443	0.0806652
1179	SEED	Respiration	ATP synthases	F0F1-type_ATP_synthase	ATP synthase A chain (EC 3.6.3.14)	0.0179059	0.0252446	0.0460167	0.0601106	0.0892796	0.0558451
1180	SEED	Respiration	Electron donating reactions	Na(+)-translocating_NADH-quinone_oxidoreductase_and_rnf-like_group_of_electron_transport_complexes	Na(+)-translocating NADH-quinone reductase subunit A (EC 1.6.5.-)	0.0268589	0.0126223	0.0517688	0.0360664	0.0961472	0.0558451
1181	SEED	Respiration	ATP synthases	V-Type_ATP_synthase	V-type ATP synthase subunit I (EC 3.6.3.14)	0.0313353	0.0504891	0.0805292	0.0420774	0	0.0682552
1182	SEED	Respiration	Electron donating reactions	Na(+)-translocating_NADH-quinone_oxidoreductase_and_rnf-like_group_of_electron_transport_complexes	Electron transport complex protein RnfD	0.0626707	0.0378668	0.0345125	0.0420774	0.041206	0.0434351
1183	SEED	Respiration	Electron donating reactions	Na(+)-translocating_NADH-quinone_oxidoreductase_and_rnf-like_group_of_electron_transport_complexes	Na(+)-translocating NADH-quinone reductase subunit F (EC 1.6.5.-)	0.0447648	0.0126223	0.0230083	0.0300553	0.0824119	0.0620501
1184	SEED	Respiration	Formate_hydrogenase	Formate dehydrogenase-O, major subunit (EC 1.2.1.2)	Formate dehydrogenase-O, major subunit (EC 1.2.1.2)	0.0179059	0.0568003	0.0575209	0.0841548	0.020603	0.01241
1185	SEED	Respiration	Electron donating reactions	Respiratory_Complex_I	NADH-ubiquinone oxidoreductase chain N (EC 1.6.5.3)	0.00895295	0.044178	0.0460167	0.0180332	0.0480736	0.0806652
1186	SEED	Respiration	Electron donating reactions	Na(+)-translocating_NADH-quinone_oxidoreductase_and_rnf-like_group_of_electron_transport_complexes	Electron transport complex protein RnfE	0.0537177	0.0504891	0.0345125	0.0420774	0.020603	0.0248201
1187	SEED	Respiration	Electron donating reactions	Na(+)-translocating_NADH-quinone_oxidoreductase_and_rnf-like_group_of_electron_transport_complexes	Na(+)-translocating NADH-quinone reductase subunit B (EC 1.6.5.-)	0.0223824	0.0189334	0.0287604	0.0240442	0.0480736	0.0806652
1188	SEED	Respiration	Electron donating reactions	Na(+)-translocating_NADH-quinone_oxidoreductase_and_rnf-like_group_of_electron_transport_complexes	Electron transport complex protein RnfA	0.0223824	0.0504891	0.0345125	0.0480885	0.041206	0.018615
1189	SEED	Respiration	Electron donating reactions	Na(+)-translocating_NADH-quinone_oxidoreductase_and_rnf-like_group_of_electron_transport_complexes	Na(+)-translocating NADH-quinone reductase subunit E (EC 1.6.5.-)	0.0179059	0	0.0172563	0.0540995	0.0755443	0.0496401
1190	SEED	Respiration	Electron donating reactions	Succinate_dehydrogenase	Succinate dehydrogenase cytochrome b subunit	0.00895295	0.0315557	0.0632729	0.00601106	0.0343383	0.0682552
1191	SEED	Respiration	Electron donating reactions	Na(+)-translocating_NADH-quinone_oxidoreductase_and_rnf-like_group_of_electron_transport_complexes	Electron transport complex protein RnfG	0.0671471	0.044178	0.0172563	0.0120221	0.0618089	0.00620501
1192	SEED	Respiration	Electron donating reactions	Respiratory_Complex_I	NADH-ubiquinone oxidoreductase chain D (EC 1.6.5.3)	0.0223824	0.0315557	0.0345125	0.0420774	0.0343383	0.0372301
1193	SEED	Respiration	Electron donating reactions	Succinate_dehydrogenase	Succinate dehydrogenase iron-sulfur protein (EC 1.3.99.1)	0.0313353	0.0189334	0.0230083	0.0300553	0.0480736	0.0434351
1194	SEED	Respiration	ATP synthases	F0F1-type_ATP_synthase	ATP synthase delta chain (EC 3.6.3.14)	0.0358118	0.0504891	0.0172563	0.0240442	0.0274706	0.0310251
1195	SEED	Respiration	ATP synthases	V-Type_ATP_synthase	V-type ATP synthase subunit D (EC 3.6.3.14)	0.00895295	0.0378668	0.0402646	0	0.020603	0.0372301
1196	SEED	Respiration	Electron donating reactions	Respiratory_Complex_I	NADH-ubiquinone oxidoreductase chain B (EC 1.6.5.3)	0.0179059	0.00631114	0.0287604	0.00601106	0.0480736	0.0372301
1197	SEED	Respiration	Sodium Ion-Coupled Energetics	Na+_translocating_decarboxylases_and_related_biotin-dependent_enzymes	Membrane protein associated with methylmalonyl-CoA decarboxylase	0.0179059	0.0252446	0.0172563	0.0300553	0.0137353	0.0372301
1198	SEED	Respiration	Electron donating reactions	Respiratory_Complex_I	NADH-ubiquinone oxidoreductase chain J (EC 1.6.5.3)	0.0179059	0.00631114	0.0287604	0.0300553	0.020603	0.0372301
1199	SEED	Respiration	Electron donating reactions	Respiratory_Complex_I	NADH-ubiquinone oxidoreductase chain I (EC 1.6.5.3)	0.00447648	0	0.0230083	0.00601106	0.0274706	0.0744602
1200	SEED	Respiration	ATP synthases	F0F1-type_ATP_synthase	ATP synthase B chain (EC 3.6.3.14)	0.0134294	0.0315557	0.0287604	0.0240442	0.0137353	0.018615
1201	SEED	Respiration	Carbon_monoxide_induced_hydrogenase	CO dehydrogenase/acetyl-CoA synthase, acetyl-CoA synthase subunit (EC 2.3.1.169)	CO dehydrogenase/acetyl-CoA synthase, acetyl-CoA synthase subunit (EC 2.3.1.169)	0.0268589	0.00631114	0.0230083	0.0480885	0.00686766	0.018615
1202	SEED	Respiration	Electron donating reactions	Na(+)-translocating_NADH-quinone_oxidoreductase_and_rnf-like_group_of_electron_transport_complexes	Na(+)-translocating NADH-quinone reductase subunit C (EC 1.6.5.-)	0.00895295	0.0126223	0.0402646	0.0240442	0	0.0372301
1203	SEED	Respiration	Electron donating reactions	Na(+)-translocating_NADH-quinone_oxidoreductase_and_rnf-like_group_of_electron_transport_complexes	Na(+)-translocating NADH-quinone reductase subunit D (EC 1.6.5.-)	0	0.0126223	0.0172563	0.0120221	0.0480736	0.018615
1204	SEED	Respiration	Electron donating reactions	Respiratory_dehydrogenases_1	Anaerobic glycerol-3-phosphate dehydrogenase subunit A (EC 1.1.99.5)	0.0358118	0	0.0460167	0.00601106	0.00686766	0.01241
1205	SEED	Respiration	Electron accepting reactions	Anaerobic_respiratory_reductases	Heterodisulfide reductase, subunit A	0.0268589	0.0126223	0.00575209	0.0480885	0.00686766	0.00620501
1206	SEED	Respiration	ATP synthases	V-Type_ATP_synthase	V-type ATP synthase subunit C (EC 3.6.3.14)	0.0134294	0.0189334	0.0287604	0	0.0137353	0.0310251
1207	SEED	Respiration	Biogenesis_of_c-type_cytochromes	Putative cytochrome C-type biogenesis protein	Putative cytochrome C-type biogenesis protein	0.00447648	0.0189334	0.0115042	0.0240442	0.020603	0.0248201
1208	SEED	Respiration	Electron donating reactions	Respiratory_Complex_I	NADH ubiquinone oxidoreductase chain A (EC 1.6.5.3)	0.0268589	0.0126223	0.0115042	0	0.0274706	0.0248201
1209	SEED	Respiration	ATP synthases	V-Type_ATP_synthase	V-type ATP synthase subunit K (EC 3.6.3.14)	0	0.0126223	0.0287604	0.0180332	0.0137353	0.0248201
1210	SEED	Respiration	Electron accepting reactions	Anaerobic_respiratory_reductases	Dissimilatory sulfite reductase (desulfoviridin), alpha and beta subunits	0.0179059	0.0315557	0.0230083	0.0180332	0.00686766	0
1211	SEED	Respiration	Biogenesis_of_c-type_cytochromes	Cytochrome c-type biogenesis protein ResA	Cytochrome c-type biogenesis protein ResA	0.0223824	0.0126223	0	0.0360664	0.00686766	0.018615
1212	SEED	Respiration	ATP synthases	F0F1-type_ATP_synthase	ATP synthase C chain (EC 3.6.3.14)	0.0134294	0	0.0115042	0.00601106	0	0.0620501
1213	SEED	Respiration	Carbon_monoxide_induced_hydrogenase	Similar to carbon monoxide dehydrogenase CooS subunit	Similar to carbon monoxide dehydrogenase CooS subunit	0.0358118	0	0.0230083	0	0.020603	0.01241
1214	SEED	Respiration	Electron accepting reactions	Terminal_cytochrome_d_ubiquinol_oxidases	Transport ATP-binding protein CydC	0.00447648	0.0252446	0.0115042	0.0420774	0.00686766	0
1215	SEED	Respiration	ATP synthases	V-Type_ATP_synthase	V-type ATP synthase subunit F (EC 3.6.3.14)	0	0	0.0345125	0.0300553	0	0.0248201
1216	SEED	Respiration	ATP synthases	F0F1-type_ATP_synthase	ATP synthase epsilon chain (EC 3.6.3.14)	0.0134294	0.044178	0.00575209	0.00601106	0.0137353	0.00620501
1217	SEED	Respiration	Electron donating reactions	Respiratory_Complex_I	NADH dehydrogenase subunit 5	0.0268589	0.0126223	0.00575209	0.0300553	0	0.01241
1218	SEED	Respiration	Carbon_monoxide_induced_hydrogenase	CO dehydrogenase accessory protein CooC (nickel insertion)	CO dehydrogenase accessory protein CooC (nickel insertion)	0.0134294	0.0189334	0.0172563	0.0360664	0	0
1219	SEED	Respiration	Sodium Ion-Coupled Energetics	Na+_translocating_decarboxylases_and_related_biotin-dependent_enzymes	Biotin carboxyl carrier protein of methylmalonyl-CoA decarboxylase	0.00895295	0.0252446	0.0115042	0.00601106	0.0137353	0.018615
1220	SEED	Respiration	Formate_hydrogenase	Formate hydrogenlyase subunit 3	Formate hydrogenlyase subunit	0.0179059	0.0126223	0.0115042	0.0180332	0.00686766	0.01241
1221	SEED	Respiration	Electron donating reactions	Hydrogenases	NAD-reducing hydrogenase subunit HoxE (EC 1.12.1.2)	0.0223824	0.0315557	0	0.00601106	0.00686766	0.01241
1222	SEED	Respiration	Flavocytochrome_C	Flavocytochrome c flavin subunit	Flavocytochrome c flavin subunit	0.0223824	0	0	0.0360664	0.0137353	0.00620501
1223	SEED	Respiration	Sodium Ion-Coupled Energetics	Na+_translocating_decarboxylases_and_related_biotin-dependent_enzymes	Glutaconyl-CoA decarboxylase beta chain (EC 4.1.1.70)	0.0179059	0.00631114	0.0172563	0.0240442	0.00686766	0
1224	SEED	Respiration	Electron accepting reactions	trimethylamine_N-oxide_(TMAO)_reductase	Functional role page for TorCAD operon transcriptional regulatory protein TorR	0.00447648	0.0315557	0	0.0360664	0	0
1225	SEED	Respiration	Electron donating reactions	Respiratory_Complex_I	NADH-ubiquinone oxidoreductase chain K (EC 1.6.5.3)	0.00447648	0.0252446	0.0115042	0.0180332	0	0.01241
1226	SEED	Respiration	Electron accepting reactions	Terminal_cytochrome_d_ubiquinol_oxidases	Transport ATP-binding protein CydD	0.00895295	0.0126223	0.0115042	0.0180332	0.0137353	0.00620501
1227	SEED	Respiration	Electron donating reactions	NiFe_hydrogenase_maturation	[NiFe] hydrogenase metallocenter assembly protein HypF	0.0134294	0.0126223	0.00575209	0	0.0137353	0.018615
1228	SEED	Respiration	Biogenesis_of_c-type_cytochromes	Thiol:disulfide oxidoreductase related to ResA	Thiol:disulfide oxidoreductase related to ResA	0.00895295	0.00631114	0.00575209	0.0360664	0.00686766	0
1229	SEED	Respiration	Electron donating reactions	Na(+)-translocating_NADH-quinone_oxidoreductase_and_rnf-like_group_of_electron_transport_complexes	Electron transport complex protein RnfB	0.0134294	0.00631114	0.0115042	0.0120221	0.020603	0
1230	SEED	Respiration	Soluble_cytochromes_and_functionally_related_electron_carriers	Cytochrome c552 precursor (EC 1.7.2.2)	Cytochrome c552 precursor (EC 1.7.2.2)	0.0134294	0.0252446	0	0.0180332	0	0.00620501
1231	SEED	RNA Metabolism	Group_II_intron-associated_genes	Retron-type reverse transcriptase	Retron-type reverse transcriptase	0.819195	0.769959	0.765027	0.709305	0.714237	0.601886
1232	SEED	RNA Metabolism	Transcription	RNA_polymerase_bacterial	DNA-directed RNA polymerase beta subunit (EC 2.7.7.6)	0.420789	0.403913	0.454415	0.258476	0.43953	0.322661
1233	SEED	RNA Metabolism	Transcription	RNA_polymerase_bacterial	DNA-directed RNA polymerase beta' subunit (EC 2.7.7.6)	0.353642	0.403913	0.327869	0.384708	0.432663	0.372301
1234	SEED	RNA Metabolism	Transcription	Transcription_factors_bacterial	Transcription-repair coupling factor	0.3044	0.208268	0.345125	0.246453	0.384589	0.341276
1235	SEED	RNA Metabolism	RNA processing and modification	Queuosine-Archaeosine_Biosynthesis	Permease of the drug/metabolite transporter (DMT) superfamily	0.232777	0.132534	0.195571	0.16831	0.260971	0.19856
1236	SEED	RNA Metabolism	RNA processing and modification	Polyadenylation_bacterial	Polyribonucleotide nucleotidyltransferase (EC 2.7.7.8)	0.188012	0.195645	0.212827	0.138254	0.20603	0.16133
1237	SEED	RNA Metabolism	Transcription	Transcription_initiation,_bacterial_sigma_factors	RNA polymerase sigma-70 factor	0.210394	0.183023	0.132298	0.11421	0.199162	0.19856
1238	SEED	RNA Metabolism	RNA processing and modification	RNA_processing_and_degradation,_bacterial	3'-to-5' exoribonuclease RNase R	0.120865	0.107289	0.235835	0.186343	0.171692	0.155125
1239	SEED	RNA Metabolism	RNA processing and modification	Queuosine-Archaeosine_Biosynthesis	S-adenosylmethionine:tRNA ribosyltransferase-isomerase (EC 5.-.-.-)	0.192488	0.100978	0.184067	0.126232	0.178559	0.192355
1240	SEED	RNA Metabolism	Transcription	Transcription_factors_cyanobacterial_RpoD-like_sigma_factors	RNA polymerase sigma factor RpoD	0.111912	0.113601	0.143802	0.138254	0.164824	0.11169
1241	SEED	RNA Metabolism	Transcription	Transcription_initiation,_bacterial_sigma_factors	RNA polymerase sigma-54 factor RpoN	0.102959	0.208268	0.0920334	0.102188	0.11675	0.130305
1242	SEED	RNA Metabolism	Transcription	RNA_polymerase_bacterial	DNA-directed RNA polymerase alpha subunit (EC 2.7.7.6)	0.0761001	0.151467	0.132298	0.0721327	0.123618	0.18615
1243	SEED	RNA Metabolism	Transcription	Transcription_factors_bacterial	Transcription termination protein NusA	0.111912	0.0694225	0.155306	0.138254	0.137353	0.11169
1244	SEED	RNA Metabolism	RNA processing and modification	Wyeosine-MimG_Biosynthesis	Thioredoxin reductase (EC 1.8.1.9)	0.125341	0.100978	0.115042	0.108199	0.137353	0.13651
1245	SEED	RNA Metabolism	RNA processing and modification	ATP-dependent_RNA_helicases,_bacterial	Cold-shock DEAD-box protein A	0.085053	0.132534	0.103538	0.0841548	0.109883	0.142715
1246	SEED	RNA Metabolism	RNA processing and modification	Queuosine-Archaeosine_Biosynthesis	tRNA-guanine transglycosylase (EC 2.4.2.29)	0.0805766	0.0946671	0.069025	0.0540995	0.219765	0.0806652
1247	SEED	RNA Metabolism	RNA processing and modification	tRNA_processing	tRNA delta(2)-isopentenylpyrophosphate transferase (EC 2.5.1.8)	0.0626707	0.0883559	0.103538	0.132243	0.0686766	0.13651
1248	SEED	RNA Metabolism	RNA processing and modification	tRNA_processing	tRNA pseudouridine synthase A (EC 4.2.1.70)	0.0716236	0.126223	0.172563	0.0420774	0.0824119	0.0620501
1249	SEED	RNA Metabolism	RNA processing and modification	RNA_processing_and_degradation,_bacterial	Cytoplasmic axial filament protein CafA and Ribonuclease G (EC 3.1.4.-)	0.0626707	0.0757337	0.0977854	0.0420774	0.0824119	0.117895
1250	SEED	RNA Metabolism	RNA processing and modification	Queuosine-Archaeosine_Biosynthesis	Peptidyl-prolyl cis-trans isomerase (EC 5.2.1.8)	0.0492412	0.0378668	0.069025	0.0781438	0.103015	0.13651
1251	SEED	RNA Metabolism	RNA processing and modification	tRNA_processing	tRNA(Ile)-lysidine synthetase	0.0895295	0.0378668	0.143802	0.0601106	0.0549413	0.0620501
1252	SEED	RNA Metabolism	RNA processing and modification	tRNA_processing	tRNA pseudouridine synthase B (EC 4.2.1.70)	0.0671471	0.044178	0.0805292	0.0420774	0.0686766	0.142715
1253	SEED	RNA Metabolism	Transcription	Transcription_factors_bacterial	Transcription termination factor Rho	0.0671471	0.0631114	0.0977854	0.0601106	0.0892796	0.0620501
1254	SEED	RNA Metabolism	RNA processing and modification	Wyeosine-MimG_Biosynthesis	tRNA (Guanine37-N1) -methyltransferase (EC 2.1.1.31)	0.0447648	0.107289	0.0920334	0.0540995	0.0480736	0.0744602
1255	SEED	RNA Metabolism	Transcription	Transcription_factors_bacterial	Transcription elongation factor GreA	0.0716236	0.0694225	0.0632729	0.108199	0.0686766	0.018615
1256	SEED	RNA Metabolism	Transcription	Transcription_initiation,_bacterial_sigma_factors	RNA polymerase sigma factor SigW	0.0581942	0.100978	0.0862813	0.0601106	0.041206	0.0496401
1257	SEED	RNA Metabolism	RNA processing and modification	RNA_3'-terminal_phosphate_cyclase	Protein RtcB	0.0895295	0.0757337	0.069025	0.0120221	0.0755443	0.0496401
1258	SEED	RNA Metabolism	RNA processing and modification	tRNA_processing	Ribonuclease BN (EC 3.1.-.-)	0.0313353	0.0378668	0.0747771	0.0661217	0.0549413	0.105485
1259	SEED	RNA Metabolism	Transcription	Transcription_initiation,_bacterial_sigma_factors	RNA polymerase sigma factor RpoE	0.111912	0.0694225	0.0287604	0.096177	0.020603	0.0372301
1260	SEED	RNA Metabolism	Transcription	Transcription_factors_bacterial	Transcription antitermination protein NusG	0.0447648	0.0757337	0.0805292	0.0661217	0.0480736	0.0434351
1261	SEED	RNA Metabolism	Transcription	Transcription_initiation,_bacterial_sigma_factors	RNA polymerase sporulation specific sigma factor SigG	0.0358118	0.0568003	0.0517688	0.0420774	0.0549413	0.0930752
1262	SEED	RNA Metabolism	Transcription	Transcription_factors_bacterial	COG0779: clustered with transcription termination protein NusA	0.0716236	0.0378668	0.0517688	0.0300553	0.0343383	0.0992802
1263	SEED	RNA Metabolism	Transcription	Transcription_factors_bacterial	Transcription antitermination protein UpdY	0.0179059	0.0252446	0.0287604	0.0360664	0.130486	0.0682552
1264	SEED	RNA Metabolism	Transcription	Transcription_factors_bacterial	Transcription termination protein NusB	0.0358118	0.0315557	0.0805292	0.0360664	0.041206	0.0806652
1265	SEED	RNA Metabolism	RNA processing and modification	tRNA_processing	tRNA-specific adenosine-34 deaminase (EC 3.5.4.-)	0.0581942	0.0189334	0.0862813	0.0360664	0.0480736	0.0434351
1266	SEED	RNA Metabolism	RNA processing and modification	tRNA_processing	Ribonuclease Z (EC 3.1.26.11)	0.0402883	0.0252446	0.0517688	0.0661217	0.0549413	0.0496401
1267	SEED	RNA Metabolism	RNA processing and modification	RNA_processing_and_degradation,_bacterial	Ribonuclease III (EC 3.1.26.3)	0.0313353	0.0504891	0.0345125	0.0601106	0.041206	0.0620501
1268	SEED	RNA Metabolism	RNA processing and modification	ATP-dependent_RNA_helicases,_bacterial	ATP-dependent RNA helicase DbpA	0.0268589	0.0315557	0.0575209	0.0120221	0.0686766	0.0744602
1269	SEED	RNA Metabolism	Transcription	Transcription_initiation,_bacterial_sigma_factors	RNA polymerase sporulation specific sigma factor SigK	0.0626707	0.0378668	0.0230083	0.0240442	0.0343383	0.0372301
1270	SEED	RNA Metabolism	RNA processing and modification	Queuosine-Archaeosine_Biosynthesis	Queuosine Biosynthesis QueC ATPase	0.0402883	0.044178	0.0230083	0.0240442	0.041206	0.0372301
1271	SEED	RNA Metabolism	RNA processing and modification	Ribonuclease_H	Ribonuclease HI (EC 3.1.26.4)	0.0358118	0.0504891	0.0230083	0.00601106	0.0480736	0.0434351
1272	SEED	RNA Metabolism	Transcription	Transcription_initiation,_bacterial_sigma_factors	RNA polymerase sporulation specific sigma factor SigE	0.0313353	0.0568003	0.0402646	0.0180332	0.0343383	0.00620501
1273	SEED	RNA Metabolism	RNA processing and modification	RNA_processing_and_degradation,_bacterial	FIG146085: 3'-to-5' oligoribonuclease A, Bacillus type	0.0581942	0.0126223	0.0402646	0.0240442	0.0343383	0.01241
1274	SEED	RNA Metabolism	RNA processing and modification	Queuosine-Archaeosine_Biosynthesis	NADPH dependent preQ0 reductase	0.0358118	0.0189334	0.0230083	0.0360664	0.0549413	0.01241
1275	SEED	RNA Metabolism	RNA processing and modification	ATP-dependent_RNA_helicases,_bacterial	ATP-dependent RNA helicase RhlE	0.0223824	0.0631114	0.00575209	0.0120221	0.020603	0.0558451
1276	SEED	RNA Metabolism	Transcription	Transcription_initiation,_bacterial_sigma_factors	RNA polymerase sporulation specific sigma factor SigF	0.0671471	0.0126223	0.0115042	0.0240442	0.0343383	0.01241
1277	SEED	RNA Metabolism	RNA processing and modification	Queuosine-Archaeosine_Biosynthesis	Queuosine Biosynthesis QueE Radical SAM	0.0313353	0.0126223	0.0402646	0.00601106	0.0274706	0.018615
1278	SEED	RNA Metabolism	Transcription	Rrf2_family_transcriptional_regulators	Iron-sulfur cluster regulator IscR	0.0313353	0.00631114	0.0345125	0.0120221	0.0343383	0.01241
1279	SEED	RNA Metabolism	RNA processing and modification	tRNA_processing	Ribonuclease P protein component (EC 3.1.26.5)	0.00895295	0.0315557	0.0115042	0.0120221	0.020603	0.0310251
1280	SEED	RNA Metabolism	Transcription	Rrf2_family_transcriptional_regulators	Rrf2 family transcriptional regulator, group III	0.00895295	0.0568003	0	0.0240442	0.0137353	0
1281	SEED	RNA Metabolism	RNA processing and modification	Queuosine-Archaeosine_Biosynthesis	glutamyl-Q-tRNA synthetase	0.00895295	0.0378668	0.0115042	0.0180332	0.020603	0.00620501
1282	SEED	RNA Metabolism	Transcription	Transcription_initiation,_bacterial_sigma_factors	Serine protease precursor MucD/AlgY associated with sigma factor RpoE	0.0268589	0.0126223	0.0230083	0.0120221	0.020603	0.00620501
1283	SEED	RNA Metabolism	RNA processing and modification	Ribonuclease_H	Ribonuclease HI-related protein 3	0.0134294	0.0189334	0.0230083	0.0120221	0.0137353	0.01241
1284	SEED	RNA Metabolism	Transcription	Transcription_initiation,_bacterial_sigma_factors	RNA polymerase sigma factor for flagellar operon	0.0134294	0.0378668	0.00575209	0.0180332	0.0137353	0
1285	SEED	RNA Metabolism	RNA processing and modification	Wyeosine-MimG_Biosynthesis	Iron-sulfur cluster assembly scaffold protein IscU	0.00447648	0.00631114	0.0287604	0.0120221	0.00686766	0.0248201
1286	SEED	RNA Metabolism	Transcription	Transcription_factors_bacterial	ribosomal protein L7Ae family protein	0.00895295	0.0252446	0.0172563	0.0180332	0.00686766	0.00620501
1287	SEED	RNA Metabolism	Transcription	Transcription_initiation,_bacterial_sigma_factors	RNA polymerase sporulation specific sigma factor SigH	0.00895295	0.00631114	0.00575209	0.00601106	0.041206	0.01241
1288	SEED	RNA Metabolism	RNA processing and modification	Queuosine-Archaeosine_Biosynthesis	Queuosine biosynthesis QueD, PTPS-I	0.0134294	0.0252446	0.00575209	0.0120221	0.0137353	0.00620501
1289	SEED	RNA Metabolism	RNA processing and modification	Queuosine-Archaeosine_Biosynthesis	Substrate-specific component QueT (COG4708) of predicted queuosine-regulated ECF transporter	0.00895295	0.0189334	0.00575209	0.0180332	0	0.018615
1290	SEED	RNA Metabolism	RNA processing and modification	Ribonuclease_H	Ribonuclease HI-related protein	0.0179059	0.00631114	0.0115042	0.0180332	0.00686766	0.00620501
1291	SEED	RNA Metabolism	Transcription	Transcription_factors_bacterial	COG2740: Predicted nucleic-acid-binding protein implicated in transcription termination	0.00895295	0.00631114	0.0230083	0.0180332	0.00686766	0
1292	SEED	RNA Metabolism	RNA processing and modification	Queuosine-Archaeosine_Biosynthesis	Putative preQ0 transporter	0.0134294	0.00631114	0.0115042	0.0120221	0.00686766	0.01241
1293	SEED	Secondary Metabolism	Bacterial cytostatics, differentiation factors and antibiotics	2-isocapryloyl-3R-hydroxymethyl-gamma-butyrolactone_and_other_bacterial_morphogens	5-Methyltetrahydrofolate--homocysteine methyltransferase	0.0537177	0.107289	0.0920334	0.0781438	0.0686766	0.0992802
1294	SEED	Secondary Metabolism	Plant Hormones	Auxin_biosynthesis	Tryptophan synthase beta chain (EC 4.2.1.20)	0.0716236	0.0820448	0.132298	0.0661217	0.0343383	0.0930752
1295	SEED	Secondary Metabolism	Plant Hormones	Auxin_biosynthesis	Anthranilate phosphoribosyltransferase (EC 2.4.2.18)	0.0223824	0.0568003	0.103538	0.0240442	0.0343383	0.0620501
1296	SEED	Secondary Metabolism	Plant Hormones	Auxin_biosynthesis	Tryptophan synthase alpha chain (EC 4.2.1.20)	0.0134294	0.0189334	0.069025	0.0120221	0.0480736	0.0496401
1297	SEED	Secondary Metabolism	Aromatic amino acids and derivatives.1	Cinnamic_Acid_Degradation	4-hydroxy-2-oxovalerate aldolase (EC 4.1.3.-)	0.0313353	0.0631114	0.0172563	0.00601106	0.0137353	0.018615
1298	SEED	Secondary Metabolism	Plant Hormones	Auxin_biosynthesis	Phosphoribosylanthranilate isomerase (EC 5.3.1.24)	0.00895295	0.0126223	0.0345125	0.0180332	0	0.0248201
1299	SEED	Stress Response	Heat_shock_dnaK_gene_cluster_extended	Chaperone protein DnaJ	Chaperone protein DnaJ	0.237253	0.132534	0.2761	0.240442	0.185427	0.304046
1300	SEED	Stress Response	Heat_shock_dnaK_gene_cluster_extended	Chaperone protein DnaK	Chaperone protein DnaK	0.205918	0.265068	0.143802	0.198365	0.281574	0.18615
1301	SEED	Stress Response	Oxidative stress	Rubrerythrin	Rubrerythrin	0.138771	0.0820448	0.218579	0.144265	0.281574	0.304046
1302	SEED	Stress Response	Heat_shock_dnaK_gene_cluster_extended	Translation elongation factor LepA	Translation elongation factor LepA	0.143247	0.119912	0.218579	0.186343	0.151089	0.18615
1303	SEED	Stress Response	Heat_shock_dnaK_gene_cluster_extended	MiaB family protein, possibly involved in tRNA or rRNA modification	MiaB family protein, possibly involved in tRNA or rRNA modification	0.116388	0.132534	0.115042	0.0841548	0.103015	0.167535
1304	SEED	Stress Response	Hfl_operon	GTP-binding protein HflX	GTP-binding protein HflX	0.134294	0.0946671	0.103538	0.0661217	0.130486	0.130305
1305	SEED	Stress Response	SigmaB_stress_responce_regulation	Serine phosphatase RsbU, regulator of sigma subunit	Serine phosphatase RsbU, regulator of sigma subunit	0.183536	0.126223	0.120794	0.0781438	0.0618089	0.0868702
1306	SEED	Stress Response	Oxidative stress	Redox-dependent_regulation_of_nucleus_processes	NAD-dependent deacetylase	0.0581942	0.107289	0.0747771	0.0721327	0.103015	0.105485
1307	SEED	Stress Response	Heat_shock_dnaK_gene_cluster_extended	Tetrapyrrole (Corrin-Porphyrin) methylase family protein UPF0011	Tetrapyrrole (Corrin-Porphyrin) methylase family protein UPF00 18	0.0805766	0.0946671	0.0575209	0.0661217	0.0686766	0.11169
1308	SEED	Stress Response	Heat_shock_dnaK_gene_cluster_extended	Signal peptidase-like protein	Signal peptidase-like protein	0.0447648	0.0946671	0.0747771	0.0841548	0.0686766	0.0868702
1309	SEED	Stress Response	Heat_shock_dnaK_gene_cluster_extended	Nucleoside 5-triphosphatase RdgB (dHAPTP, dITP, XTP-specific) (EC 3.6.1.15)	Nucleoside 5-triphosphatase RdgB (dHAPTP, dITP, XTP-specific) (EC 3.6.1.15)	0.0626707	0.0694225	0.069025	0.0420774	0.0824119	0.105485
1310	SEED	Stress Response	Acid stress	Acid_resistance_mechanisms	Probable glutamate/gamma-aminobutyrate antiporter	0.0358118	0.0378668	0.0632729	0.138254	0.0892796	0.0434351
1311	SEED	Stress Response	Heat_shock_dnaK_gene_cluster_extended	Ribosomal protein L11 methyltransferase (EC 2.1.1.-)	Ribosomal protein L11 methyltransferase (EC 2.1.1.-)	0.0581942	0.100978	0.0920334	0.0420774	0.0480736	0.0558451
1312	SEED	Stress Response	Oxidative stress	Oxidative_stress	Redox-sensitive transcriptional regulator (AT-rich DNA-binding protein)	0.0761001	0.00631114	0.0575209	0.0540995	0.109883	0.0496401
1313	SEED	Stress Response	Heat_shock_dnaK_gene_cluster_extended	Heat-inducible transcription repressor HrcA	Heat-inducible transcription repressor HrcA	0.0984825	0.0757337	0.0230083	0.0480885	0.0892796	0.018615
1314	SEED	Stress Response	Oxidative stress	Oxidative_stress	Transcriptional regulator, Crp/Fnr family	0.0492412	0.0504891	0.0402646	0.0661217	0.0755443	0.0496401
1315	SEED	Stress Response	Heat_shock_dnaK_gene_cluster_extended	Heat shock protein GrpE	Heat shock protein GrpE	0.0716236	0.0568003	0.0345125	0.0300553	0.0686766	0.0248201
1316	SEED	Stress Response	Bacterial_hemoglobins	diguanylate cyclase/phosphodiesterase (GGDEF & EAL domains) with PAS/PAC sensor(s)	diguanylate cyclase/phosphodiesterase (GGDEF & EAL domains) with PAS/PAC sensor(s)	0.085053	0.119912	0.0172563	0.0180332	0.0274706	0.018615
1317	SEED	Stress Response	Heat_shock_dnaK_gene_cluster_extended	Ribosomal RNA small subunit methyltransferase E (EC 2.1.1.-)	Ribosomal RNA small subunit methyltransferase E (EC 2.1.1.-)	0.0268589	0.0315557	0.0805292	0.0240442	0.041206	0.0806652
1318	SEED	Stress Response	Osmotic stress	Choline_and_Betaine_Uptake_and_Betaine_Biosynthesis	Sarcosine oxidase alpha subunit (EC 1.5.3.1)	0.0313353	0.0252446	0.00575209	0.0360664	0.0480736	0.117895
1319	SEED	Stress Response	Osmotic stress	Choline_and_Betaine_Uptake_and_Betaine_Biosynthesis	Choline binding protein A	0.0447648	0.0315557	0.0460167	0.0420774	0.0824119	0.01241
1320	SEED	Stress Response	Osmotic stress	Choline_and_Betaine_Uptake_and_Betaine_Biosynthesis	Choline-sulfatase (EC 3.1.6.6)	0.0671471	0.0252446	0.0172563	0.0661217	0.0137353	0.0434351
1321	SEED	Stress Response	Detoxification	D-tyrosyl-tRNA(Tyr)_deacylase	D-tyrosyl-tRNA(Tyr) deacylase	0.0447648	0.0504891	0.0402646	0.0180332	0.0343383	0.0310251
1322	SEED	Stress Response	Heat_shock_dnaK_gene_cluster_extended	Ribosome-associated heat shock protein implicated in the recycling of the 50S subunit (S4 paralog)	Ribosome-associated heat shock protein implicated in the recycling of the 50S subunit (S4 paralog)	0.0402883	0.0252446	0.0632729	0.0420774	0	0.0434351
1323	SEED	Stress Response	Oxidative stress	Oxidative_stress	Superoxide dismutase [Fe] (EC 1.15.1.1)	0.0223824	0	0.0287604	0.0120221	0.041206	0.0930752
1324	SEED	Stress Response	Oxidative stress	Glutathione:_Non-redox_reactions	Similar to Hydroxyacylglutathione hydrolase, but in an organism lacking glutathione biosynthesis	0.0223824	0.00631114	0.0230083	0.0120221	0.0274706	0.0620501
1325	SEED	Stress Response	SigmaB_stress_responce_regulation	anti sigma b factor antagonist RsbV	anti sigma b factor antagonist RsbV	0.0492412	0.0315557	0.0230083	0.0180332	0.0137353	0.01241
1326	SEED	Stress Response	Hfl_operon	HflK protein	HflK protein	0.0134294	0.0315557	0.00575209	0.0180332	0.0343383	0.00620501
1327	SEED	Stress Response	Heat_shock_dnaK_gene_cluster_extended	FIG009886: phosphoesterase	FIG009886: phosphoesterase	0.0268589	0.00631114	0.00575209	0.0300553	0.00686766	0.0310251
1328	SEED	Stress Response	Oxidative stress	Glutathione:_Biosynthesis_and_gamma-glutamyl_cycle	Gamma-glutamyltranspeptidase (EC 2.3.2.2)	0.0268589	0.0252446	0.00575209	0.00601106	0.0274706	0.00620501
1329	SEED	Stress Response	Osmotic stress	Ectoine_biosynthesis_and_regulation	Diaminobutyrate-pyruvate aminotransferase (EC 2.6.1.46)	0.00447648	0	0.0460167	0.00601106	0	0.018615
1330	SEED	Stress Response	Acid stress	Acid_resistance_mechanisms	Glutamate decarboxylase (EC 4.1.1.15)	0.00447648	0	0.0115042	0.0240442	0.0137353	0.018615
1331	SEED	Stress Response	Oxidative stress	Oxidative_stress	Peroxide stress regulator PerR, FUR family	0.0134294	0.0189334	0	0.0120221	0.0137353	0.01241
1332	SEED	Stress Response	Oxidative stress	Oxidative_stress	Transcriptional regulator, FUR family	0.0134294	0.0189334	0.0172563	0	0	0.018615
1333	SEED	Stress Response	Hfl_operon	HflC protein	HflC protein	0.0223824	0.00631114	0.0115042	0	0.00686766	0.018615
1334	SEED	Sulfur Metabolism	Galactosylceramide_and_Sulfatide_metabolism	Alpha-galactosidase (EC 3.2.1.22)	Alpha-galactosidase (EC 3.2.1.22), 5 4 3 4 4 33	0.237253	0.284001	0.189819	0.258476	0.288442	0.204765
1335	SEED	Sulfur Metabolism	Organic sulfur assimilation	Alkanesulfonate_assimilation	Arylsulfatase (EC 3.1.6.1)	0.0313353	0.0631114	0.0230083	0.0841548	0.0824119	0.16133
1336	SEED	Sulfur Metabolism	Thioredoxin-disulfide_reductase	Hydrogen peroxide-inducible genes activator	Hydrogen peroxide-inducible genes activator	0.0313353	0.0378668	0.069025	0.0180332	0.0343383	0.0248201
1337	SEED	Sulfur Metabolism	Thioredoxin-disulfide_reductase	Thiol peroxidase, Bcp-type (EC 1.11.1.15)	Thiol peroxidase, Bcp-type (EC 1.11.1.15)	0.0268589	0.0631114	0.0402646	0.0120221	0.0343383	0.0248201
1338	SEED	Sulfur Metabolism	Organic sulfur assimilation	Alkanesulfonate_assimilation	ABC-type nitrate/sulfonate/bicarbonate transport systems, periplasmic components	0.0313353	0.0504891	0.00575209	0.0300553	0.0274706	0.01241
1339	SEED	Sulfur Metabolism	Galactosylceramide_and_Sulfatide_metabolism	Alpha-galactosidase precursor (EC 3.2.1.22)	Alpha-galactosidase precursor (EC 3.2.1.22)	0.0313353	0.0126223	0.00575209	0.0240442	0.0618089	0.00620501
1340	SEED	Sulfur Metabolism	Organic sulfur assimilation	Alkanesulfonate_assimilation	Putative arylsulfatase regulatory protein	0.00895295	0.0189334	0.0287604	0.0120221	0.0274706	0.0372301
1341	SEED	Sulfur Metabolism	Organic sulfur assimilation	Alkanesulfonate_assimilation	ABC-type nitrate/sulfonate/bicarbonate transport system, ATPase component	0.0447648	0	0.0115042	0.0300553	0.0343383	0
1342	SEED	Sulfur Metabolism	Organic sulfur assimilation	Utilization_of_glutathione_as_a_sulphur_source	Putative glutathione transporter, permease component	0.0223824	0.0315557	0.0172563	0.0120221	0.020603	0
1343	SEED	Sulfur Metabolism	Organic sulfur assimilation	Alkanesulfonate_assimilation	ABC-type nitrate/sulfonate/bicarbonate transport system, permease component	0.0358118	0.0126223	0.0172563	0.0180332	0.0137353	0.00620501
1344	SEED	Sulfur Metabolism	Thioredoxin-disulfide_reductase	Thiol peroxidase, Tpx-type (EC 1.11.1.15)	Thiol peroxidase, Tpx-type (EC 1.11.1.15)	0	0.044178	0.0115042	0.00601106	0.0343383	0.00620501
1345	SEED	Sulfur Metabolism	Galactosylceramide_and_Sulfatide_metabolism	Beta-galactosidase large subunit (EC 3.2.1.23)	Beta-galactosidase large subunit (EC 3.2.1.23)	0.0268589	0.0252446	0.0115042	0.0300553	0	0
1346	SEED	Sulfur Metabolism	Galactosylceramide_and_Sulfatide_metabolism	Neuraminidase NanP	Neuraminidase NanP	0.0313353	0.0126223	0.00575209	0.0120221	0.0137353	0.01241
1347	SEED	Sulfur Metabolism	Galactosylceramide_and_Sulfatide_metabolism	Sialidase (EC 3.2.1.18)	Sialidase (EC 3.2.1.18)	0.00447648	0.0189334	0.00575209	0.0180332	0.0137353	0.018615
1348	SEED	Sulfur Metabolism	Thioredoxin-disulfide_reductase	Alkyl hydroperoxide reductase protein C (EC 1.6.4.-)	Alkyl hydroperoxide reductase protein C (EC 1.6.4.-)	0.0179059	0.00631114	0	0.0120221	0.041206	0
1349	SEED	Sulfur Metabolism	Organic sulfur assimilation	Alkanesulfonate_assimilation	Alkanesulfonates ABC transporter ATP-binding protein	0.0134294	0.00631114	0	0.0240442	0.0137353	0.00620501
1350	SEED	Virulence	Ton_and_Tol_transport_systems	TonB-dependent receptor	TonB-dependent receptor	1.85774	1.56516	1.8004	2.46453	2.36934	3.13974
1351	SEED	Virulence	Regulation of virulence	Streptococcal_Mga_Regulon	Two-component system response regulator	0.608801	0.687914	0.557952	0.571051	0.714237	0.639116
1352	SEED	Virulence	Resistance to antibiotics and toxic compounds	Multidrug_Resistance_Efflux_Pumps	Multi antimicrobial extrusion protein (Na(+)/drug antiporter), MATE family of MDR efflux pumps	0.617754	0.599558	0.477423	0.540995	0.52881	0.297841
1353	SEED	Virulence	Iron Scavenging Mechanisms	Iron_acquisition_in_Vibrio	Ferrous iron transport protein B	0.362595	0.302935	0.419902	0.306564	0.336515	0.440556
1354	SEED	Virulence	Resistance to antibiotics and toxic compounds	Resistance_to_fluoroquinolones	DNA gyrase subunit A (EC 5.99.1.3)	0.313353	0.302935	0.454415	0.252465	0.32278	0.310251
1355	SEED	Virulence	Resistance to antibiotics and toxic compounds	Resistance_to_fluoroquinolones	DNA gyrase subunit B (EC 5.99.1.3)	0.313353	0.284001	0.356629	0.300553	0.2335	0.297841
1356	SEED	Virulence	Resistance to antibiotics and toxic compounds	Cobalt-zinc-cadmium_resistance	Transcriptional regulator, MerR family	0.407359	0.397602	0.264596	0.294542	0.178559	0.142715
1357	SEED	Virulence	Resistance to antibiotics and toxic compounds	Multidrug_Resistance_Efflux_Pumps	Acriflavin resistance protein	0.273065	0.227201	0.184067	0.324597	0.267839	0.384711
1358	SEED	Virulence	Invasion and intracellular resistance	pVir_Plasmid_of_Campylobacter	DNA topoisomerase I (EC 5.99.1.2)	0.290971	0.119912	0.172563	0.252465	0.240368	0.304046
1359	SEED	Virulence	Resistance to antibiotics and toxic compounds	Cobalt-zinc-cadmium_resistance	Cobalt-zinc-cadmium resistance protein CzcA	0.170106	0.113601	0.149554	0.234431	0.32278	0.273021
1360	SEED	Virulence	Resistance to antibiotics and toxic compounds	Multidrug_Resistance_Efflux_Pumps	RND efflux system, inner membrane transporter CmeB	0.120865	0.151467	0.16681	0.264487	0.185427	0.17374
1361	SEED	Virulence	Resistance to antibiotics and toxic compounds	Beta-lactamase	Beta-lactamase 3 2 2 2 21	0.125341	0.201956	0.143802	0.120221	0.157956	0.130305
1362	SEED	Virulence	Adhesion	Streptococcus_pyogenes_recombinatorial_zone	Signal peptidase I	0.138771	0.151467	0.120794	0.11421	0.178559	0.17374
1363	SEED	Virulence	Invasion and intracellular resistance	Listeria_surface_proteins:_LPXTG_motif	Putative peptidoglycan bound protein (LPXTG motif) Lmo1115 homolog	0.0716236	0.100978	0.281852	0.138254	0.041206	0.241996
1364	SEED	Virulence	Resistance to antibiotics and toxic compounds	Cobalt-zinc-cadmium_resistance	Cadmium-transporting ATPase (EC 3.6.3.3)	0.111912	0.119912	0.189819	0.162299	0.11675	0.105485
1365	SEED	Virulence	Pathogenicity islands	Staphylococcal_pathogenicity_islands_SaPI	Heat shock protein 60 family chaperone GroEL	0.210394	0.100978	0.0920334	0.138254	0.130486	0.130305
1366	SEED	Virulence	Regulation of virulence	Streptococcal_Mga_Regulon	Two-component system histidine kinase	0.143247	0.16409	0.0805292	0.132243	0.103015	0.117895
1367	SEED	Virulence	Resistance to antibiotics and toxic compounds	Resistance_to_fluoroquinolones	Topoisomerase IV subunit A (EC 5.99.1.-)	0.0671471	0.100978	0.0862813	0.102188	0.137353	0.142715
1368	SEED	Virulence	Resistance to antibiotics and toxic compounds	Resistance_to_fluoroquinolones	Topoisomerase IV subunit B (EC 5.99.1.-)	0.0671471	0.0820448	0.115042	0.108199	0.0961472	0.14892
1369	SEED	Virulence	Detection	MLST	Triosephosphate isomerase (EC 5.3.1.1)	0.0716236	0.107289	0.0575209	0.0721327	0.103015	0.17374
1370	SEED	Virulence	Resistance to antibiotics and toxic compounds	Copper_homeostasis	Copper-translocating P-type ATPase (EC 3.6.3.4)	0.143247	0.0883559	0.103538	0.0781438	0.0961472	0.0620501
1371	SEED	Virulence	Resistance to antibiotics and toxic compounds	Methicillin_resistance_in_Staphylococci	Undecaprenyl-phosphate N-acetylglucosaminyl 1-phosphate transferase (EC 2.7.8.-)	0.0402883	0.0568003	0.132298	0.096177	0.0686766	0.142715
1372	SEED	Virulence	Resistance to antibiotics and toxic compounds	Cobalt-zinc-cadmium_resistance	Probable Co/Zn/Cd efflux system membrane fusion protein	0.120865	0.0378668	0.0862813	0.0721327	0.0618089	0.117895
1373	SEED	Virulence	Iron Scavenging Mechanisms	Heme,_hemin_uptake_and_utilization_systems_in_GramPositives	NPQTN specific sortase B	0.0581942	0.0820448	0.132298	0.0781438	0.041206	0.0992802
1374	SEED	Virulence	Resistance to antibiotics and toxic compounds	Cobalt-zinc-cadmium_resistance	Cobalt-zinc-cadmium resistance protein	0.0626707	0.0883559	0.0920334	0.102188	0.0549413	0.0744602
1375	SEED	Virulence	Invasion and intracellular resistance	pVir_Plasmid_of_Campylobacter	Type IV secretion system protein VirD4	0.0716236	0.0504891	0.0862813	0.096177	0.0892796	0.0558451
1376	SEED	Virulence	Resistance to antibiotics and toxic compounds	Integrons	Integron integrase	0.0626707	0.0946671	0.0747771	0.0420774	0.137353	0.0372301
1377	SEED	Virulence	Ton_and_Tol_transport_systems	Outer membrane lipoprotein omp16 precursor	Outer membrane lipoprotein omp16 precursor	0.0492412	0.0568003	0.0575209	0.0601106	0.130486	0.0930752
1378	SEED	Virulence	Type III, Type IV, Type VI, ESAT secretion systems	Type_IV_pilus	Type IV fimbrial biogenesis protein PilY1	0.0805766	0.00631114	0.0805292	0.0540995	0.0755443	0.13651
1379	SEED	Virulence	Resistance to antibiotics and toxic compounds	Methicillin_resistance_in_Staphylococci	Beta-lactamase repressor BlaI	0.120865	0.0820448	0.0230083	0.0721327	0.0755443	0.018615
1380	SEED	Virulence	Resistance to antibiotics and toxic compounds	Multidrug_Resistance_Efflux_Pumps	Macrolide export ATP-binding/permease protein MacB (EC 3.6.3.-)	0.0358118	0.138845	0.0575209	0.0540995	0.041206	0.0558451
1381	SEED	Virulence	Ton_and_Tol_transport_systems	MotA/TolQ/ExbB proton channel family protein	MotA/TolQ/ExbB proton channel family protein	0.0402883	0.0378668	0.0862813	0.102188	0.0480736	0.0682552
1382	SEED	Virulence	Iron Scavenging Mechanisms	Heme,_hemin_uptake_and_utilization_systems_in_GramPositives	Zn-dependent hydrolase (beta-lactamase superfamily)	0.0581942	0.0504891	0.0460167	0.0300553	0.123618	0.0620501
1383	SEED	Virulence	Detection	MLST	Guanylate kinase (EC 2.7.4.8)	0.0447648	0.0820448	0.069025	0.0721327	0.0480736	0.0496401
1384	SEED	Virulence	Invasion and intracellular resistance	pVir_Plasmid_of_Campylobacter	Single-stranded DNA-binding protein	0.0581942	0.0378668	0.0632729	0.0661217	0.0686766	0.0620501
1385	SEED	Virulence	Iron Scavenging Mechanisms	Heme,_hemin_uptake_and_utilization_systems_in_GramPositives	Sensor histidine kinase colocalized with HrtAB transporter	0.085053	0.0694225	0.0460167	0.0901659	0.0274706	0.0310251
1386	SEED	Virulence	Resistance to antibiotics and toxic compounds	Multidrug_Resistance_Efflux_Pumps	RND efflux system, outer membrane lipoprotein CmeC	0.0313353	0.044178	0.0862813	0.0360664	0.0755443	0.0682552
1387	SEED	Virulence	Adhesion	Streptococcus_pyogenes_recombinatorial_zone	Chaperonin (heat shock protein 33)	0.0402883	0.113601	0.0460167	0.0480885	0	0.0744602
1388	SEED	Virulence	Pathogenicity islands	Staphylococcal_pathogenicity_islands_SaPI	tmRNA-binding protein SmpB	0.0626707	0.044178	0.0402646	0.0781438	0.020603	0.0682552
1389	SEED	Virulence	Pathogenicity islands	Staphylococcal_pathogenicity_islands_SaPI	Integrase, superantigen-encoding pathogenicity islands SaPI	0.0402883	0.119912	0.0345125	0.0540995	0.0274706	0.0372301
1390	SEED	Virulence	Iron Scavenging Mechanisms	Iron_acquisition_in_Vibrio	Ferric iron ABC transporter, permease protein	0.0671471	0.107289	0.00575209	0.0901659	0.0137353	0.018615
1391	SEED	Virulence	Ton_and_Tol_transport_systems	Ferric siderophore transport system, periplasmic binding protein TonB	Ferric siderophore transport system, periplasmic binding protein TonB	0.0537177	0.0820448	0.0287604	0.0661217	0.020603	0.0496401
1392	SEED	Virulence	Ton_and_Tol_transport_systems	tolB protein precursor, periplasmic protein involved in the tonb-independent uptake of group A colicins	tolB protein precursor, periplasmic protein involved in the tonb-independent uptake of group A colicins, 0	0.0179059	0.0378668	0.0402646	0.0540995	0.0755443	0.0620501
1393	SEED	Virulence	Iron Scavenging Mechanisms	Heme,_hemin_uptake_and_utilization_systems_in_GramPositives	Two-component response regulator SA14-24	0.0626707	0.0757337	0.0287604	0.0360664	0.0755443	0.00620501
1394	SEED	Virulence	Adhesion	Widespread_colonization_island	Type II/IV secretion system ATP hydrolase TadA/VirB11/CpaF, TadA subfamily	0.0537177	0.0568003	0.0230083	0.0721327	0.0618089	0.01241
1395	SEED	Virulence	Resistance to antibiotics and toxic compounds	Copper_homeostasis:_copper_tolerance	Magnesium and cobalt efflux protein CorC	0.0671471	0.0378668	0.0460167	0.0360664	0.0549413	0.0372301
1396	SEED	Virulence	Resistance to antibiotics and toxic compounds	Resistance_to_Vancomycin	Vancomycin B-type resistance protein VanW	0.0581942	0.0504891	0.0345125	0.0180332	0.0343383	0.0620501
1397	SEED	Virulence	Ton_and_Tol_transport_systems	Biopolymer transport protein ExbD/TolR	Biopolymer transport protein ExbD/TolR	0.0134294	0.0252446	0.0172563	0.0661217	0.020603	0.105485
1398	SEED	Virulence	Pathogenicity islands	Staphylococcal_pathogenicity_islands_SaPI	SSU ribosomal protein S18p	0.0537177	0.0694225	0.0345125	0.0240442	0.041206	0.0248201
1399	SEED	Virulence	Iron Scavenging Mechanisms	Campylobacter_Iron_Metabolism	Nonheme iron-containing ferritin	0.0402883	0.0189334	0.0575209	0.0420774	0.0686766	0.018615
1400	SEED	Virulence	Adhesion	Streptococcus_pyogenes_recombinatorial_zone	Fibronectin-binding protein	0.0805766	0.0504891	0.0402646	0.0480885	0.00686766	0.01241
1401	SEED	Virulence	Iron Scavenging Mechanisms	Heme,_hemin_uptake_and_utilization_systems_in_GramPositives	Two-component sensor kinase SA14-24	0.0179059	0.0946671	0.0287604	0.0540995	0.0274706	0.01241
1402	SEED	Virulence	Invasion and intracellular resistance	Listeria_surface_proteins:_LPXTG_motif	Putative peptidoglycan bound protein (LPXTG motif) Lmo2178 homolog	0.0716236	0.0694225	0.00575209	0.0300553	0.0343383	0.018615
1403	SEED	Virulence	Resistance to antibiotics and toxic compounds	Resistance_to_Vancomycin	Vancomycin response regulator VanR	0.0537177	0.0568003	0.00575209	0.0180332	0.0824119	0.00620501
1404	SEED	Virulence	Ton_and_Tol_transport_systems	4-hydroxybenzoyl-CoA thioesterase family active site	4-hydroxybenzoyl-CoA thioesterase family active site0	0.0313353	0.044178	0.0287604	0.0180332	0.0343383	0.0620501
1405	SEED	Virulence	Adhesion	Adhesion_of_Campylobacter	Fibronectin/fibrinogen-binding protein	0.0402883	0.044178	0.0345125	0.0240442	0.041206	0.0310251
1406	SEED	Virulence	Invasion and intracellular resistance	Listeria_surface_proteins:_LPXTG_motif	Sortase	0.0313353	0.0631114	0.0287604	0.0240442	0.020603	0.0434351
1407	SEED	Virulence	Type III, Type IV, Type VI, ESAT secretion systems	ESAT-6_proteins_secretion_system_in_Firmicutes	FtsK/SpoIIIE family protein, putative secretion system component EssC/YukA	0.0761001	0.0504891	0.0115042	0.0601106	0	0.01241
1408	SEED	Virulence	Type III, Type IV, Type VI, ESAT secretion systems	Type_IV_pilus	Twitching motility protein PilT	0.0537177	0.0504891	0.0402646	0.0180332	0.0343383	0.01241
1409	SEED	Virulence	Ton_and_Tol_transport_systems	Putative tonB protein	Putative tonB protein	0.00895295	0.0189334	0.0402646	0.0300553	0.0549413	0.0496401
1410	SEED	Virulence	Resistance to antibiotics and toxic compounds	Multidrug_Resistance_Efflux_Pumps	RND efflux system, membrane fusion protein CmeA	0.0134294	0.0189334	0.0345125	0.0540995	0.0480736	0.018615
1411	SEED	Virulence	Resistance to antibiotics and toxic compounds	Copper_homeostasis:_copper_tolerance	Cytoplasmic copper homeostasis protein cutC	0.0313353	0.0378668	0.0115042	0.0300553	0.041206	0.0248201
1412	SEED	Virulence	Invasion and intracellular resistance	Listeria_surface_proteins:_Internalin-like_proteins	Internalin-like protein (LPXTG motif) Lmo0331 homolog	0.0268589	0.0378668	0.0345125	0.0300553	0.0274706	0.01241
1413	SEED	Virulence	Iron Scavenging Mechanisms	Heme,_hemin_uptake_and_utilization_systems_in_GramPositives	Sortase A, LPXTG specific	0.0358118	0.0189334	0.0517688	0.0360664	0	0.0248201
1414	SEED	Virulence	Resistance to antibiotics and toxic compounds	Resistance_to_Vancomycin	Sensor histidine kinase VanS (EC 2.7.3.-)	0.0268589	0.0568003	0.0402646	0.00601106	0.00686766	0.018615
1415	SEED	Virulence	Type III, Type IV, Type VI, ESAT secretion systems	Type_III_secretion_system_orphans	BarA sensory histidine kinase (= VarS = GacS)	0.0492412	0.0378668	0.00575209	0.0120221	0.0343383	0.00620501
1416	SEED	Virulence	Toxins and superantigens	Streptolysin_S_Biosynthesis_and_Transport	Export ABC transporter ATP-binding protein	0.00447648	0.0189334	0.0460167	0.0601106	0.00686766	0.00620501
1417	SEED	Virulence	Resistance to antibiotics and toxic compounds	Cobalt-zinc-cadmium_resistance	Cobalt-zinc-cadmium resistance protein CzcD	0.0134294	0.0315557	0.0287604	0.0540995	0.00686766	0.00620501
1418	SEED	Virulence	Resistance to antibiotics and toxic compounds	Multidrug_Resistance_Efflux_Pumps	Macrolide-specific efflux protein MacA	0.0402883	0.0126223	0.0172563	0.0300553	0.0274706	0.01241
1419	SEED	Virulence	Iron Scavenging Mechanisms	Hemin_transport_system	Outer membrane receptor proteins, mostly Fe transport	0.00895295	0.0378668	0.0345125	0.0120221	0.020603	0.0248201
1420	SEED	Virulence	Type III, Type IV, Type VI, ESAT secretion systems	Type_IV_pilus	Type IV fimbrial assembly protein PilC	0.0447648	0.0252446	0.0230083	0.0300553	0.0137353	0
1421	SEED	Virulence	Ton_and_Tol_transport_systems	TPR domain protein, putative component of TonB system	TPR domain protein, putative component of TonB system	0.0313353	0.0189334	0.0115042	0.0240442	0.020603	0.0248201
1422	SEED	Virulence	Iron Scavenging Mechanisms	Campylobacter_Iron_Metabolism	Magnesium and cobalt transport protein CorA	0.0268589	0.0315557	0.0172563	0.0300553	0	0.0248201
1423	SEED	Virulence	Iron Scavenging Mechanisms	Iron_acquisition_in_Vibrio	Ferric iron ABC transporter, ATP-binding protein	0.0179059	0.0315557	0.0172563	0.0300553	0.0274706	0.00620501
1424	SEED	Virulence	Invasion and intracellular resistance	Cytolysin_and_Lipase_operon_in_Vibrio	Lipase precursor (EC 3.1.1.3)	0.0223824	0.0378668	0.0230083	0.0180332	0.020603	0
1425	SEED	Virulence	Resistance to antibiotics and toxic compounds	Arsenic_resistance	Arsenical resistance operon repressor	0.0268589	0.0378668	0.00575209	0.0300553	0.00686766	0.01241
1426	SEED	Virulence	Resistance to antibiotics and toxic compounds	Multidrug_Resistance_Efflux_Pumps	Membrane fusion protein of RND family multidrug efflux pump	0.00895295	0.0189334	0.0115042	0.0120221	0.020603	0.0372301
1427	SEED	Virulence	Adhesion	Adhesion_of_Campylobacter	Major cell-binding factor precursor PebA	0	0.107289	0	0	0	0
1428	SEED	Virulence	Resistance to antibiotics and toxic compounds	Arsenic_resistance	Arsenate reductase (EC 1.20.4.1)	0.00447648	0.0252446	0.00575209	0.0360664	0	0.0310251
1429	SEED	Virulence	Adhesion	Adhesins_in_Staphylococcus	Bifunctional autolysin Atl	0.0134294	0.0378668	0.00575209	0.0180332	0.0274706	0
1430	SEED	Virulence	Resistance to antibiotics and toxic compounds	Resistance_to_Vancomycin	Vancomycin Teicoplanin A-type resistance protein VanA	0.0134294	0.0252446	0.0230083	0.0180332	0.020603	0
1431	SEED	Virulence	Resistance to antibiotics and toxic compounds	Arsenic_resistance	Arsenical-resistance protein ACR3	0.00447648	0.0126223	0.0172563	0	0.0549413	0.00620501
1432	SEED	Virulence	Invasion and intracellular resistance	Listeria_surface_proteins:_LPXTG_motif	Putative peptidoglycan bound protein (LPXTG motif) Lmo2576 homolog	0.0447648	0.0126223	0.0172563	0.00601106	0.00686766	0.00620501
1433	SEED	Virulence	Iron Scavenging Mechanisms	Iron_acquisition_in_Vibrio	Ferrous iron transport protein A	0.0179059	0.0568003	0	0.0120221	0.00686766	0
1434	SEED	Virulence	Type III, Type IV, Type VI, ESAT secretion systems	Type_IV_pilus	Type IV fimbrial assembly, ATPase PilB	0.0179059	0.0252446	0.0115042	0.0360664	0	0
1435	SEED	Virulence	Resistance to antibiotics and toxic compounds	Cobalt-zinc-cadmium_resistance	DNA-binding heavy metal response regulator	0.0268589	0	0.00575209	0.0180332	0.0137353	0.0248201
1436	SEED	Virulence	Type III, Type IV, Type VI, ESAT secretion systems	Type_4_secretion_and_conjugative_transfer	Ynd	0	0.0252446	0.0172563	0	0.020603	0.018615
1437	SEED	Virulence	Ton_and_Tol_transport_systems	TolA protein	TolA protein	0.0179059	0.0315557	0.0115042	0.0120221	0.00686766	0
1438	SEED	Virulence	Iron Scavenging Mechanisms	Heme,_hemin_uptake_and_utilization_systems_in_GramPositives	Iron-dependent repressor IdeR/DtxR	0.0179059	0.0189334	0.0115042	0	0.020603	0.00620501
1439	SEED	Virulence	Resistance to antibiotics and toxic compounds	Multidrug_Resistance_Efflux_Pumps	RND efflux system, outer membrane lipoprotein, NodT family	0.0134294	0.00631114	0.0172563	0.0180332	0.00686766	0.01241
1440	SEED	Virulence	Resistance to antibiotics and toxic compounds	Aminoglycoside_adenylyltransferases	Aminoglycoside N6'-acetyltransferase (EC 2.3.1.82)	0.00895295	0.0189334	0.0115042	0.00601106	0.00686766	0.018615
1441	SEED	Virulence	Iron Scavenging Mechanisms	Campylobacter_Iron_Metabolism	Peroxide stress regulator	0.00895295	0.0126223	0	0	0.0274706	0.018615
1442	SEED	Virulence	Streptococcus_pyogenes_Virulome	Collagen-like surface protein	Collagen-like surface protein	0.00895295	0	0.0460167	0	0	0.01241
1443	SEED	Virulence	Invasion and intracellular resistance	Listeria_surface_proteins:_LPXTG_motif	Putative peptidoglycan bound protein (LPXTG motif) Lin2281 homolog	0.0179059	0.0126223	0	0.0300553	0	0.00620501
1444	SEED	Virulence	Iron Scavenging Mechanisms	Heme,_hemin_uptake_and_utilization_systems_in_GramPositives	Metallo-beta-lactamase superfamily domain protein in prophage	0.00447648	0.0126223	0	0.0240442	0.00686766	0.018615
1445	SEED	Virulence	Iron Scavenging Mechanisms	Campylobacter_Iron_Metabolism	Hemerythrin-like iron-binding protein	0.00895295	0.0252446	0	0.0120221	0.00686766	0.01241
1446	SEED	Virulence	Iron Scavenging Mechanisms	Iron_acquisition_in_Vibrio	Ferric iron ABC transporter, iron-binding protein	0.00895295	0.0252446	0	0.0180332	0.00686766	0.00620501
1447	SEED	Virulence	Invasion and intracellular resistance	Listeria_surface_proteins:_Internalin-like_proteins	Internalin-like protein (LPXTG motif) Lmo0409 homolog	0.00895295	0.0378668	0	0.0180332	0	0
1448	SEED	Virulence	Resistance to antibiotics and toxic compounds	Cobalt-zinc-cadmium_resistance	Heavy metal sensor histidine kinase	0.0179059	0.0126223	0.00575209	0.0120221	0.0137353	0
1449	SEED	Virulence	Resistance to antibiotics and toxic compounds	Multidrug_Resistance,_2-protein_version_Found_in_Gram-positive_bacteria	Membrane component of multidrug resistance system	0	0.0252446	0.0115042	0.0120221	0.00686766	0.00620501
Total						94.0015	93.8656	95.5479	94.6682	95.8107	96.1157

## Sheet: Table 3
		Abundance
CAZY	All	Cecal AC	WBC	RSC	FC	FWB	RSF
CAZY	AA10|CBM5	0.657895					0.0518403
CAZY	AA3		0.254777	0.119474	0.0584454	0.145455	0.155521
CAZY	AA4				0.0584454
CAZY	AA5				0.0584454	0.0727273	0.0518403
CAZY	AA6	0.219298	0.382166	0.358423		0.0727273	0.103681
CAZY	CBM12	0.109649		0.238949		0.0727273	0.259202
CAZY	CBM12|GH18					0.0727273	0.0518403
CAZY	CBM13	0.109649		0.238949	0.233781	0.436364	0.414723
CAZY	CBM13|GH27					0.0727273
CAZY	CBM16|GH18				0.0584454
CAZY	CBM16|GT39						0.0518403
CAZY	CBM2	0.219298	0.89172	0.36	0.233781		0.0518403
CAZY	CBM2 GH10	0.109649
CAZY	CBM2|CBM13|GH10				0.0584454
CAZY	CBM2|GH74						0.0518403
CAZY	CBM2|GH9				0.0584454
CAZY	CBM20	0.109649	0.254777	0.238949	0.0584454	0.145455	0.207361
CAZY	CBM21			0.119474
CAZY	CBM22		0.127389
CAZY	CBM22|GH10				0.233781
CAZY	CBM22|GH30						0.0518403
CAZY	CBM23					0.363636
CAZY	CBM25		0.127389	0.83632		0.0727273	0.207361
CAZY	CBM25 CBM26	0.109649	0.127389	0.477897		0.0727273	0.155521
CAZY	CBM25 GH13 CBM26	0.109649			0.0584454
CAZY	CBM25|CBM20|GH119			0.119474		0.145455	0.155521
CAZY	CBM25|GH13			0.358423		0.0727273	0.570244
CAZY	CBM25|GH13|CBM26			0.358423		0.218182	0.259202
CAZY	CBM26	0.109649	0.254777	0.477897		0.145455	0.984966
CAZY	CBM27	0.109649	0.127389	0.119474	0.0584454	0.0727273	0.0518403
CAZY	CBM27|CBM23|GH26		0.127389
CAZY	CBM3 CBM2 GH9	0.109649			0.0584454
CAZY	CBM3 GH6 CBM2 GH12	0.109649
CAZY	CBM3 GH9	0.328947
CAZY	CBM3 GH9 CBM4	0.109649
CAZY	CBM3|CBM64|GH9				0.116891
CAZY	CBM3|GH128			0.358423		0.0727273	0.103681
CAZY	CBM3|GH26|CBM35					0.0727273
CAZY	CBM3|GH26|CBM35|GH44						0.0518403
CAZY	CBM3|GH74			0.119474
CAZY	CBM3|GH9				0.409117	0.0727273
CAZY	CBM32	1.31579	1.40127	0.238949	0.818235	0.581818	0.259202
CAZY	CBM32 GH20	0.767544	0.509554	0.358423	0.350672	0.436364	0.155521
CAZY	CBM32 GH31	0.438596	0.636943		0.467563	0.436364	0.414723
CAZY	CBM32 GH35	0.548246		0.358423	0.116891	0.0727273	0.570244
CAZY	CBM32|GH38			0.119474		0.290909	0.311042
CAZY	CBM32|GH55		0.127389			0.436364
CAZY	CBM32|GH85				0.0584454
CAZY	CBM34	0.548246		0.238949	0.175336
CAZY	CBM35	0.328947		0.358423	0.233781		0.155521
CAZY	CBM35|GH66					0.0727273	0.0518403
CAZY	CBM37	0.986842	1.91083	1.79211	1.05202	0.654545	2.17729
CAZY	CBM37 PL1	0.109649			0.0584454
CAZY	CBM37|CBM13						0.0518403
CAZY	CBM37|GH74				0.0584454
CAZY	CBM37|PL11|CBM13		0.127389
CAZY	CBM38|GH32						0.103681
CAZY	CBM4		0.127389	0.119474			0.103681
CAZY	CBM47	0.877193
CAZY	CBM47|GT17				0.467563
CAZY	CBM48	0.438596	0.89172	1.91159	0.642899	0.8	1.96993
CAZY	CBM48 GH13 CBM41	0.109649	0.127389
CAZY	CBM48 GH77 GH13	0.109649
CAZY	CBM48|CBM25|GH13|CBM41				0.0584454
CAZY	CBM48|CBM26			0.955795	0.0584454		0.570244
CAZY	CBM48|CBM41						0.0518403
CAZY	CBM48|CE1					0.145455
CAZY	CBM48|GH13	1.31579	2.67516	1.55317	1.16891	2.83636	1.76257
CAZY	CBM48|GH13|CBM41			0.477897	0.0584454	0.0727273
CAZY	CBM5			0.238949	0.0584454		0.0518403
CAZY	CBM5|GH18						0.155521
CAZY	CBM50	3.94737	2.54777	3.22581	2.5716	2.98182	2.74754
CAZY	CBM50 GH25	0.109649	0.127389	0	0.116891	0.0727273	0
CAZY	CBM50|CE8				0.0584454
CAZY	CBM50 GH18	0.328947	0	0.238949	0.0584454	0	0.0518403
CAZY	CBM50 GH73		0.254777	0.238949	0.292227	0.218182
CAZY	CBM51	0.109649	0.127389		0.116891	0.0727273	0.103681
CAZY	CBM51 CBM32	0.109649		0.119474
CAZY	CBM51|GH27		0.127389			0.0727273
CAZY	CBM51|GH95		0.127389
CAZY	CBM54	0.219298	0.254777		0.0584454		0.207361
CAZY	CBM56						0.103681
CAZY	CBM6				0.116891		0.103681
CAZY	CBM6 GH43	0.219298			0.116891	0.145455	0.103681
CAZY	CBM6 GH86	0.109649					0.0518403
CAZY	CBM6|CBM32|GH92			0.119474
CAZY	CBM6|CBM35|GH30				0.0584454
CAZY	CBM6|CBM35|GH30|GH3				0.0584454
CAZY	CBM6|GH16		0.127389	0.119474			0.0518403
CAZY	CBM6|GH16|CBM4|CBM54					0.0727273
CAZY	CBM6|GH27					0.0727273
CAZY	CBM6|GH3		0.127389			0.0727273
CAZY	CBM6|GH30|GH3				0.0584454
CAZY	CBM6|GH43|CBM22				0.0584454
CAZY	CBM6|GH43|CBM22|GH10				0.0584454
CAZY	CBM6|GH43|CBM36|CBM2|CBM13|GH10				0.0584454
CAZY	CBM6|GH43|CBM66		0.127389
CAZY	CBM6|GH43|CE1				0.175336	0.145455	0.0518403
CAZY	CBM6|GH5|GH43|CBM13			0.119474
CAZY	CBM6|GH92			0.238949			0.0518403
CAZY	CBM62						0.0518403
CAZY	CBM66|GH28				0.0584454
CAZY	CBM66|GH32				0.0584454
CAZY	CBM9					0.218182	0.207361
CAZY	CBM9 GH10	0.109649			0.0584454	0.0727273
CAZY	CBM9|CBM22|GH10				0.0584454
CAZY	CBM9|GH87			0.119474
CAZY	CE1	0.328947	0.89172		0.701344	0.509091	1.29601
CAZY	CE1 GH31	0.109649		0.83632			0.0518403
CAZY	CE1|CBM20			0.119474	0.116891
CAZY	CE1|CBM22|GH10				0.116891
CAZY	CE1|CBM22|GH30				0.0584454
CAZY	CE1|CBM9				0.0584454
CAZY	CE1|CBM9|CBM22|GH10						0.103681
CAZY	CE10	1.75439	0.509554		0.87668	0.509091	0.777605
CAZY	CE10|GH10			0.477897	0.116891
CAZY	CE11		1.01911		0.526008	0.8	1.14049
CAZY	CE12			1.67264	0.0584454	0.145455
CAZY	CE12|CBM35|CBM13				0.116891
CAZY	CE12|CE8				0.0584454
CAZY	CE14				0.0584454	0.0727273
CAZY	CE2	0.109649	0.254777		0.526008	0.0727273
CAZY	CE4	0.986842	0.764331		0.467563	0.509091	0.777605
CAZY	CE4|GH9			0.358423			0.0518403
CAZY	CE5					0.0727273
CAZY	CE6|CBM48|CE1					0.0727273
CAZY	CE7			0.238949			0.103681
CAZY	CE8	0.109649	0.636943	0.119474	0.116891
CAZY	CE9	0.219298	0.382166	1.07527	0.409117	0.581818	0.259202
CAZY	GH1	1.20614	0.764331	0.477897	2.51315	0.581818	0.155521
CAZY	GH10			0.119474		0.145455	0.0518403
CAZY	GH101					0.0727273
CAZY	GH105	0.767544	0.127389	0.597372	0.818235	0.509091	0.777605
CAZY	GH105 GH28	0.328947	0.127389			0.0727273
CAZY	GH106	0.219298	0.254777		0.584454
CAZY	GH106|CE12					0.0727273
CAZY	GH108				0.0584454	0.218182
CAZY	GH109	0.109649	0.254777	0.119474	0.526008	0.145455	0.259202
CAZY	GH110		0.509554		0.233781	0.363636	0.155521
CAZY	GH110|CBM51		0.127389	0.358423		0.218182
CAZY	GH111				0.0584454
CAZY	GH112	0.219298	0.764331	0.238949	0.292227	0.363636	0.0518403
CAZY	GH113			0.119474	0.0584454
CAZY	GH115	0.219298	0.382166	0.119474	0.584454	1.23636	0.207361
CAZY	GH116			0.238949		0.145455	0.0518403
CAZY	GH117		0.254777	0.119474	0.0584454	0.145455	0.207361
CAZY	GH12			0.119474	0.116891	0.0727273	0.207361
CAZY	GH120		0.382166	0.119474	0.233781	0.0727273
CAZY	GH121						0.0518403
CAZY	GH123		0.127389		0.116891	0.0727273	0.0518403
CAZY	GH124	0.109649			0.0584454
CAZY	GH125		1.01911	0.119474	0.292227		0.207361
CAZY	GH127	1.53509		0.358423	0.642899	0.8	0.207361
CAZY	GH128				0.0584454
CAZY	GH13	4.38596	3.94904	5.37634	2.04559	3.41818	5.39139
CAZY	GH13 CBM20	0.109649				0.0727273	0.103681
CAZY	GH13 CBM26	1.09649	0.382166	3.10633	0.292227	1.30909	3.7325
CAZY	GH13 CBM34	0.986842	0.509554	0.119474	0.526008	0.218182
CAZY	GH130	0.328947	1.01911	0.238949	0.175336	0.218182	0.155521
CAZY	GH16	0.548246	0.127389	0.477897	0.116891	0.509091	0.155521
CAZY	GH16 CBM4	0.219298	0.382166			0.0727273
CAZY	GH16|CBM32|GH55|CBM54					0.0727273
CAZY	GH16|CBM4|CBM54					0.290909
CAZY	GH16|GH43					0.0727273
CAZY	GH16|GH9|CBM4				0.116891
CAZY	GH17				0.0584454
CAZY	GH18	0.877193	0.382166	0.477897	0.584454	0.581818	0.829445
CAZY	GH2	5.15351	4.58599	3.58423	5.78609	4.72727	3.16226
CAZY	GH2 CBM57	0.109649	0.127389	0.238949	0.292227	0.0727273	0.207361
CAZY	GH2|CBM32		0.127389	0.119474	0.935126	1.38182	0.777605
CAZY	GH2|CBM51			0.119474		0.0727273	0.0518403
CAZY	GH20	0.657895	0.636943	0.238949	1.22735	1.09091	0.466563
CAZY	GH23	3.94737	2.92994	3.58423	4.96786	4.50909	2.6957
CAZY	GH23 CBM50	0.328947		0.238949	0.116891	0.218182	0.362882
CAZY	GH24	0.219298	0.254777	0.358423	0.409117	0.727273	0.622084
CAZY	GH25	1.09649	1.01911	0.358423	0.350672	0.509091	0.777605
CAZY	GH26			0.238949	0.233781	0.0727273	0.207361
CAZY	GH27	0.328947	0.509554		0.116891	0.363636	0.103681
CAZY	GH28	0.986842	0.509554	0.119474	0.409117	0.727273	0.207361
CAZY	GH29	0.657895	1.01911	0.597372	0.642899	0.509091	0.725765
CAZY	GH29 CBM32	0.219298	0.254777		0.350672	0.145455	0.155521
CAZY	GH29|CBM13		0.127389
CAZY	GH3	6.0307	4.4586	3.94265	7.83168	6.03636	5.85796
CAZY	GH30		0.382166	0.238949	0.292227	0.581818	0.155521
CAZY	GH30|CBM13		0.127389
CAZY	GH31	2.30263	1.91083	2.86738	1.2858	1.67273	1.19233
CAZY	GH32	1.20614	1.40127		1.2858	0.8	0.829445
CAZY	GH33	0.109649	0.764331	0.238949	0.175336	0.509091	0.259202
CAZY	GH33 GH123	0.328947
CAZY	GH35		0.382166	0.238949	0.584454	0.581818	0.259202
CAZY	GH36	0.438596	1.78344	1.19474	1.05202	1.89091	1.03681
CAZY	GH36|CBM32		0.127389	0.119474		0.0727273
CAZY	GH36|GH38				0.116891
CAZY	GH38	0.438596	0.382166		0.584454	0.654545	0.207361
CAZY	GH39	0.548246	0.764331	0.597372	0.75979	0.509091	0.570244
CAZY	GH4	0.328947	0.127389	0.477897	0.116891	0.290909	0.259202
CAZY	GH42	0.328947	0.382166	0.119474	0.116891		0.103681
CAZY	GH43	3.50877	2.54777	2.74791	1.81181	3.49091	1.96993
CAZY	GH43 CBM13	0.109649			0.233781		0.466563
CAZY	GH43 CE1 CBM22	0.109649
CAZY	GH43|CBM32		0.127389	0.238949	0.0584454	0.218182
CAZY	GH43|CBM35|CBM13		0.127389
CAZY	GH43|CBM42|GH30				0.0584454
CAZY	GH43|CBM62|GH30		0.127389
CAZY	GH43|GH51					0.218182
CAZY	GH44				0.116891
CAZY	GH5	0.438596	0.509554	0.358423	0.292227	0.218182	0.518403
CAZY	GH5 CBM2	0.219298			0.116891
CAZY	GH5 CBM37	0.109649			0.116891
CAZY	GH5 CBM4	0.219298
CAZY	GH5 GH26	0.109649
CAZY	GH5|CBM10						0.0518403
CAZY	GH5|CBM13		0.127389				0.103681
CAZY	GH5|CBM65		0.127389				0.103681
CAZY	GH5|GH26		0.254777		0.116891		0.103681
CAZY	GH50				0.0584454
CAZY	GH51	0.877193	0.89172	0.955795	0.526008	0.509091	0.881286
CAZY	GH53	0.657895	0.89172	0.358423	0.642899		0.155521
CAZY	GH53 CBM61	0.109649			0.0584454
CAZY	GH55			0.238949	0.0584454		0.103681
CAZY	GH57		0.127389	0.119474	0.175336	1.45455	0.518403
CAZY	GH59						0.103681
CAZY	GH6 CBM2	0.109649
CAZY	GH63	0.109649		0.238949	0.175336	0.218182	0.0518403
CAZY	GH65	0.438596	0.127389	0.597372	0.292227	0.218182	0.155521
CAZY	GH66		0.254777	0.119474		0.145455	0.155521
CAZY	GH67		0.127389	0.238949	0.116891	0.145455
CAZY	GH72	0.328947	0.636943	0.597372	0.642899	0.363636	0.466563
CAZY	GH73	0.548246	1.1465	0.716846	1.98714	1.74545	1.03681
CAZY	GH74					0.218182
CAZY	GH76	0.109649		0.238949	0.409117	0.0727273	0.259202
CAZY	GH77	0.986842	1.27389	1.19474	0.584454	0.218182	0.518403
CAZY	GH77 CBM20	0.109649	0.636943	0.716846	0.467563	0.581818	0.725765
CAZY	GH77|GH13|CBM34			0.119474	0.0584454	0.0727273
CAZY	GH77|GT35			0.119474			0.673924
CAZY	GH78	0.657895	0.127389	0.83632	0.87668	0.436364
CAZY	GH78|CBM67				0.0584454	0.0727273
CAZY	GH78|GH33				0.233781	0.0727273
CAZY	GH79		0.254777
CAZY	GH8	0.109649	0.509554	0.119474	0.116891	0.145455	0.103681
CAZY	GH84		0.127389		0.0584454		0.103681
CAZY	GH84|CBM32			0.119474	0.116891	0.218182	0.259202
CAZY	GH85				0.0584454
CAZY	GH87	0.109649			0.0584454
CAZY	GH87|CBM35					0.0727273
CAZY	GH88	0.328947	0.382166	0.238949	0.87668	0.0727273	0.207361
CAZY	GH89				0.350672	0.581818
CAZY	GH89|CBM32		0.127389	0.238949	0.233781		0.0518403
CAZY	GH9	0.109649	0.89172	0.716846	0.292227	0.145455	0.259202
CAZY	GH9 CBM4	0.219298			0.175336
CAZY	GH91				0.0584454		0.0518403
CAZY	GH92	1.75439	0.382166	0.955795	1.40269	1.30909	1.65889
CAZY	GH93					0.145455
CAZY	GH94	0.986842	1.1465	1.07527	1.75336	0.945455	0.725765
CAZY	GH94 GT84	0.219298	0.127389		0.233781	0.0727273
CAZY	GH95	0.438596	0.127389	0.477897	1.63647	0.654545	0.984966
CAZY	GH97	0.438596	0.636943	1.67264	0.75979	2.03636	1.55521
CAZY	GH99	0.219298	0.127389	0.238949	0.116891	0.145455	0.207361
CAZY	GT1	0.438596	0.127389	0.119474	0.233781	0.0727273	0.155521
CAZY	GT10		0.127389		0.233781
CAZY	GT11		0.382166		0.116891	0.0727273	0.103681
CAZY	GT14			0.119474	0.116891		0.0518403
CAZY	GT17	0.109649
CAZY	GT19	0.219298		0.238949	0.116891	0.363636	0.725765
CAZY	GT2	8.99123	10.1911	10.0358	7.36411	8.8	11.2494
CAZY	GT2|GT4		0.127389	0.119474	0.175336	0.363636	0.0518403
CAZY	GT2|GT8				0.0584454
CAZY	GT20			0.119474	0.116891		0.103681
CAZY	GT23	0.109649	0.127389	0.119474	0.0584454
CAZY	GT26	0.438596	0.509554	0.119474	0.584454	0.509091	0.311042
CAZY	GT28	0.986842	1.01911	1.91159	0.993571	0.509091	1.65889
CAZY	GT29		0.127389
CAZY	GT29 GT8	0.109649
CAZY	GT3	0.219298		0.238949	0.175336	0.654545	0.362882
CAZY	GT30		0.382166	0.597372	0.175336	0.290909	0.362882
CAZY	GT32	0.109649	0.127389	0.238949	0.116891	0.581818	0.414723
CAZY	GT34	0.109649
CAZY	GT35	3.17982	2.80255	2.38949	1.9287	1.74545	2.64386
CAZY	GT35|GT3						0.0518403
CAZY	GT39		0.127389		0.0584454
CAZY	GT4	5.04386	5.47771	4.6595	6.25365	4.50909	5.18403
CAZY	GT41	0.382166			0.233781	0.290909	0.311042
CAZY	GT42	0.127389
CAZY	GT44		0.119474	0.409117
CAZY	GT47	0.438596	0.127389	1.07527		0.290909	0.414723
CAZY	GT5	1.20614	0.382166	0.83632	0.467563	1.6	0.622084
CAZY	GT51	1.53509	3.3121	2.62843	1.57802	2.25455	1.65889
CAZY	GT56						0.0518403
CAZY	GT66		0.254777	0.119474	0.175336	0.0727273	0.259202
CAZY	GT8	1.42544	0.509554	0.597372	0.75979	0.509091	0.414723
CAZY	GT80						0.0518403
CAZY	GT81			0.119474		0.0727273	0.0518403
CAZY	GT82			0.119474			0.362882
CAZY	GT83	0.109649	0.382166	0.119474	0.0584454	0.290909	0.518403
CAZY	GT9	0.219298	0.382166	0.597372	0.0584454	0.290909	0.414723
CAZY	GT90	0.109649
CAZY	PL1	0.548246	0.509554		0.175336		0.103681
CAZY	PL1 CBM13	0.109649
CAZY	PL1 CBM35	0.219298
CAZY	PL1 CE8	0.109649	0.127389		0.0584454	0.0727273
CAZY	PL1|CBM35|PL9			0.119474
CAZY	PL1|CE8						0.0518403
CAZY	PL10	0.109649			0.0584454		0.0518403
CAZY	PL10 CE8	0.219298					0.0518403
CAZY	PL11	0.109649	0.127389		0.409117	0.290909	0.0518403
CAZY	PL11|CBM13				0.0584454	0.145455
CAZY	PL12				0.0584454	0.0727273
CAZY	PL13					0.0727273
CAZY	PL15	0.219298	0.127389		0.175336	0.0727273	0.0518403
CAZY	PL8				0.116891	0.145455	0.103681
